# Supplementary material for: Cancer prognosis prediction using somatic point mutation and copy number variation data: a comparison of gene-level and pathway-based models
Source: Springer Nature journal article supplement (doi:10.1186/s12859-020-03791-0), 2020-10-20

# Cancer prognosis prediction using somatic point mutation and copy number variation data: a comparison of gene-level and pathway-based models

Xingyu Zheng, Christopher I. Amos, H. Robert Frost

## List of Contents:

### List of Tables ..... 3

|    |                                                                                                              |   |
|----|--------------------------------------------------------------------------------------------------------------|---|
| X1 | The full list of 29 cohorts analyzed in this study and some clinical characteristics. ....                   | 3 |
| X2 | Detailed information about pathway collections used in this study. ....                                      | 4 |
| X3 | The predictors retained by the pathway-level LGG SPM model using binary method and HALLMARK collection. .... | 4 |
| X4 | The predictors retained by the pathway-level LGG SPM model using log OR method and HALLMARK collection. .... | 4 |

### List of Figures ..... 5

|        |                                                                                          |    |
|--------|------------------------------------------------------------------------------------------|----|
| S1     | The results of null models. ....                                                         | 5  |
| S2-S30 | The distribution of concordance index values for all models estimated on all cohorts. .. | 7  |
| S2     | ACC cohort .....                                                                         | 8  |
| S3     | BLCA cohort .....                                                                        | 9  |
| S4     | BRCA cohort .....                                                                        | 10 |
| S5     | CESC cohort .....                                                                        | 11 |
| S6     | COAD cohort .....                                                                        | 12 |
| S7     | ESCA cohort .....                                                                        | 13 |
| S8     | GBM cohort .....                                                                         | 14 |
| S9     | HNSC cohort .....                                                                        | 15 |
| S10    | KICH cohort .....                                                                        | 16 |
| S11    | KIRC cohort .....                                                                        | 17 |
| S12    | KIRP cohort .....                                                                        | 18 |
| S13    | LAML cohort .....                                                                        | 19 |
| S14    | LGG cohort .....                                                                         | 20 |

|                                                    |                              |           |
|----------------------------------------------------|------------------------------|-----------|
| S15                                                | LIHC cohort .....            | 21        |
| S16                                                | LUAD cohort .....            | 22        |
| S17                                                | LUSC cohort .....            | 23        |
| S18                                                | MESO cohort .....            | 24        |
| S19                                                | OV cohort .....              | 25        |
| S20                                                | PAAD cohort .....            | 26        |
| S21                                                | PCPG cohort .....            | 27        |
| S22                                                | PRAD cohort .....            | 28        |
| S23                                                | READ cohort .....            | 29        |
| S24                                                | SARC cohort .....            | 30        |
| S25                                                | STAD cohort .....            | 31        |
| S26                                                | TGCT cohort .....            | 32        |
| S27                                                | THCA cohort .....            | 33        |
| S28                                                | THYM cohort .....            | 34        |
| S29                                                | UCEC cohort .....            | 35        |
| S30                                                | UVM cohort .....             | 36        |
| <b>Results of simulation study for Lasso .....</b> |                              | <b>37</b> |
| S31                                                | Solution path of Lasso ..... | 38        |

Table X1 The full list of 29 cohorts analyzed in this study and some clinical characteristics.

| Cohort | Full name                             | Sample size<br>CNV | Sample size<br>SPM | Death rate<br>CNV | Death rate<br>SPM |
|--------|---------------------------------------|--------------------|--------------------|-------------------|-------------------|
| ACC    | Adrenocortical Carcinoma              | 89                 | 90                 | 0.36              | 0.37              |
| BLCA   | Bladder Carcinoma                     | 404                | 391                | 0.44              | 0.45              |
| BRCA   | Breast Cancer                         | 1064               | 759                | 0.14              | 0.15              |
| CESC   | Cervical Cancer                       | 282                | 196                | 0.24              | 0.21              |
| COAD   | Colon Cancer                          | 428                | 210                | 0.22              | 0.23              |
| ESCA   | Esophageal Cancer                     | 184                | 183                | 0.41              | 0.41              |
| GBM    | Glioblastoma                          | 570                | 277                | 0.81              | 0.75              |
| HNSC   | Head and Neck Cancer                  | 519                | 507                | 0.42              | 0.43              |
| KICH   | Kidney Chromophobe                    | 65                 | 65                 | 0.14              | 0.14              |
| KIRC   | Kidney Clear Cell Carcinoma           | 526                | 213                | 0.33              | 0.25              |
| KIRP   | Kidney Papillary Cell Carcinoma       | 285                | 279                | 0.15              | 0.15              |
| LAML   | Acute Myeloid Leukemia                | 166                | 171                | 0.63              | 0.62              |
| LGG    | Lower Grade Glioma                    | 508                | 511                | 0.25              | 0.24              |
| LIHC   | Liver Cancer                          | 364                | 199                | 0.35              | 0.45              |
| LUAD   | Lung Adenocarcinoma                   | 503                | 477                | 0.36              | 0.36              |
| LUSC   | Lung Squamous Cell Carcinoma          | 494                | 175                | 0.43              | 0.49              |
| MESO   | Mesothelioma                          | 85                 | 81                 | 0.86              | 0.85              |
| OV     | Ovarian Cancer                        | 564                | 141                | 0.59              | 0.65              |
| PAAD   | Pancreatic Cancer                     | 183                | 183                | 0.55              | 0.54              |
| PCPG   | Pheochromocytoma and<br>Paraganglioma | 160                | 177                | 0.04              | 0.03              |
| PRAD   | Prostate Cancer                       | 491                | 497                | 0.02              | 0.02              |
| READ   | Rectal Cancer                         | 157                | 80                 | 0.17              | 0.20              |
| SARC   | Sarcoma                               | 257                | 255                | 0.38              | 0.38              |
| STAD   | Stomach Cancer                        | 413                | 355                | 0.40              | 0.37              |
| TGCT   | Testicular Cancer                     | 134                | 134                | 0.03              | 0.03              |
| THCA   | Thyroid Cancer                        | 498                | 495                | 0.03              | 0.03              |
| THYM   | Thymoma                               | 122                | 122                | 0.07              | 0.07              |
| UCEC   | Endometroid Cancer                    | 537                | 194                | 0.17              | 0.13              |
| UVM    | Ocular Melanoma                       | 80                 | 80                 | 0.29              | 0.29              |

Table X2 Detailed information about pathway collections used in this study.

|          | Pathway size | Subset of | Derivation source                                |
|----------|--------------|-----------|--------------------------------------------------|
| HALLMARK | 50           | HALLMARK  | Condense pathways from all collections in MSigDB |
| PID      | 196          | C2CP      | Pathway Interaction Database                     |
| BIOCARTA | 289          | C2CP      | BioCarta pathway database                        |
| REACTOME | 1499         | C2CP      | Reactome pathway database                        |
| BP       | 1350         | C5        | GO Biological Process Ontology                   |

Table X3 The predictors retained by LASSO for the pathway-level LGG SPM model where predictor values were generated using binary method for the pathways in the MSigDB HALLMARK collection.

|                                          | coef  | pvalue   |
|------------------------------------------|-------|----------|
| HALLMARK_APICAL_JUNCTION                 | 0.84  | 4.13E-05 |
| HALLMARK_PROTEIN_SECRETION               | 0.79  | 1.74E-04 |
| HALLMARK_REACTIVE_OXIGEN_SPECIES_PATHWAY | -1.40 | 3.30E-03 |
| HALLMARK_BILE_ACID_METABOLISM            | -1.35 | 4.54E-03 |
| HALLMARK_MTORC1_SIGNALING                | -0.36 | 0.23     |
| HALLMARK_OXIDATIVE_PHOSPHORYLATION       | -0.07 | 0.87     |

Table X4 The predictors retained by LASSO for the pathway-level LGG SPM model where predictor values were generated using log-odds ratios for the pathways in the MSigDB HALLMARK collection.

|                                    | coef  | pvalue   |
|------------------------------------|-------|----------|
| HALLMARK_PROTEIN_SECRETION         | 0.70  | 2.74E-06 |
| HALLMARK_APICAL_JUNCTION           | 0.35  | 7.22E-03 |
| HALLMARK_BILE_ACID_METABOLISM      | -0.53 | 0.06     |
| HALLMARK_MTORC1_SIGNALING          | -0.31 | 0.12     |
| HALLMARK_OXIDATIVE_PHOSPHORYLATION | -0.16 | 0.54     |
| HALLMARK_XENOBIOTIC_METABOLISM     | -0.07 | 0.74     |

## The results of null models

To ensure the predictive signals are not generated randomly and that the prediction is not inflated in our analyses, we checked the results of null models, in which all the steps are the same except that the survival outcomes are shuffled among individuals to break any association between the variables and the outcomes, while maintain the correlations among variables.

**Figure S1 Heatmap of the concordance index for different null models and cancer types.** “PLv” represents “Pathway-level” and “GLv” represents “Gene-level”. HALLMARK, PID, BIOCARTA, REACTOME and BP are the used five pathway collections as introduced in Methods. Corresponding to each model introduced in Methods: “log OR” and “Binary” represent the two enrichment methods for SPM data; “all genes”, “Path intersected”, “Cosmic intersected”, “Cox filter” represents the filters on the genes. The maximum value among all is 0.59, the minimum is 0.46 and the average is 0.50.

The results of these null models show that for all the models and cohorts, the concordance is around the expected null value of 0.5, which demonstrates that the signals in our true models are valid.



## The results of the distribution of concordance index values for all models estimated on all cohorts.

### **Figure S2-S30 Distribution of concordance index values for all models evaluated on each cohort.**

“PLV” represents “Pathway-level” and “GLV” represents “Gene-level”. HALLMARK, PID, BIOCARTA, REACTOME and BP are the used five pathway collections as introduced in Methods. Corresponding to each model introduced in Methods: “log OR” and “Binary” represent the two enrichment methods for SPM data; “all genes”, “Path intersected”, “Cosmic intersected”, “Cox filter” represents the filters on the genes.

Figure S2 ACC cohort

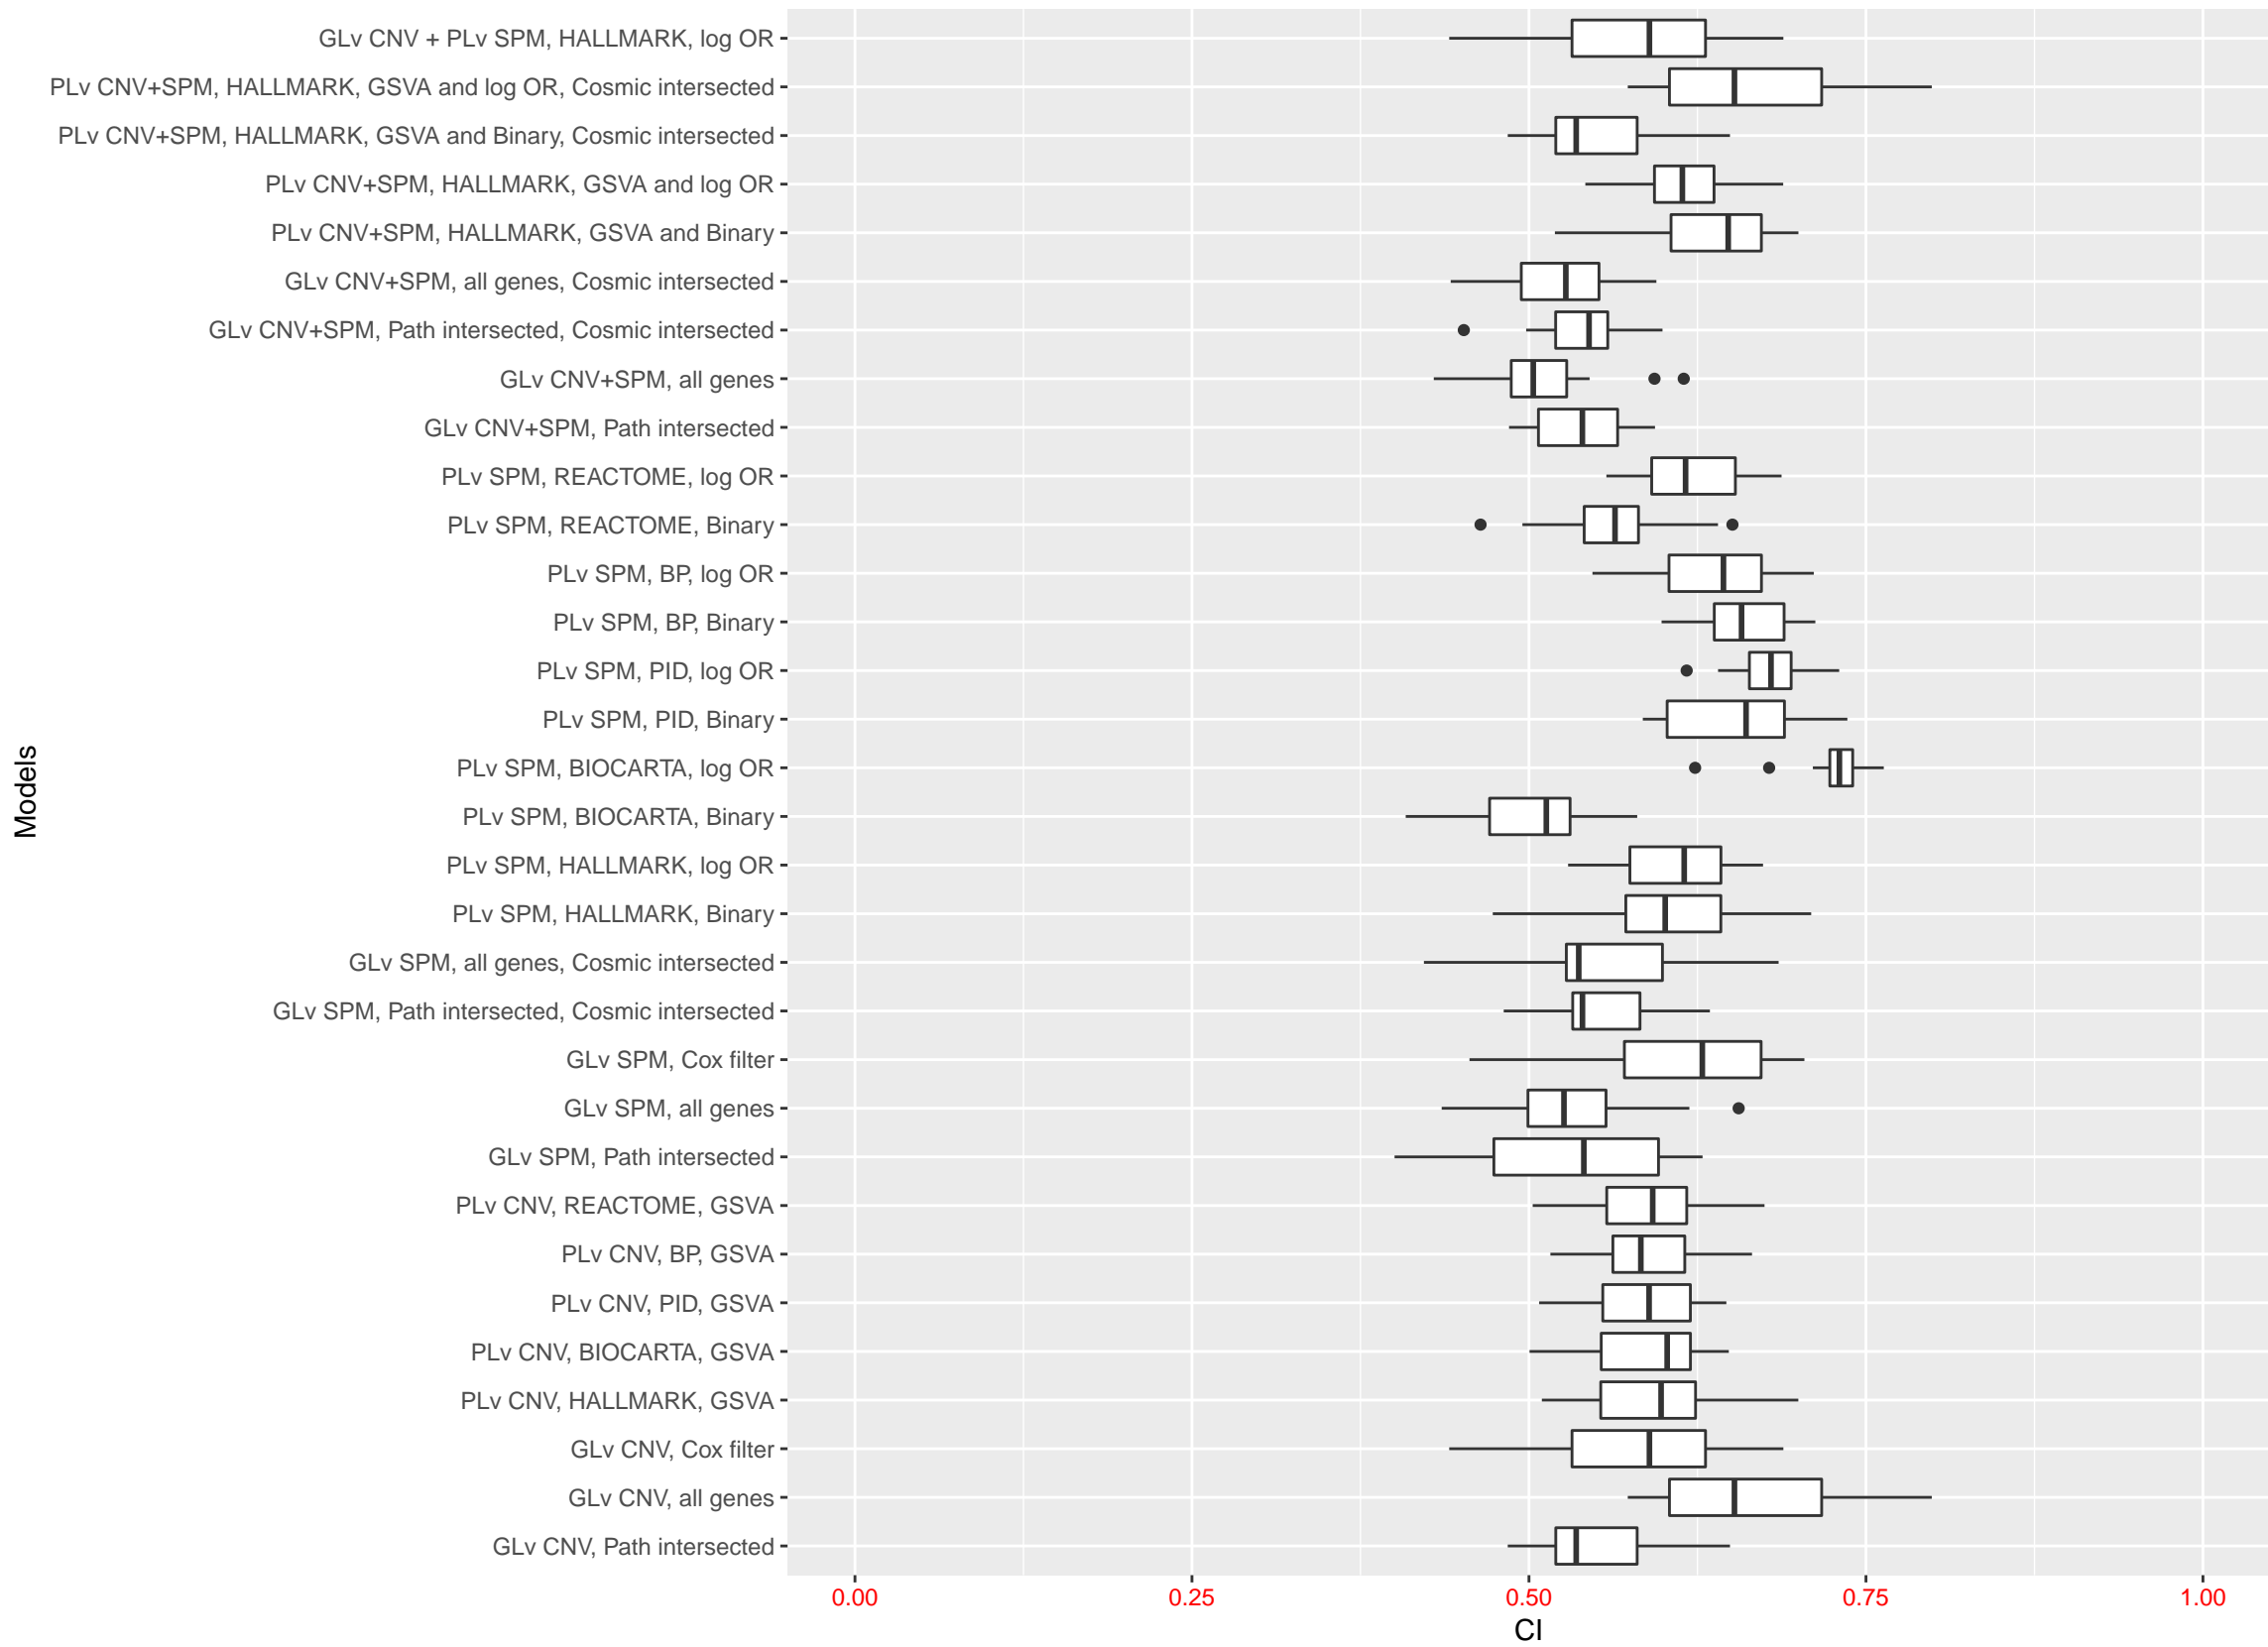

Figure S3 BLCA cohort

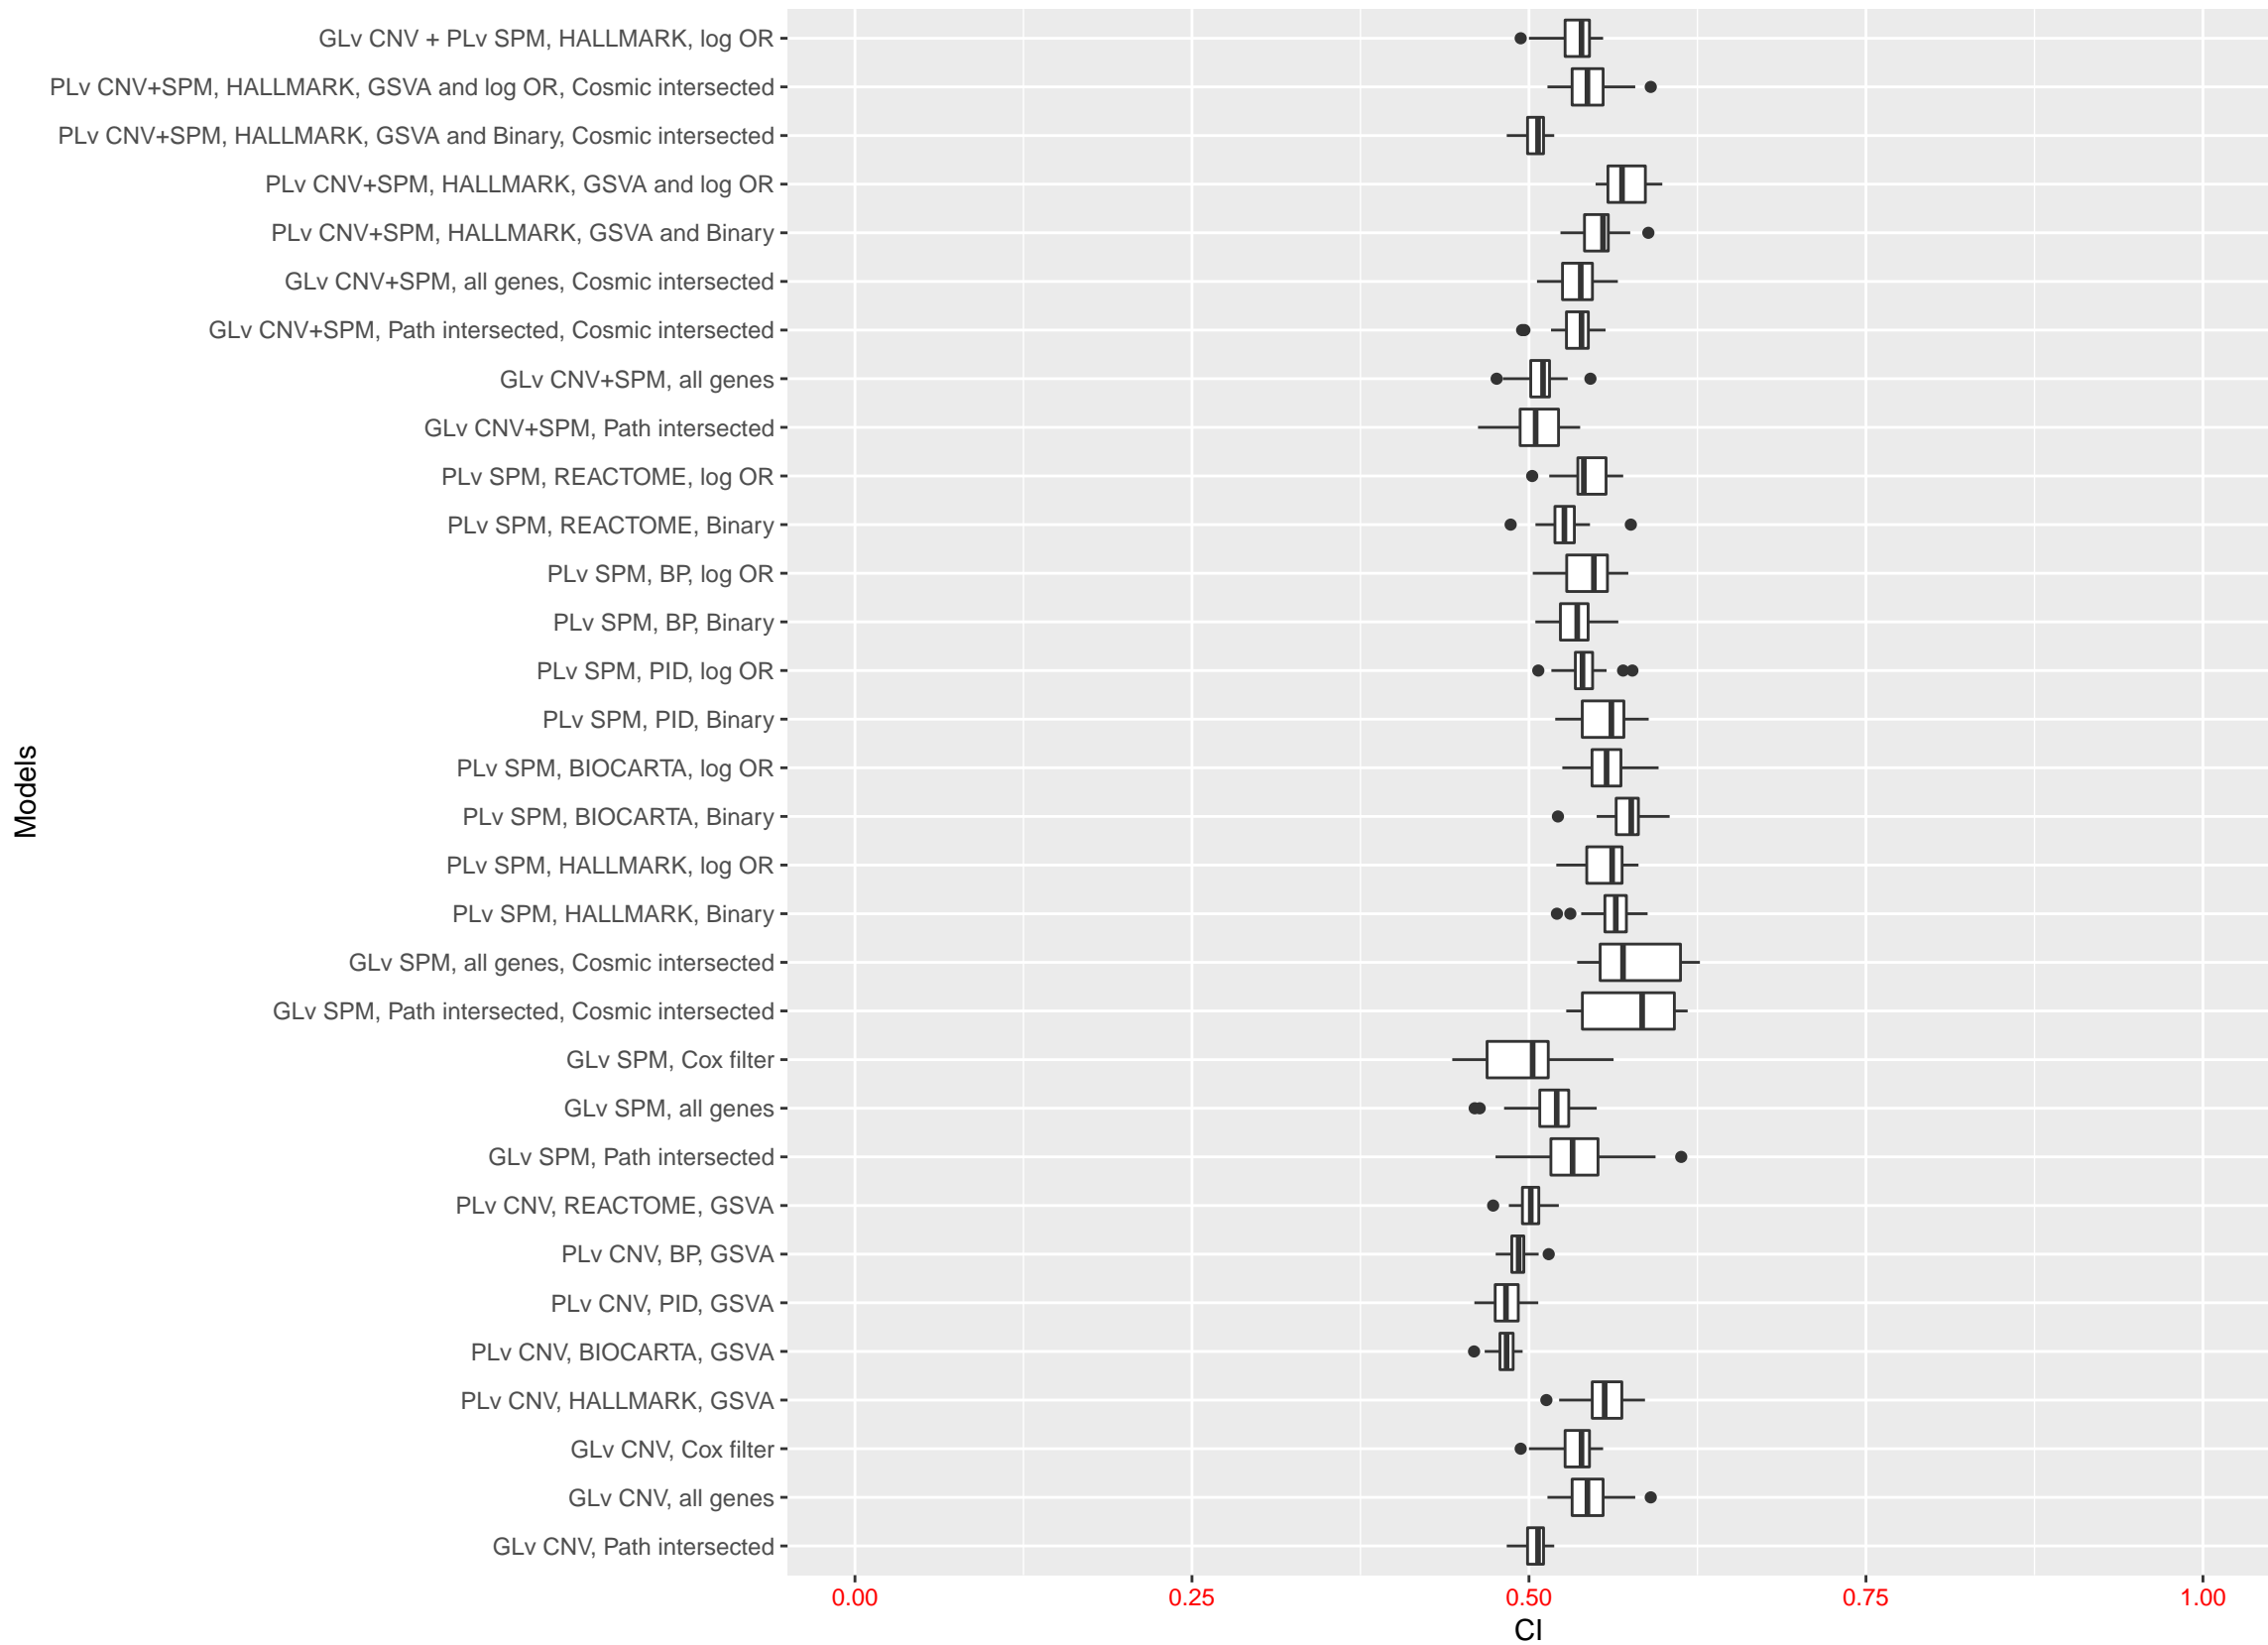

Figure S4 BRCA cohort

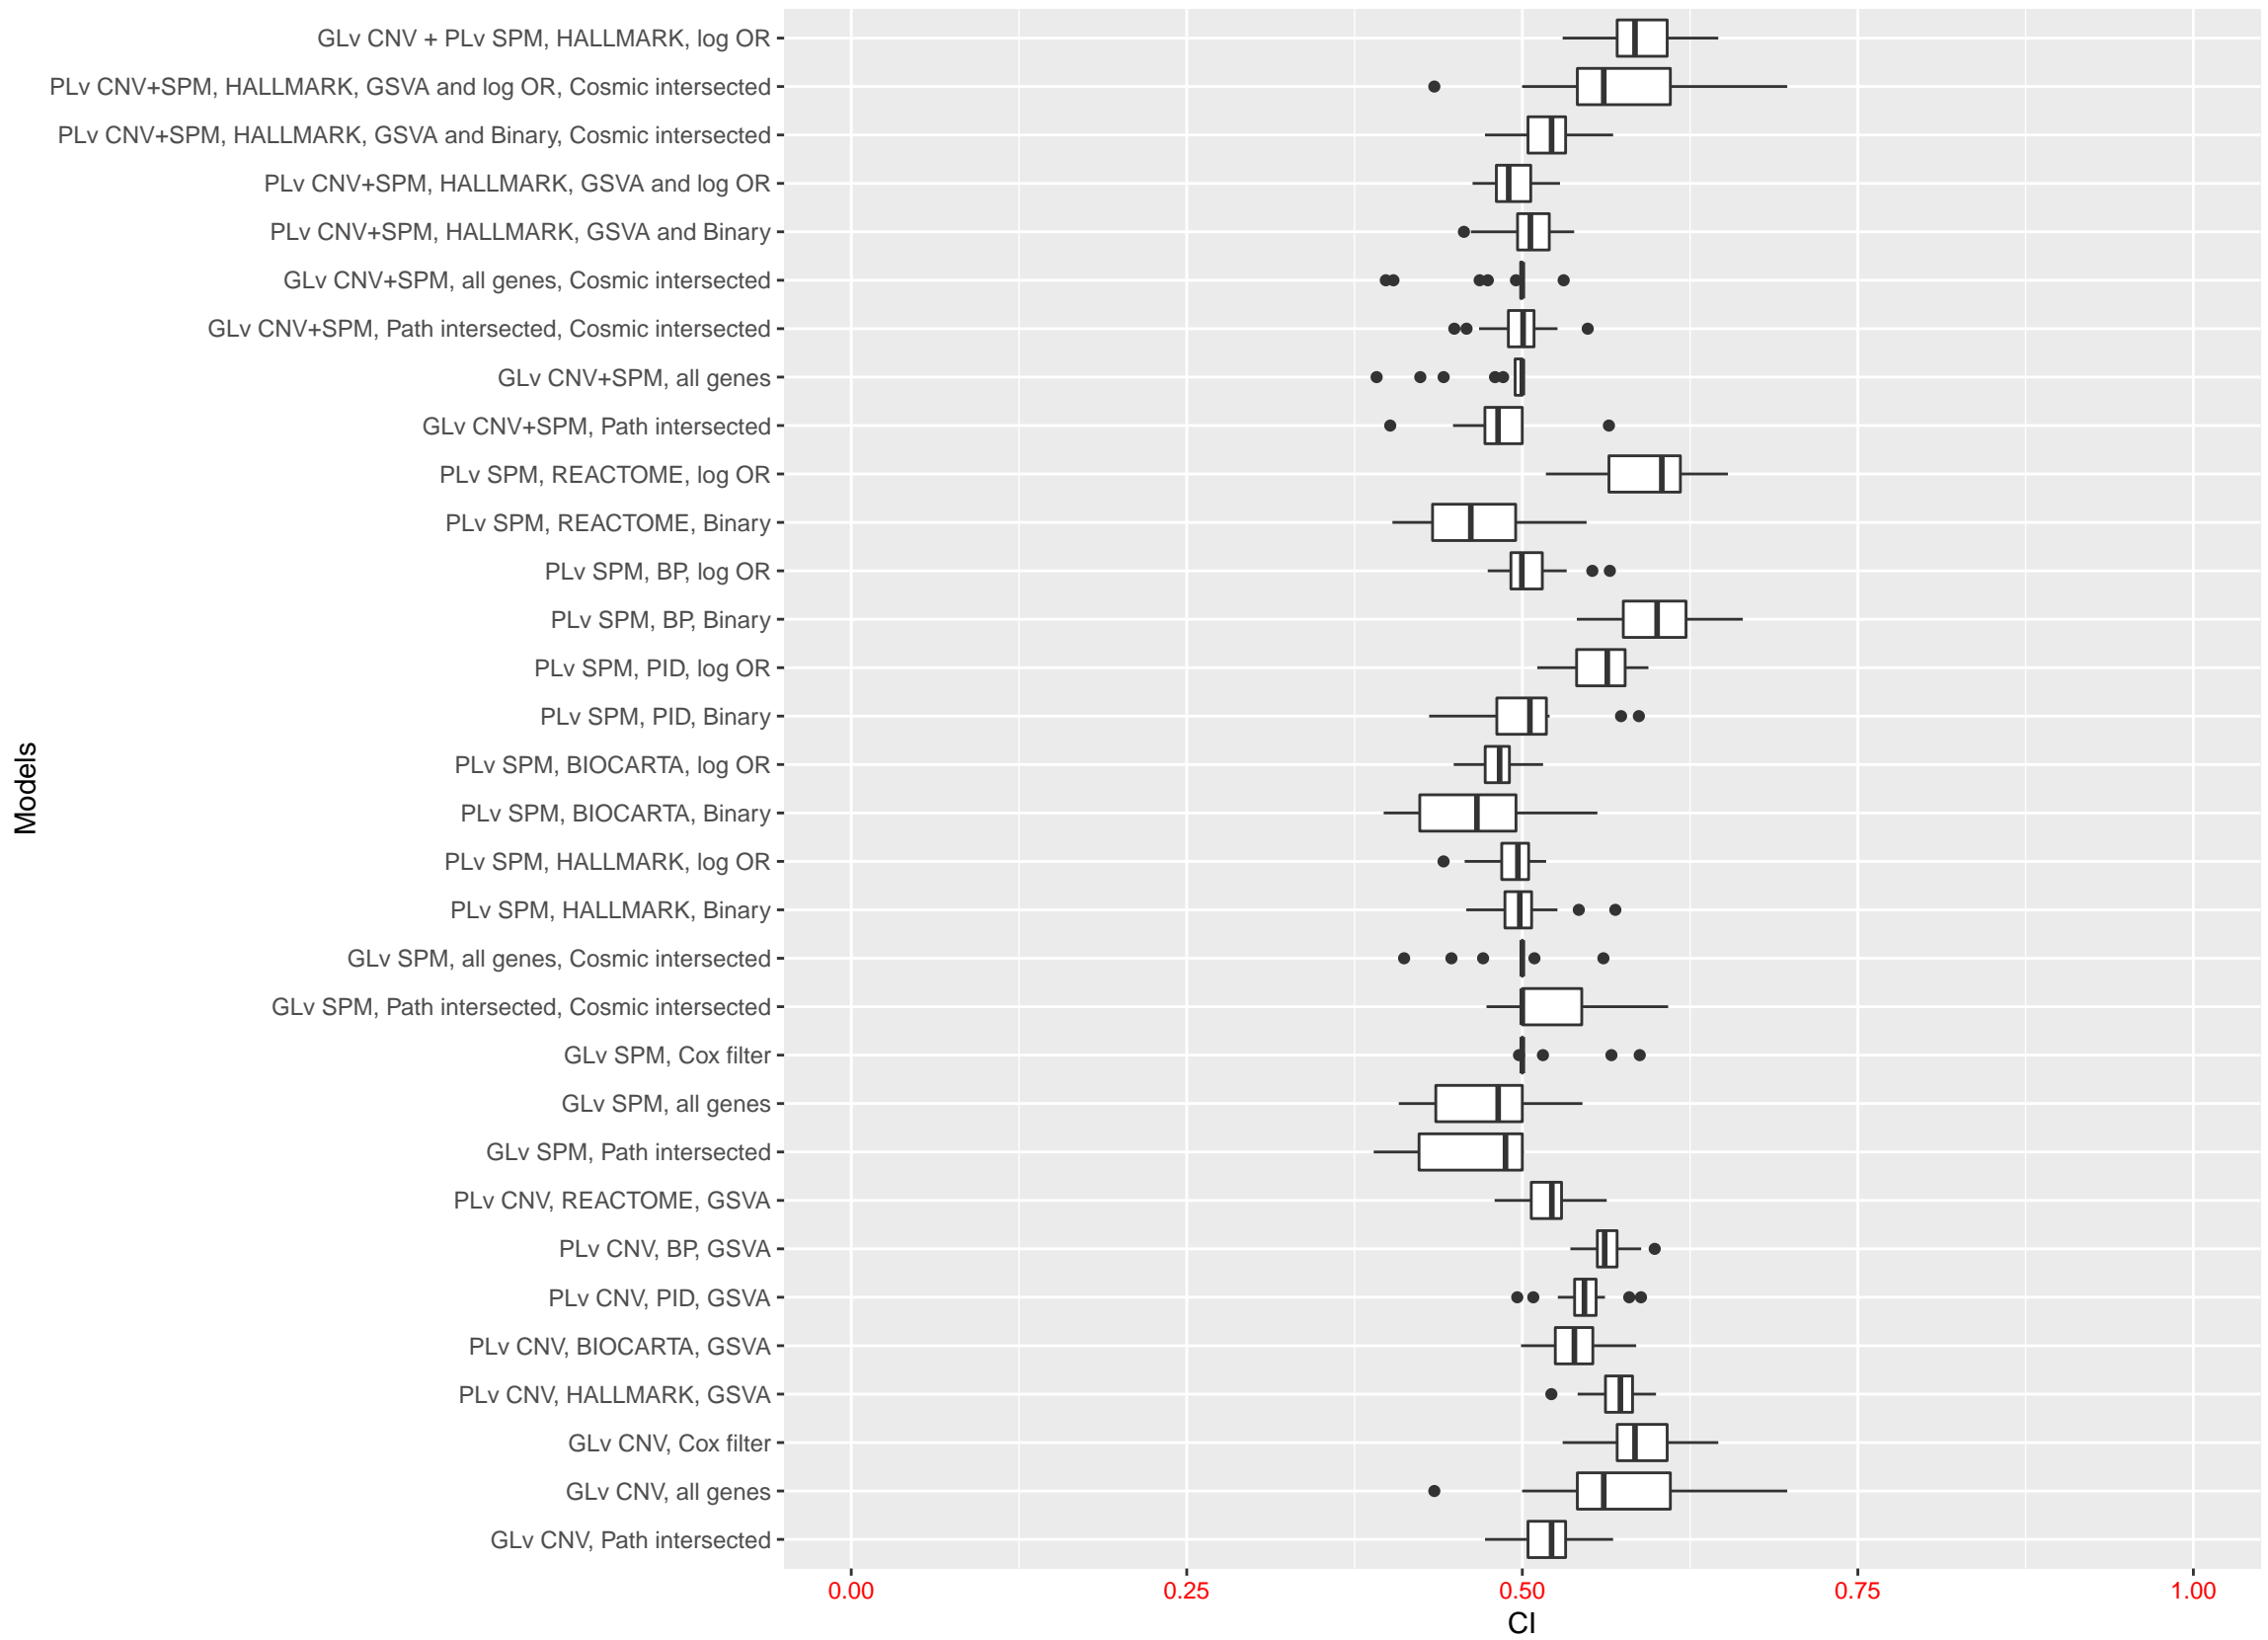

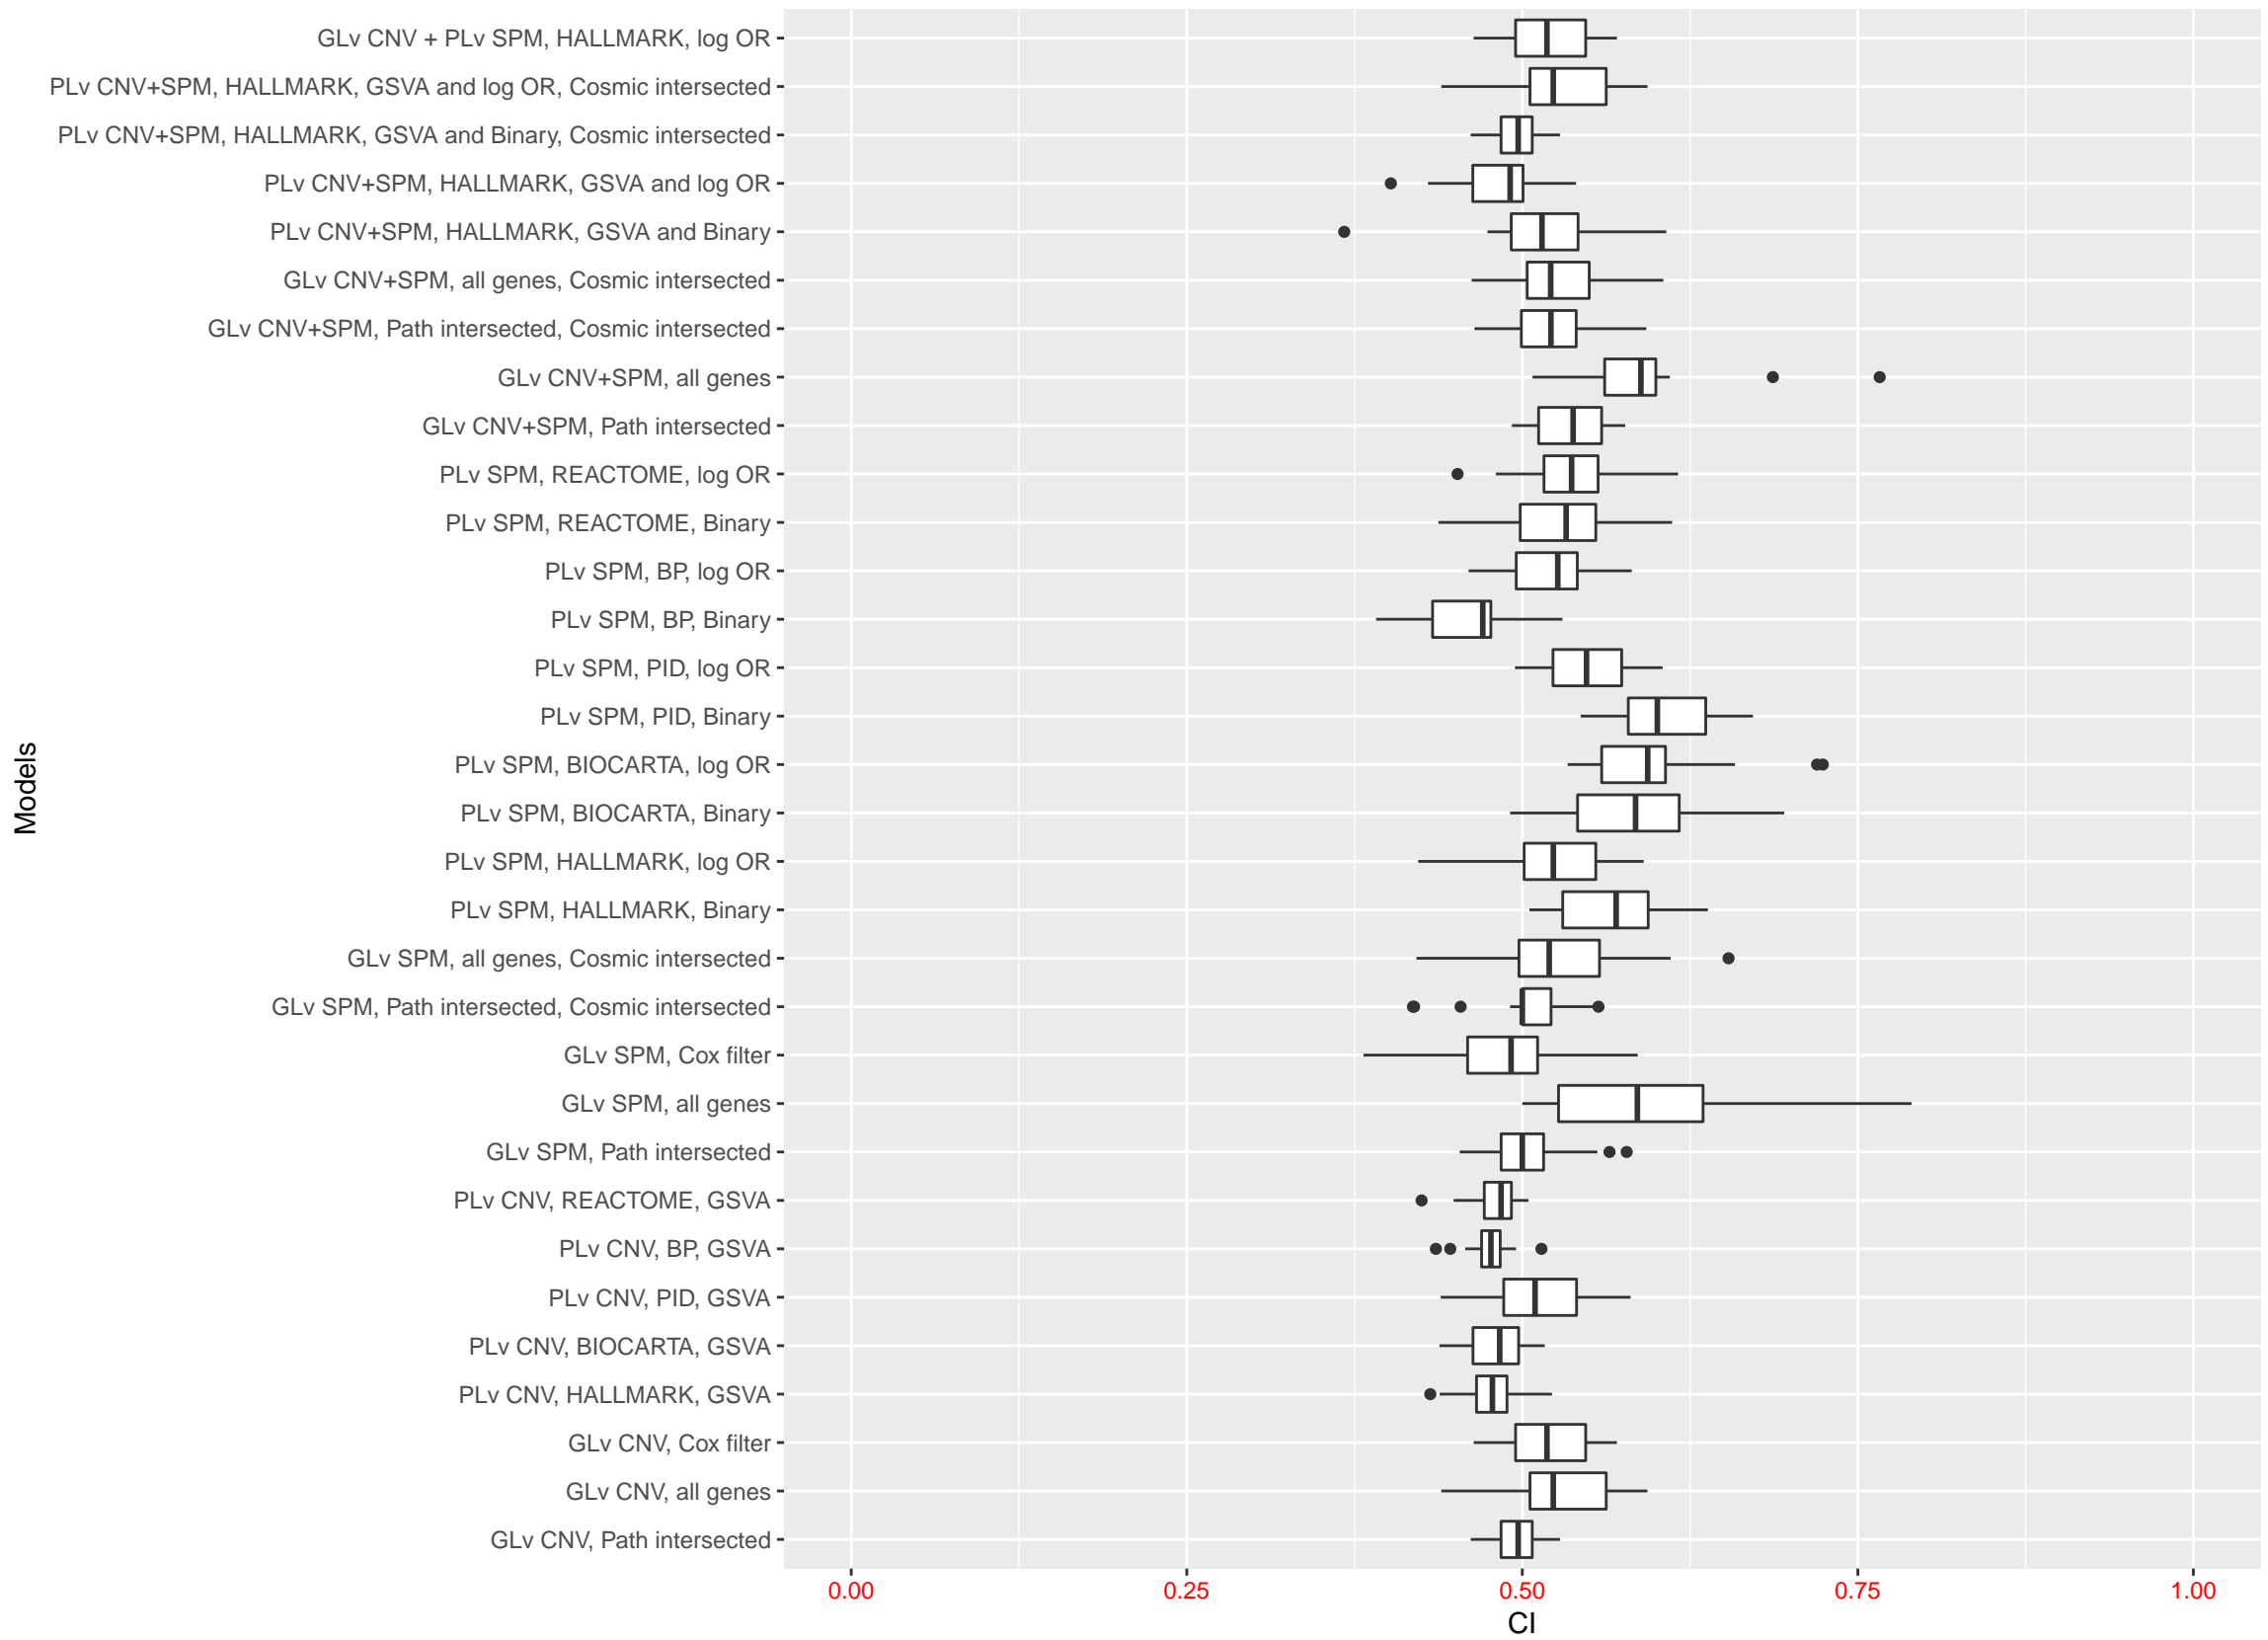

Figure S6 COAD cohort

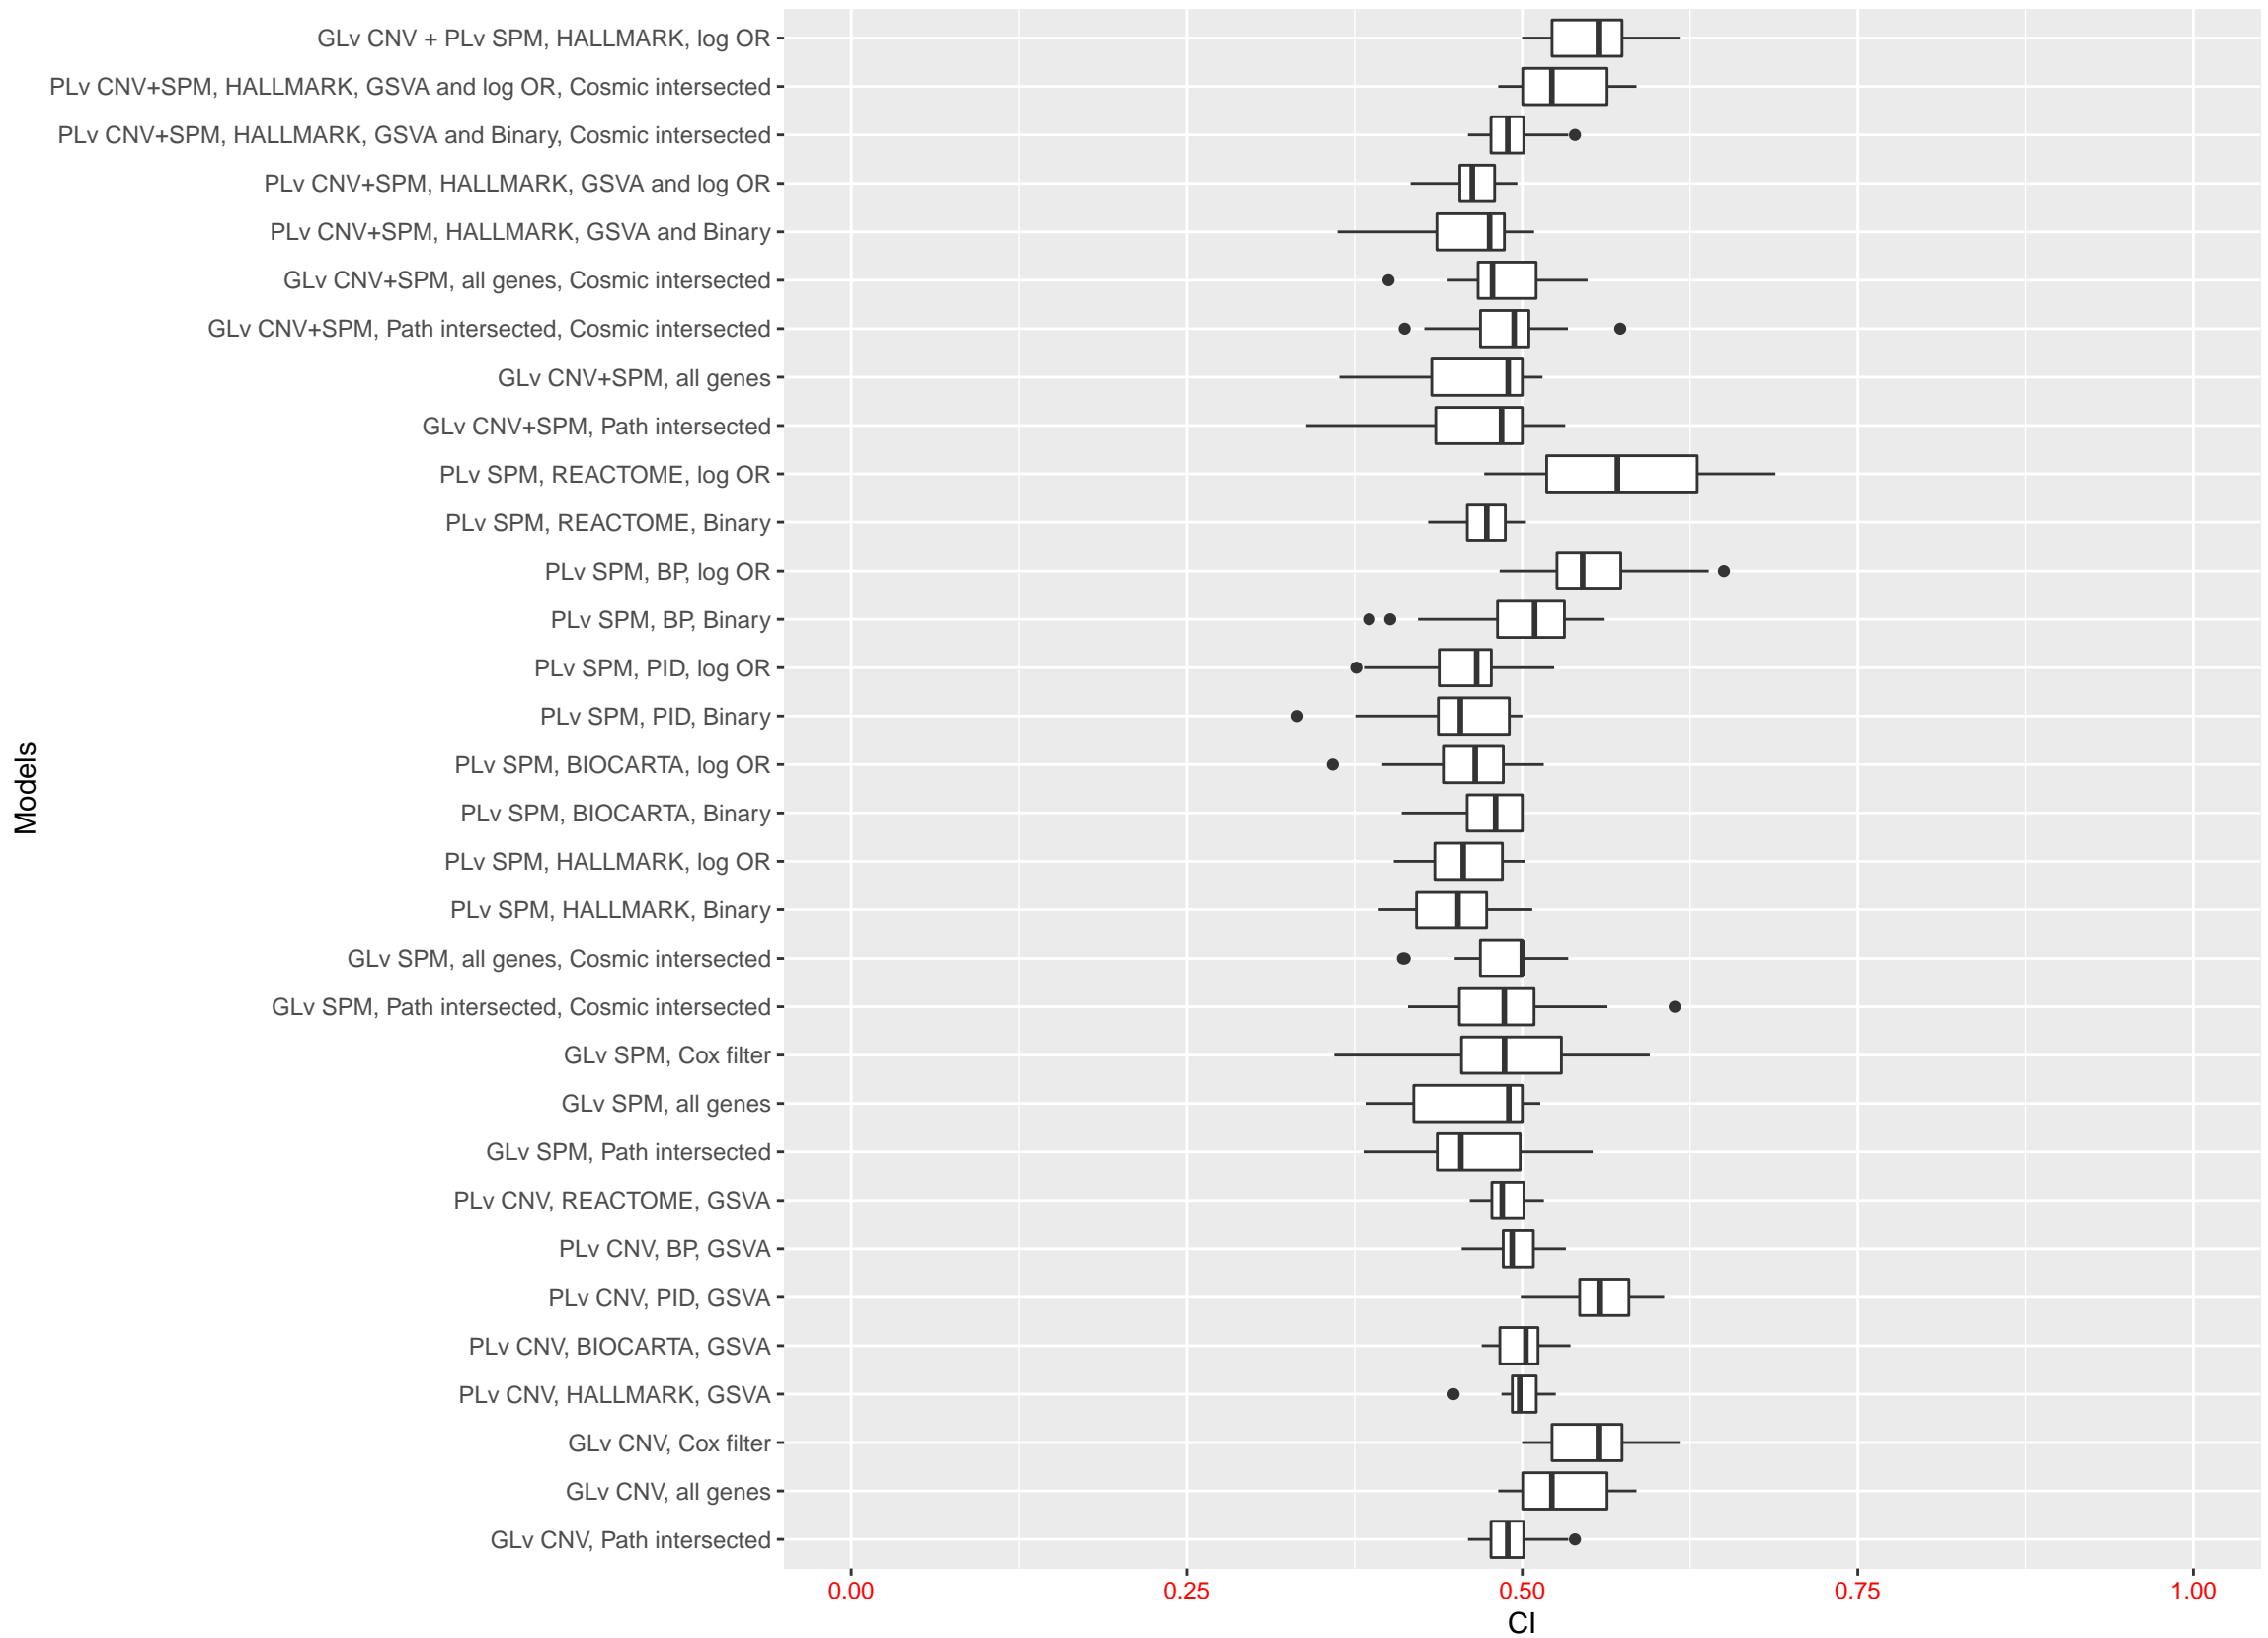

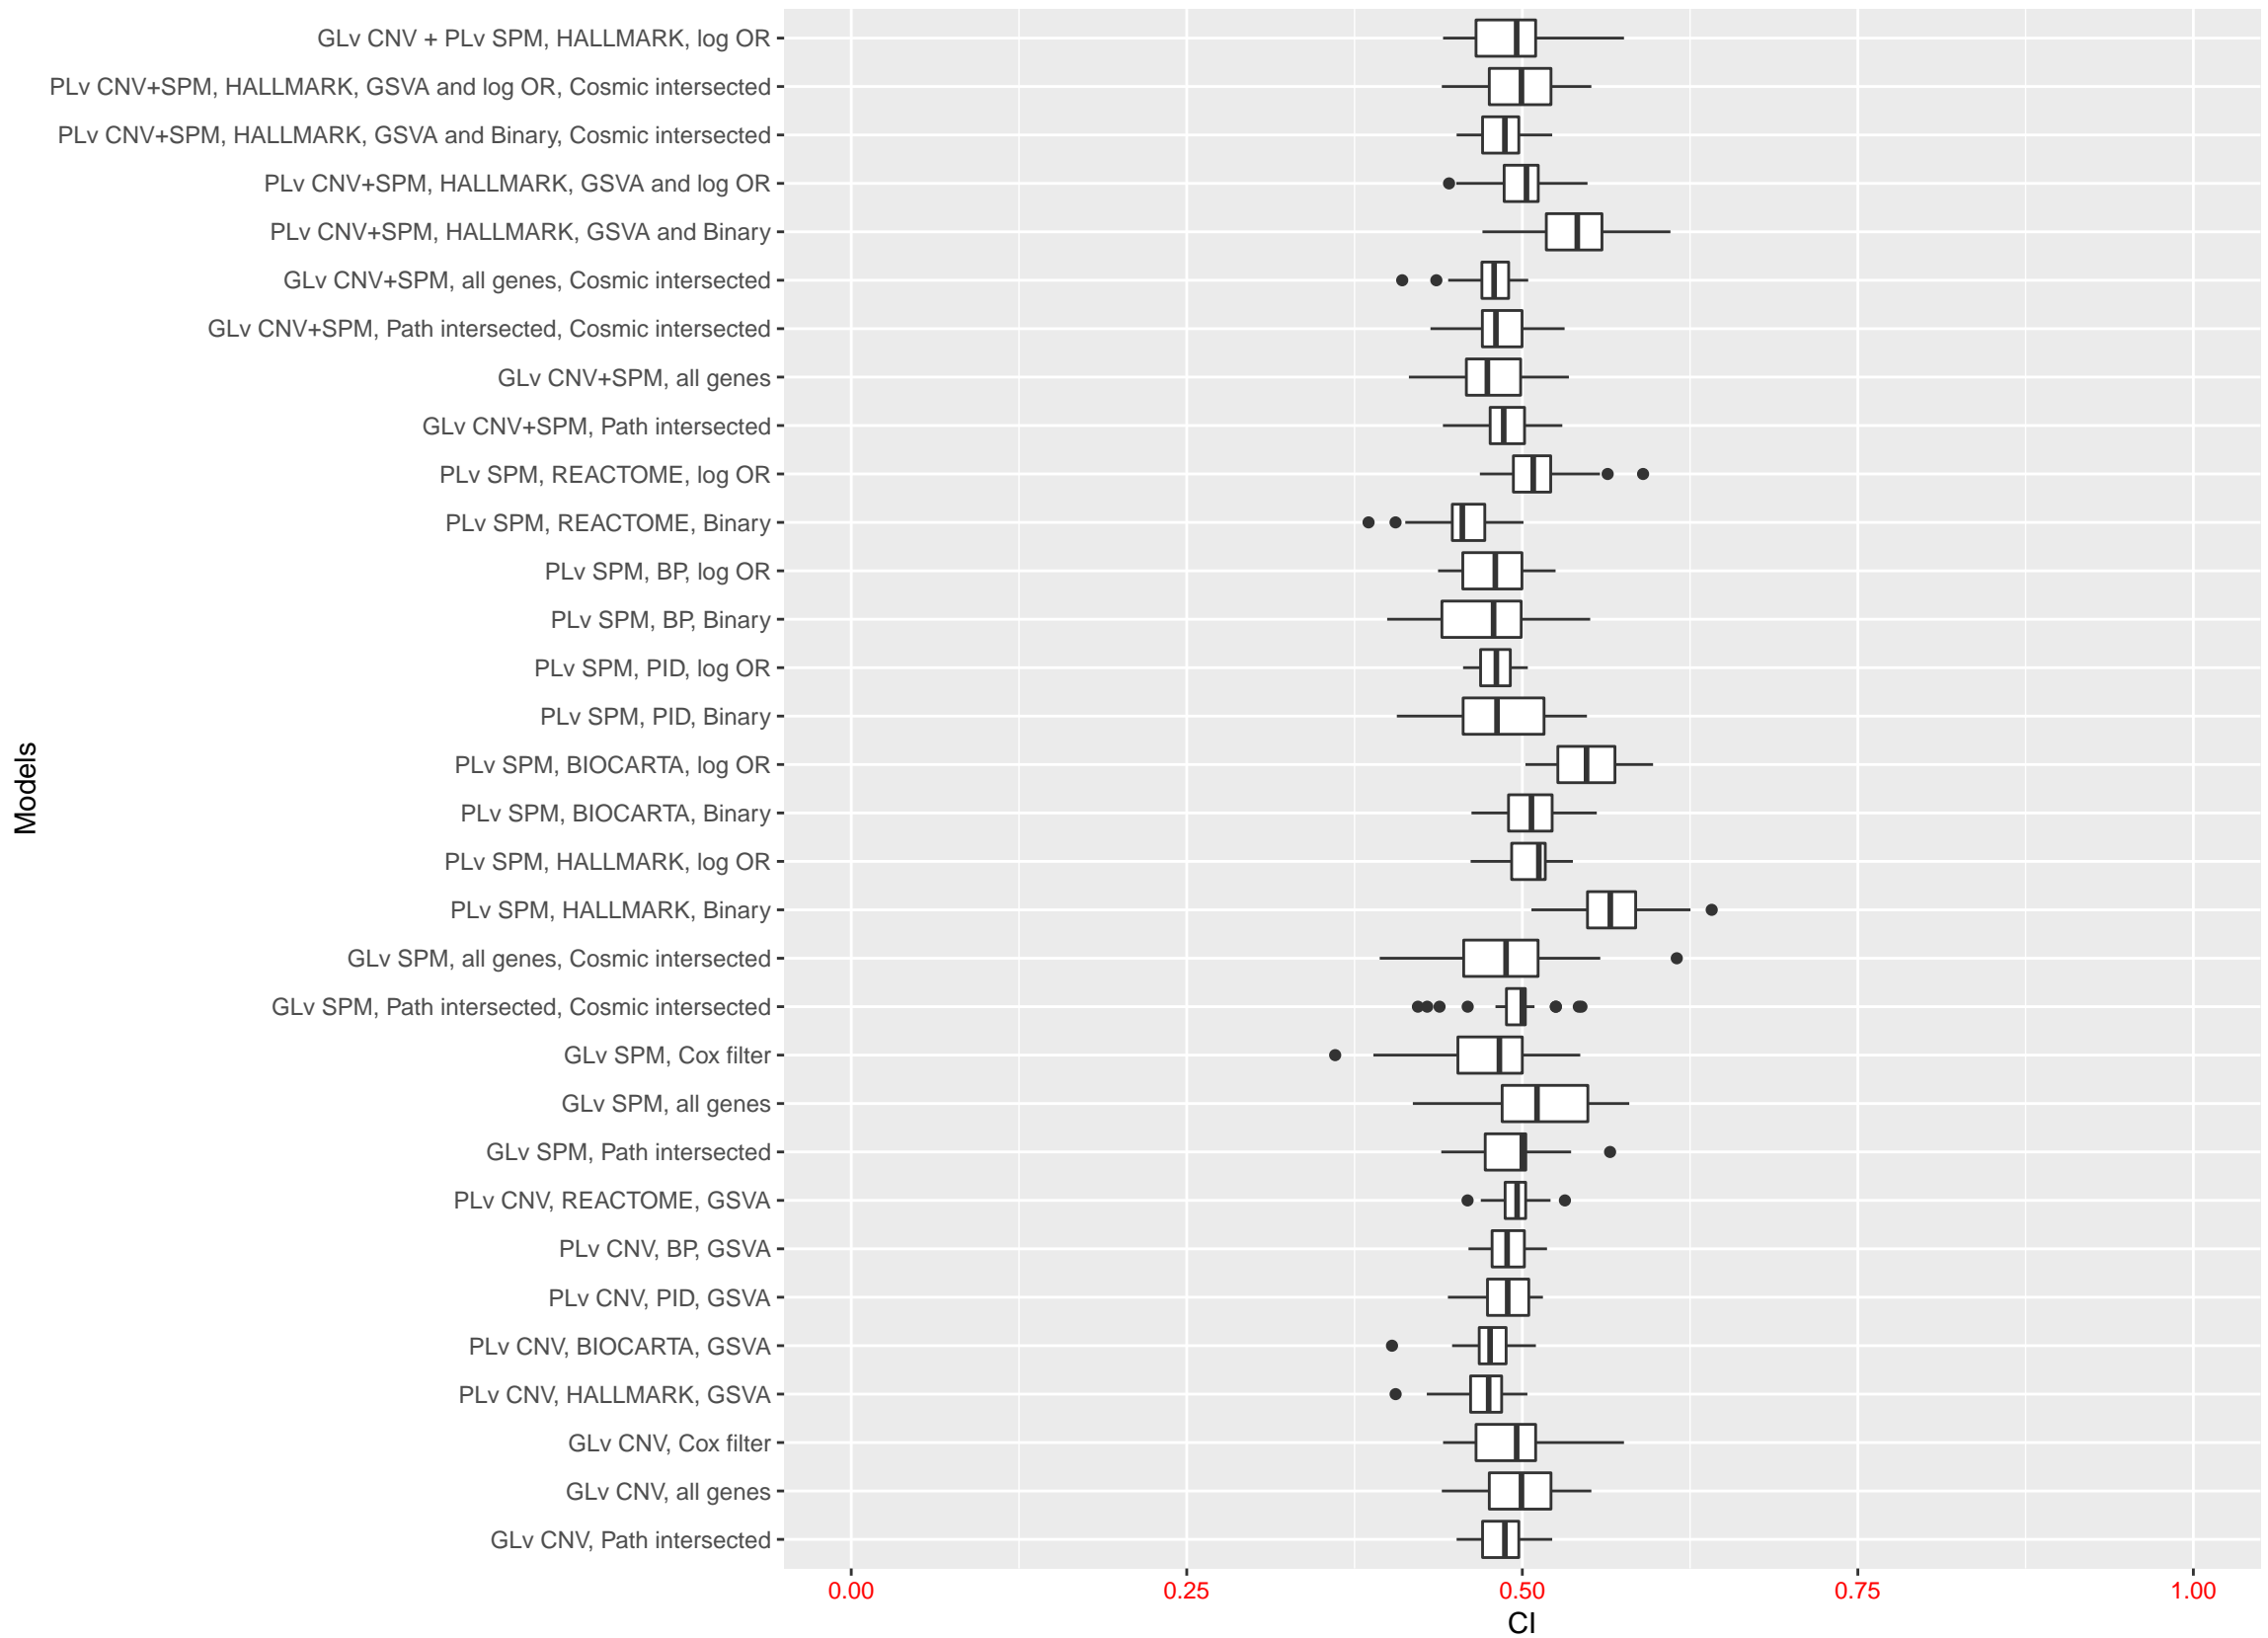

Figure S8 GBM cohort

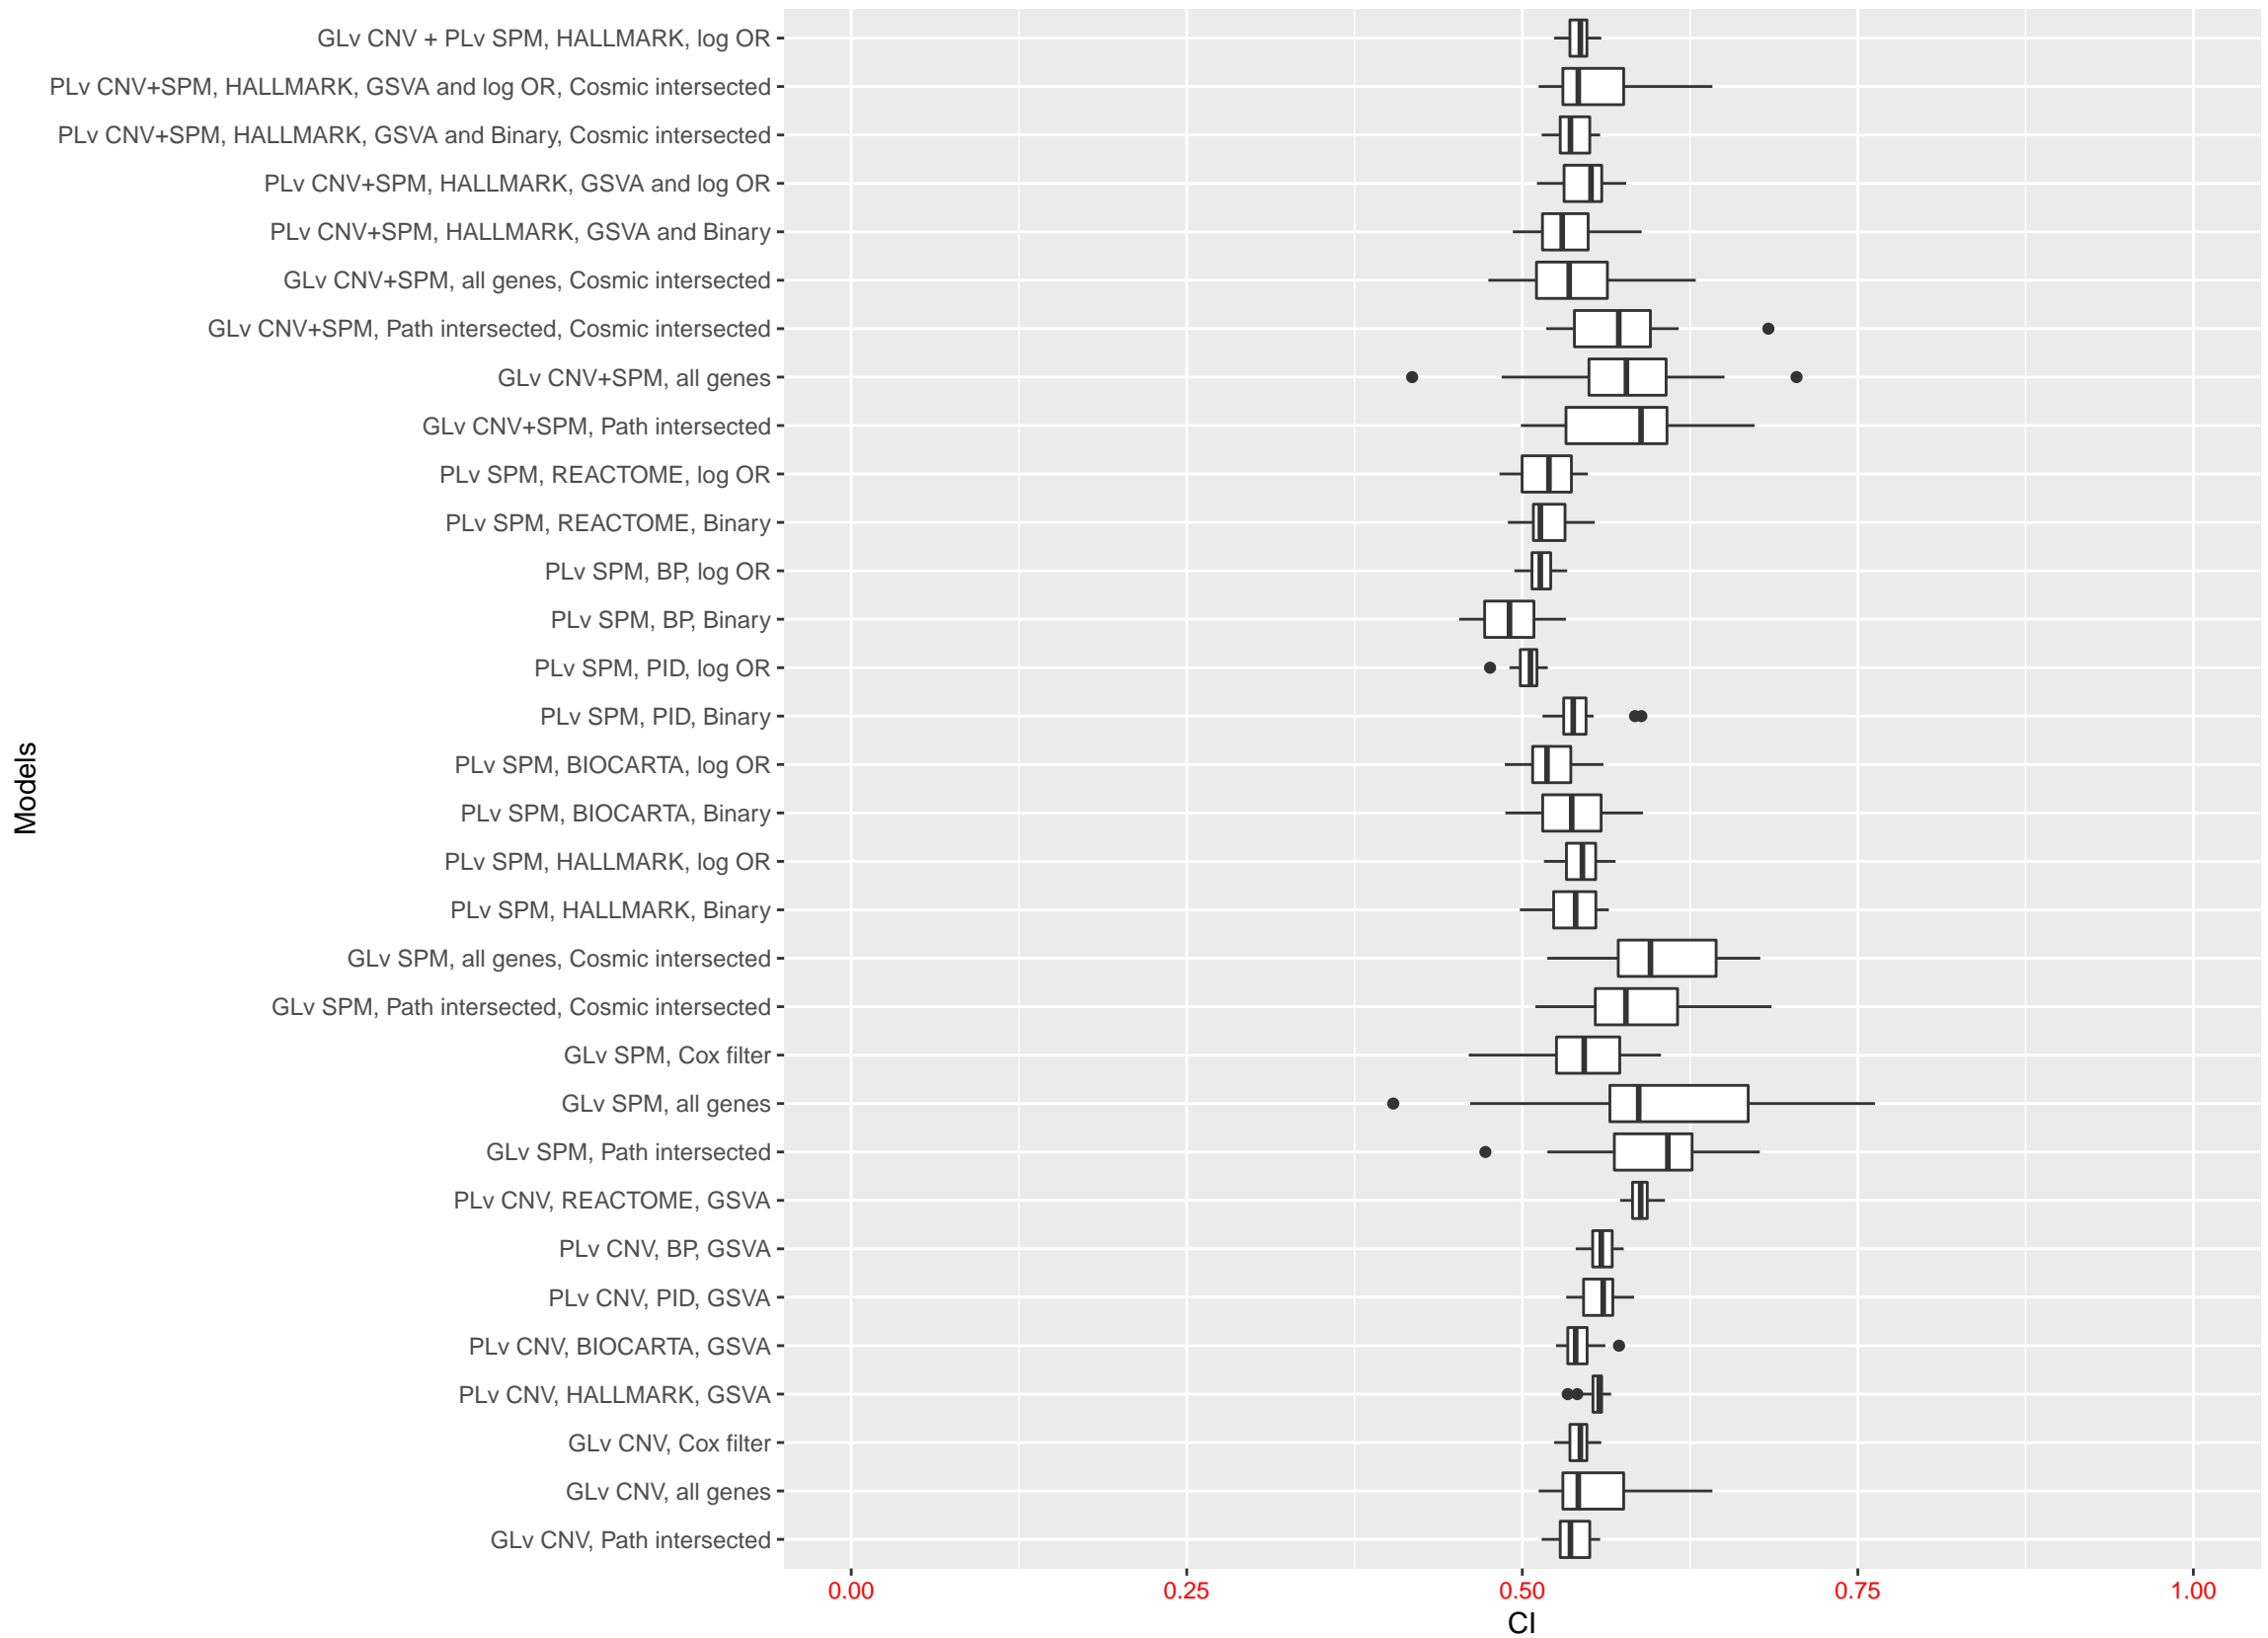

Figure S9 HNSC cohort

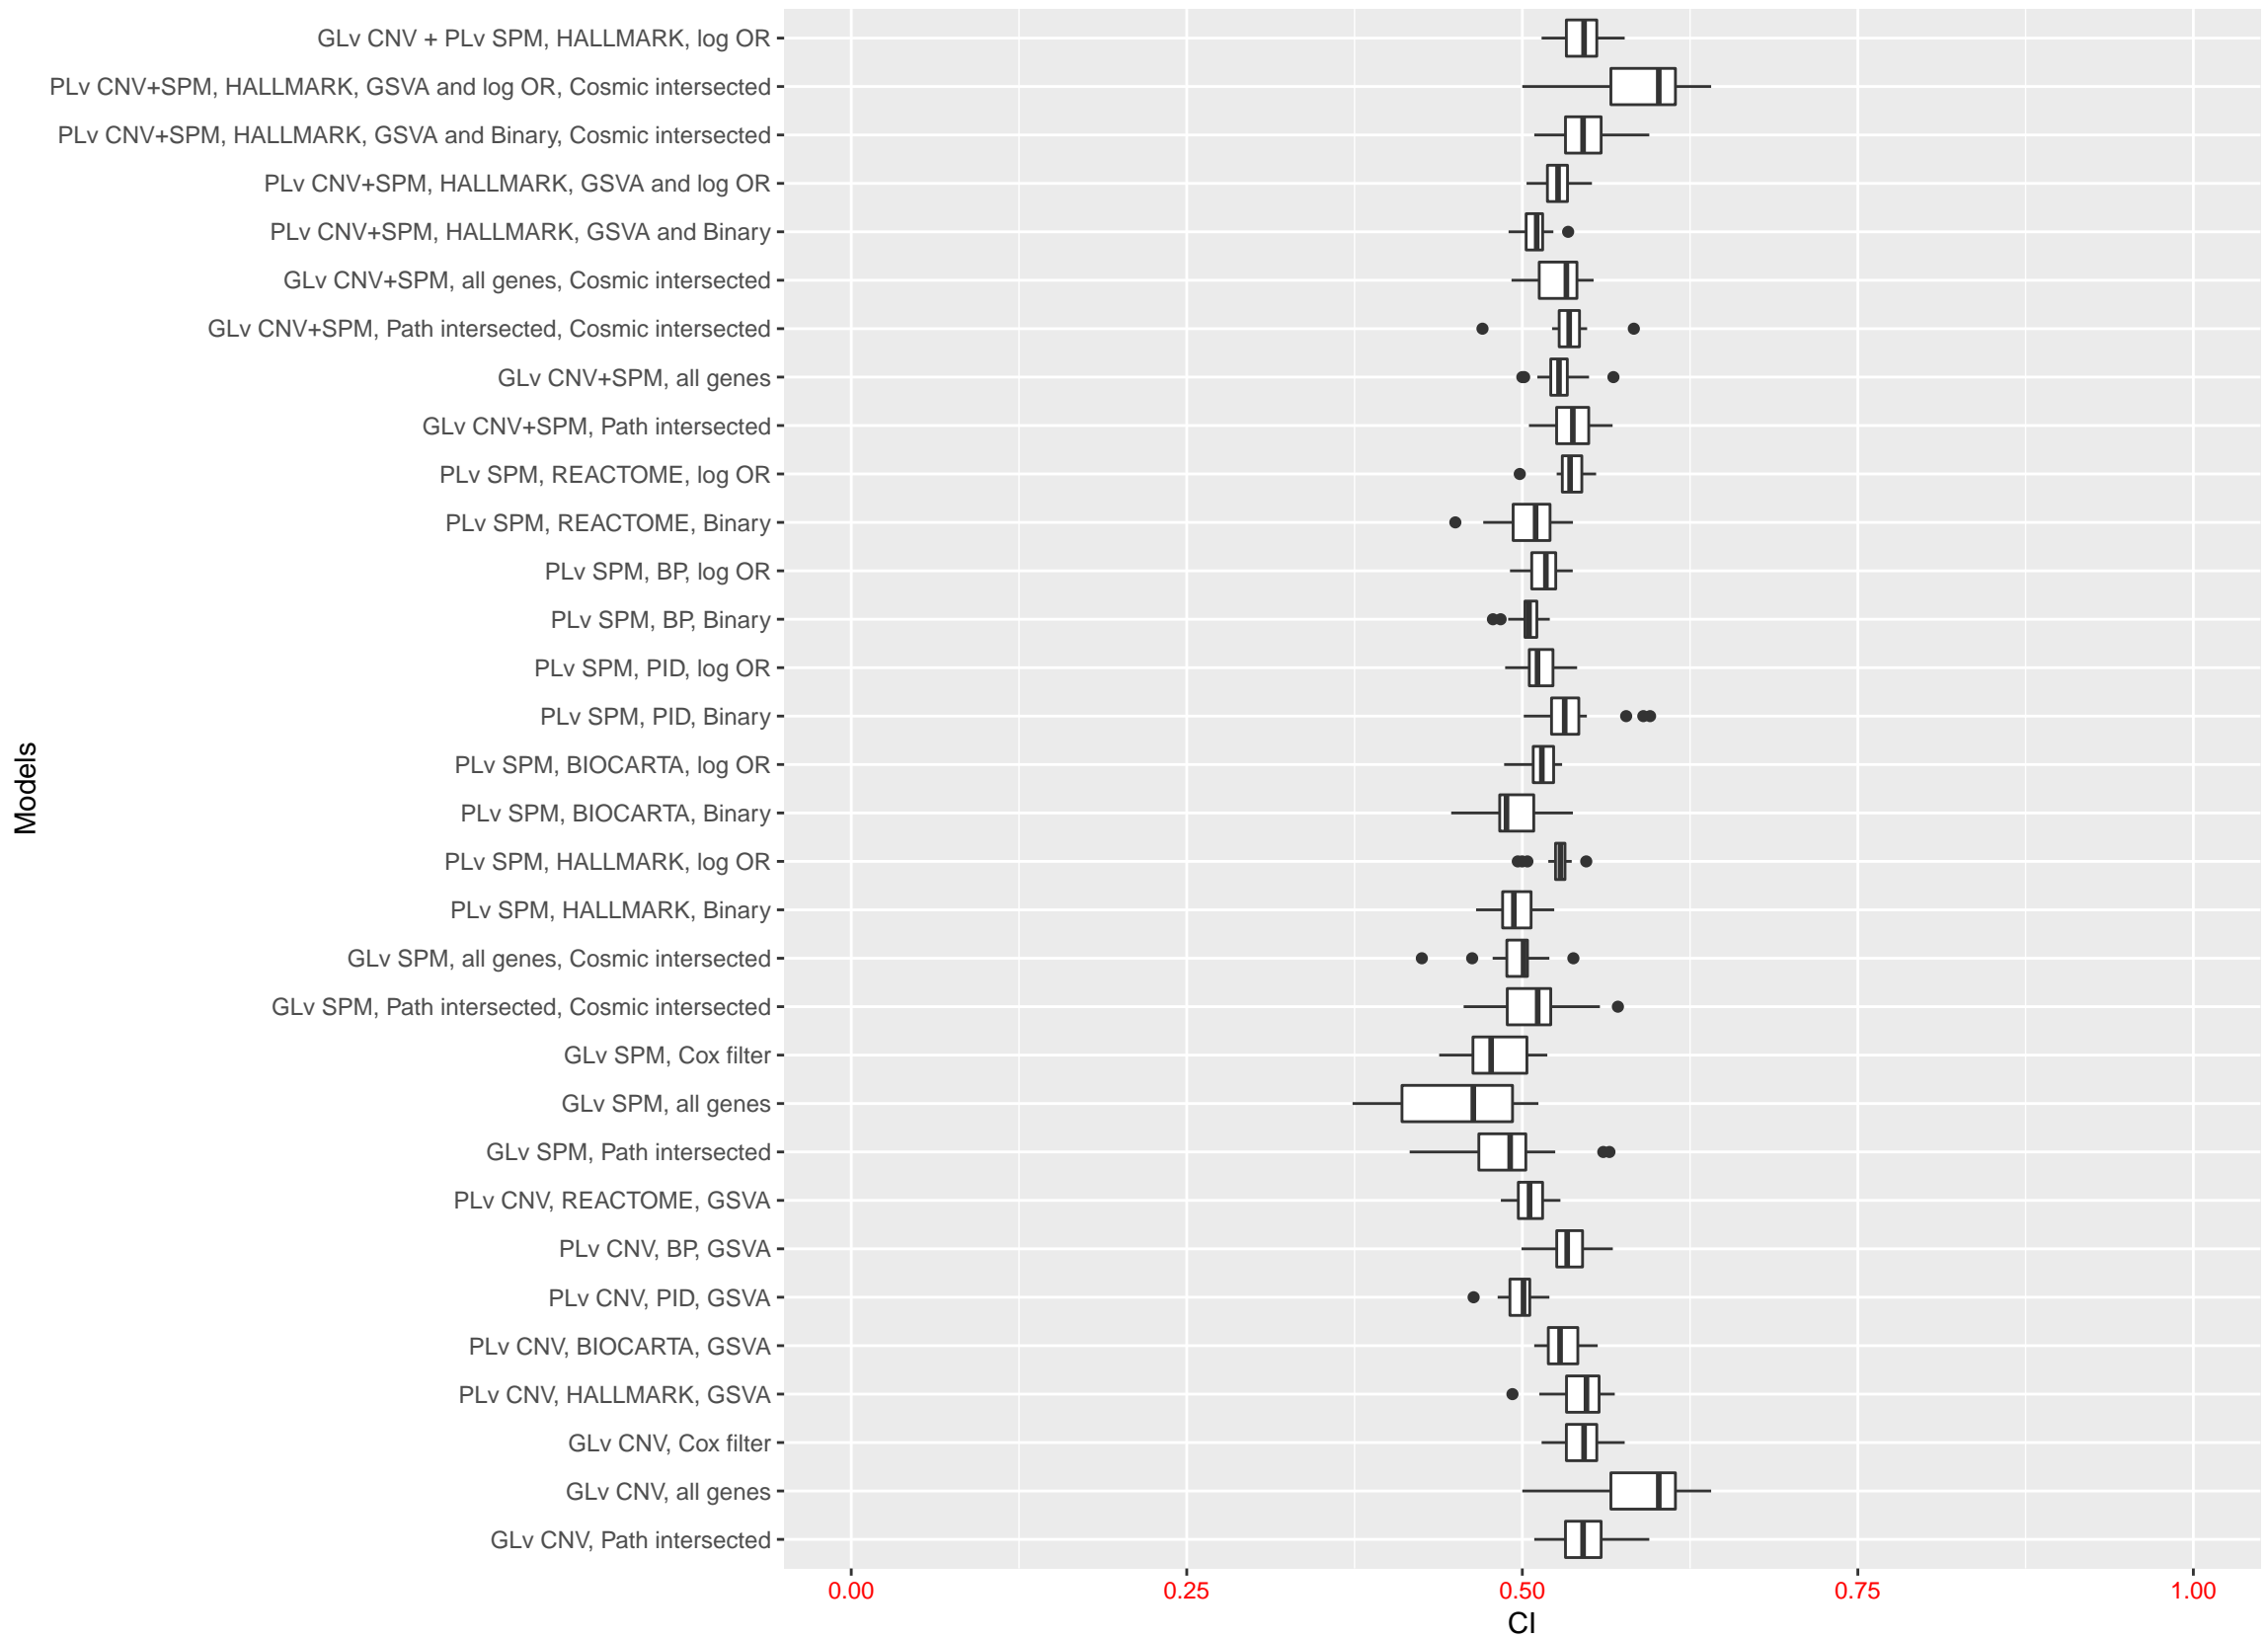

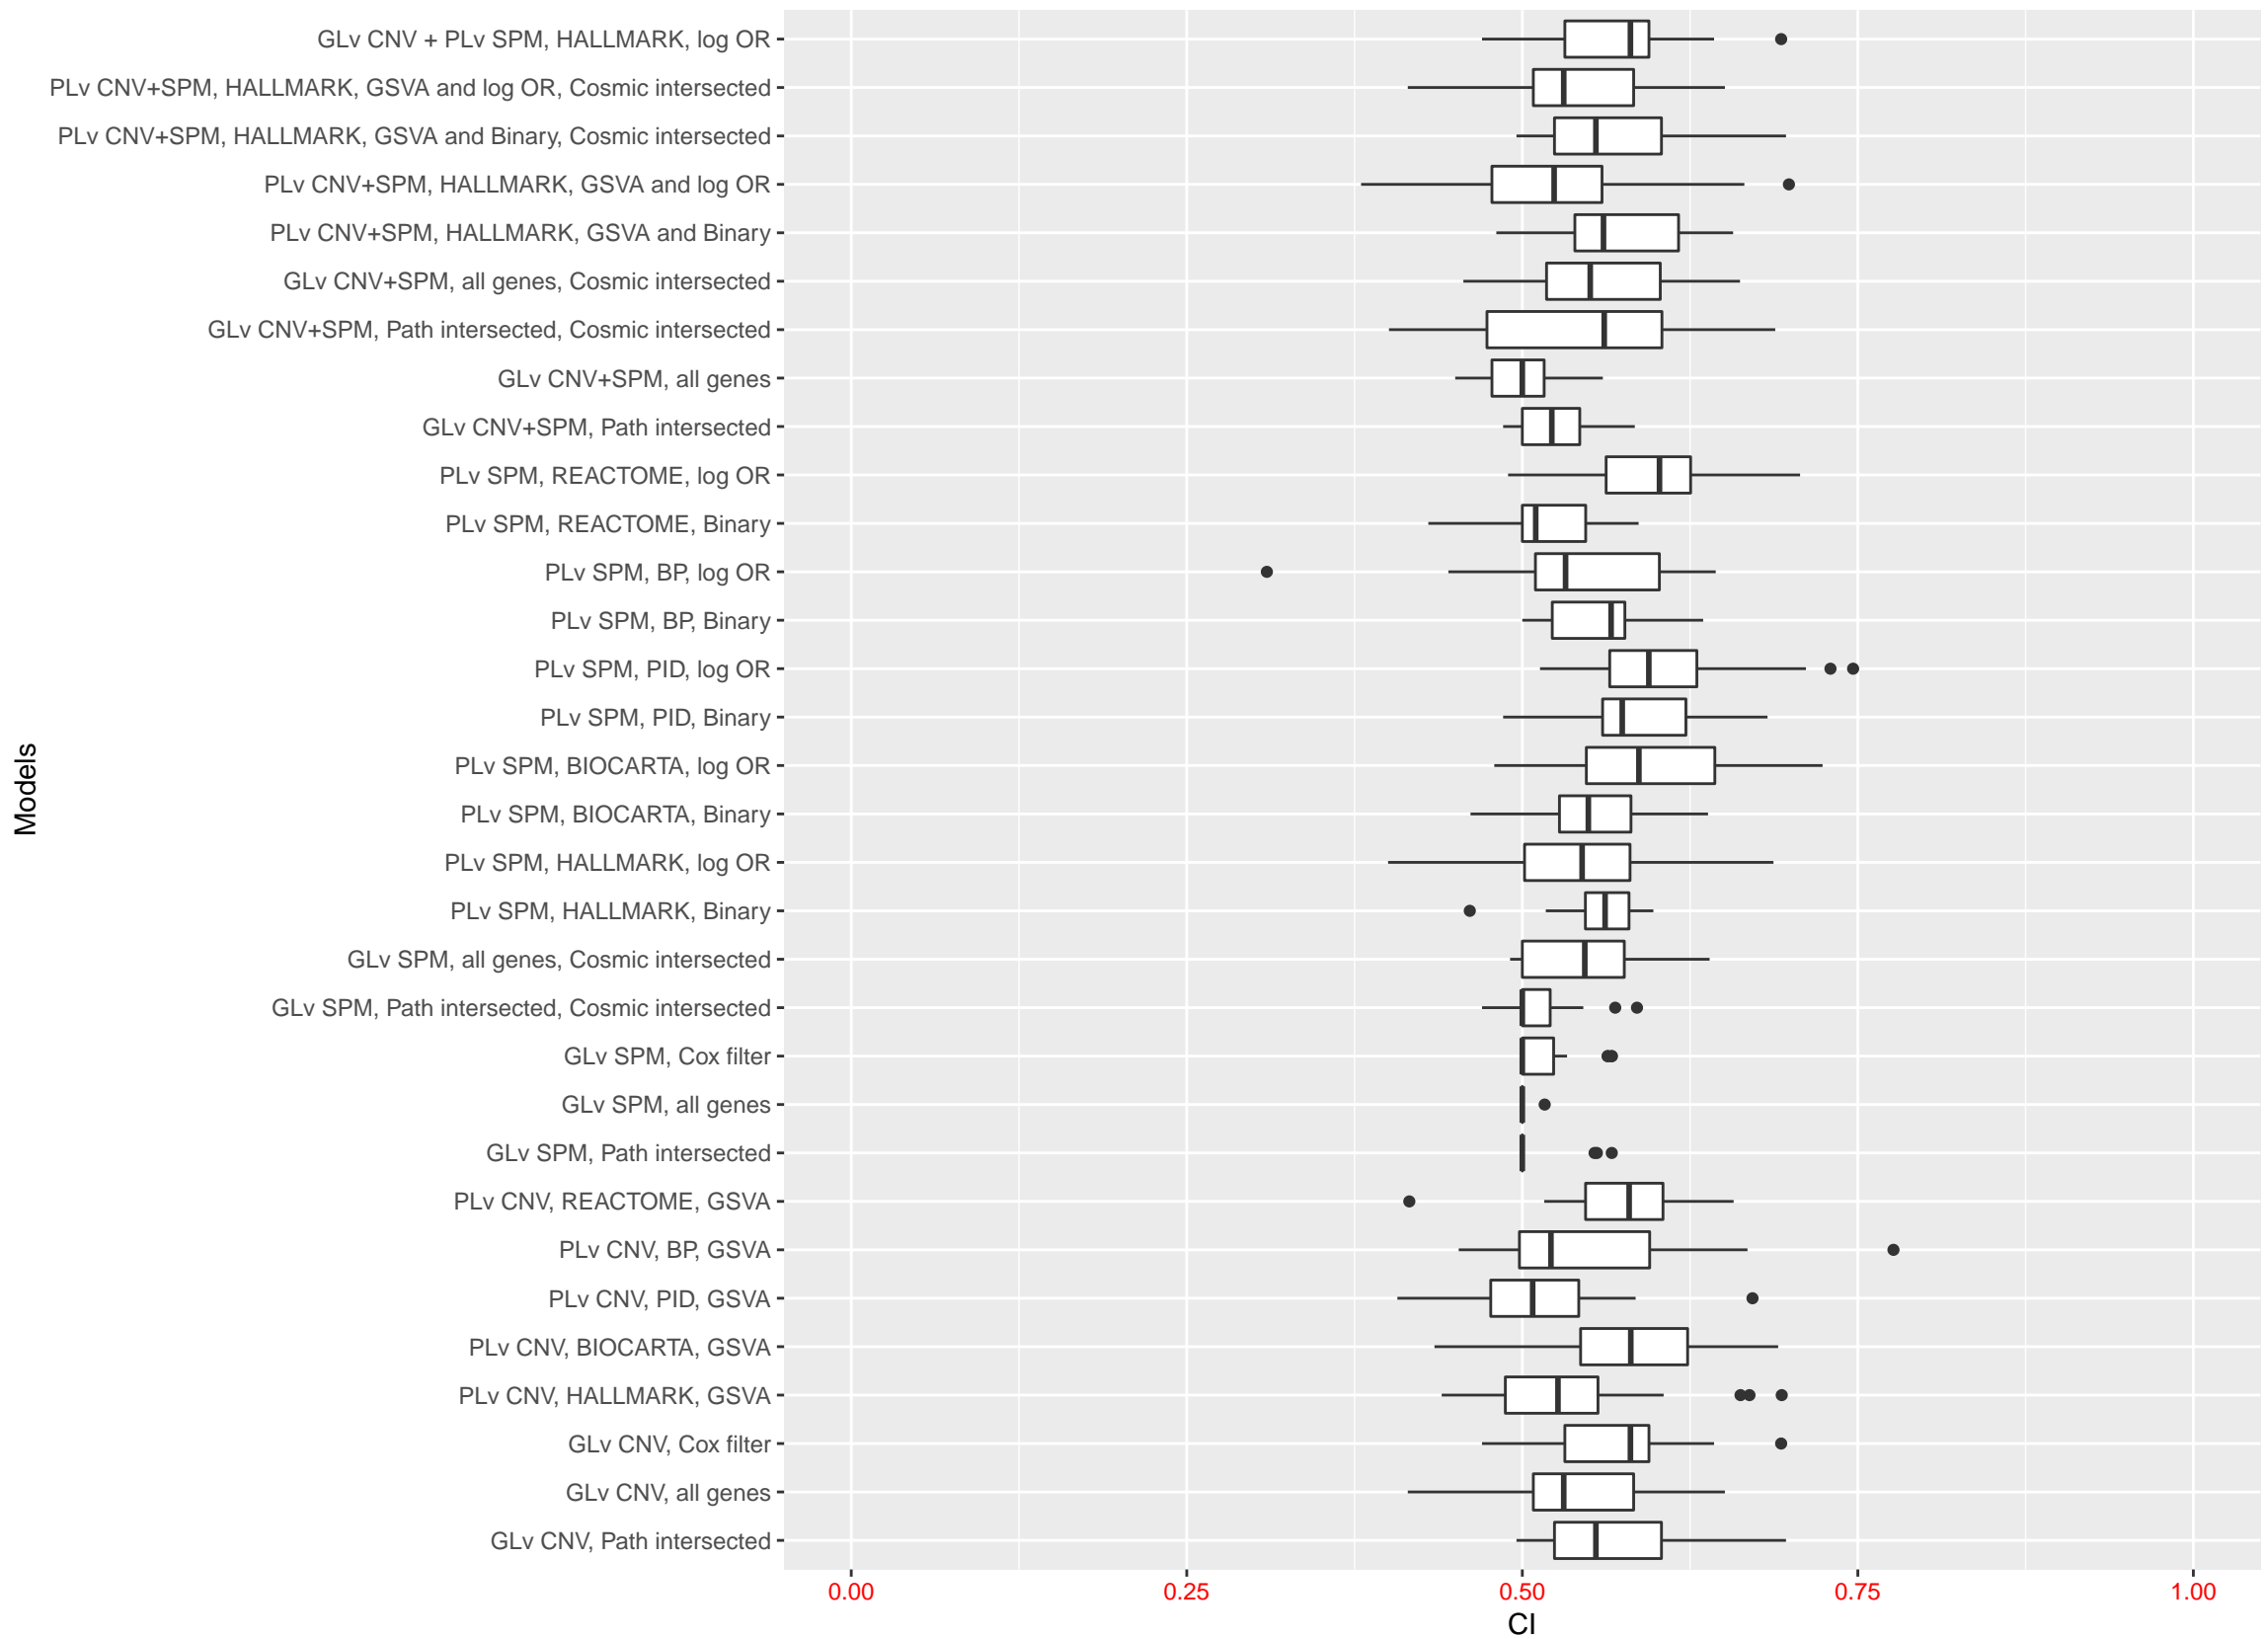

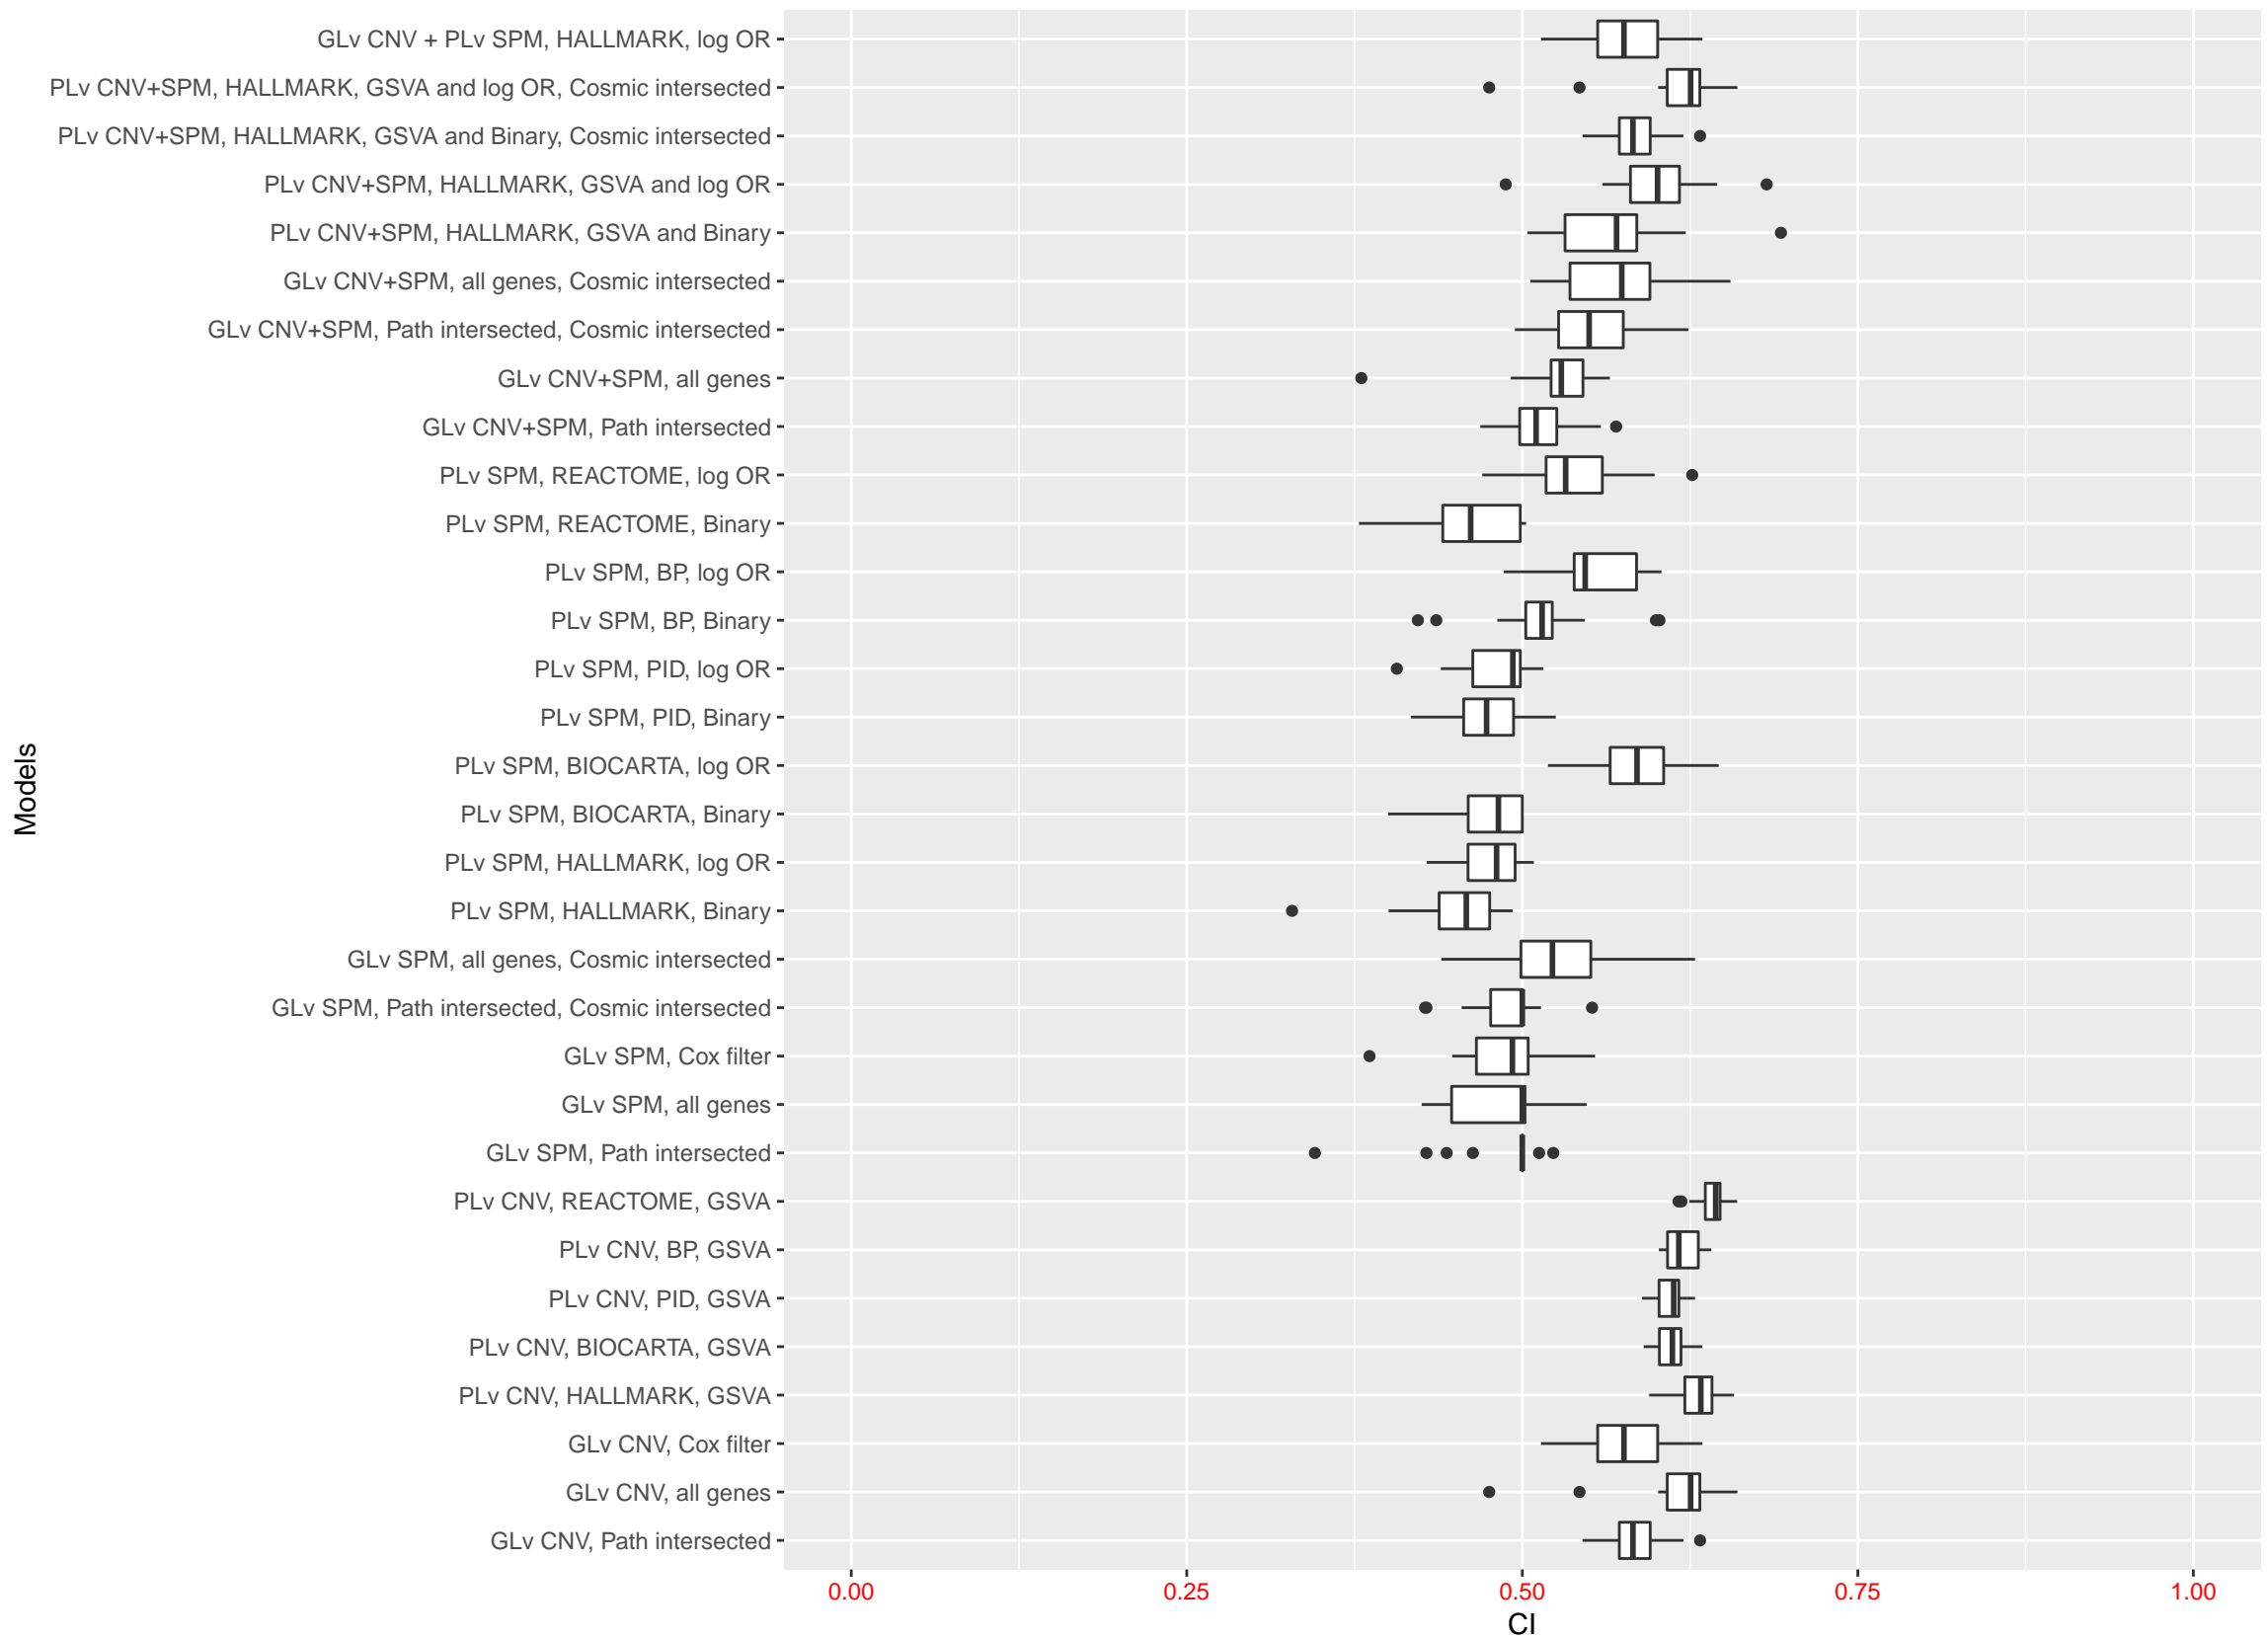

Figure S12 KIRP cohort

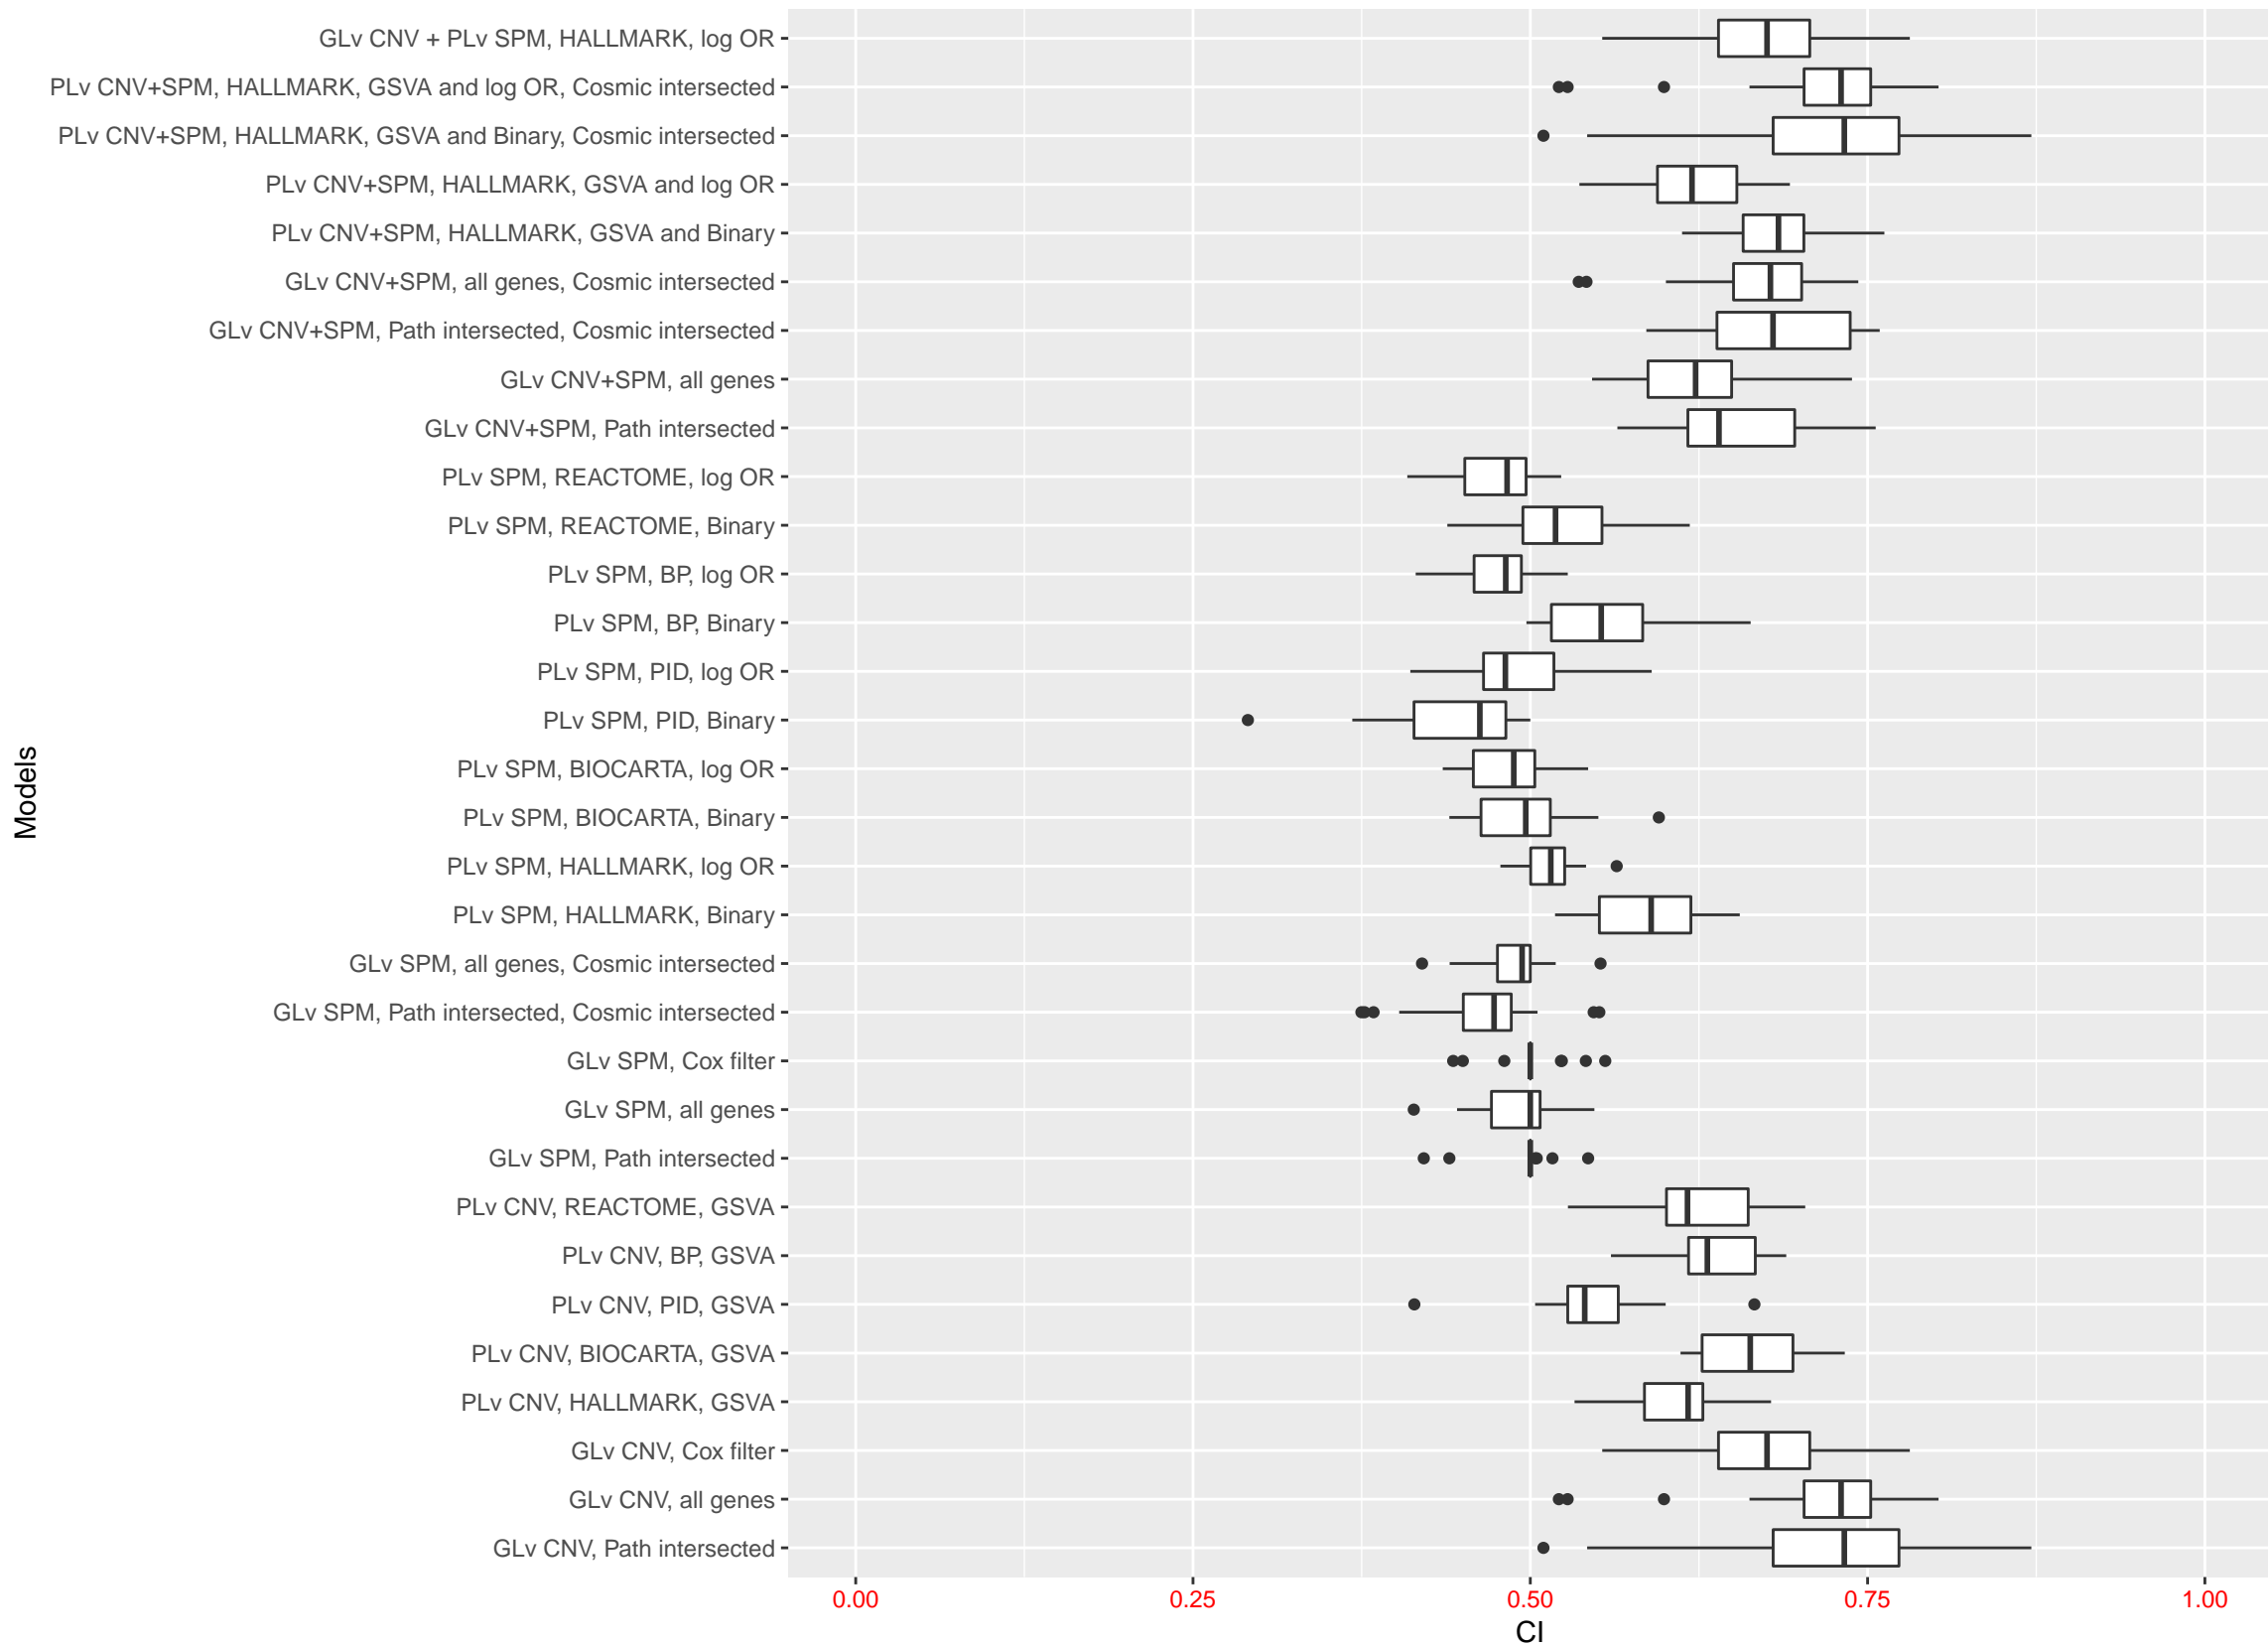

Figure S13 LAML cohort

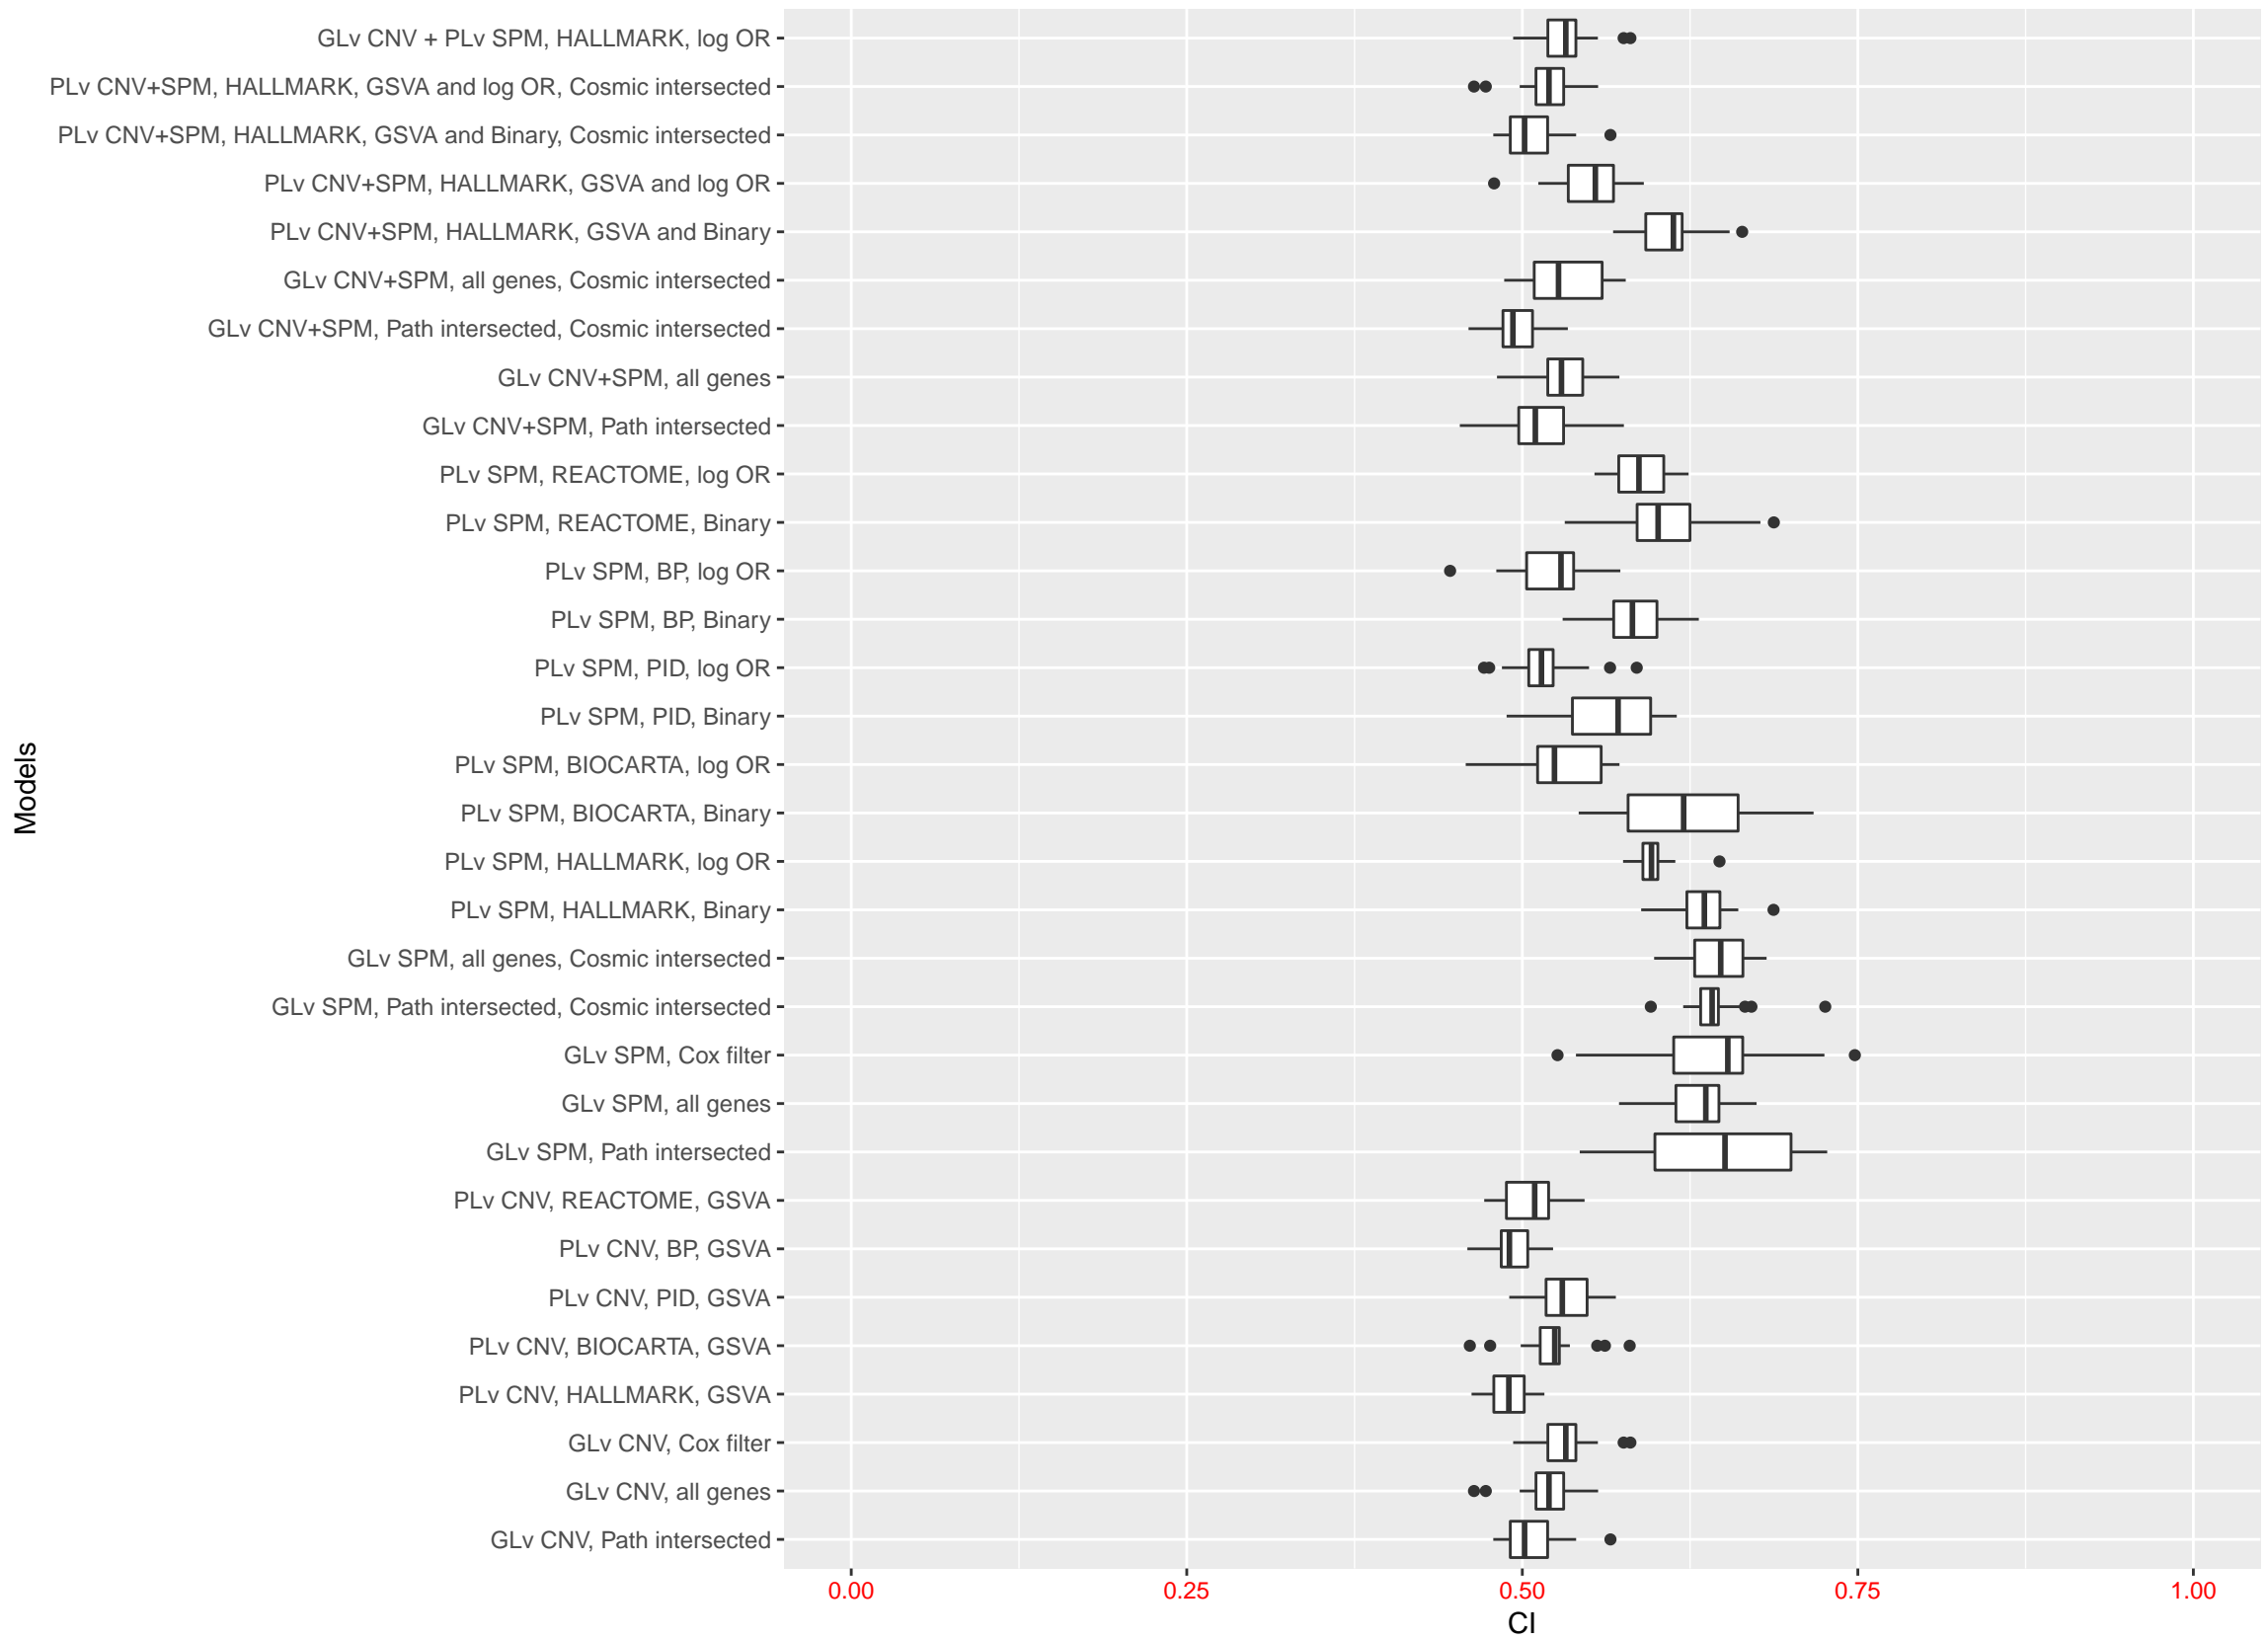

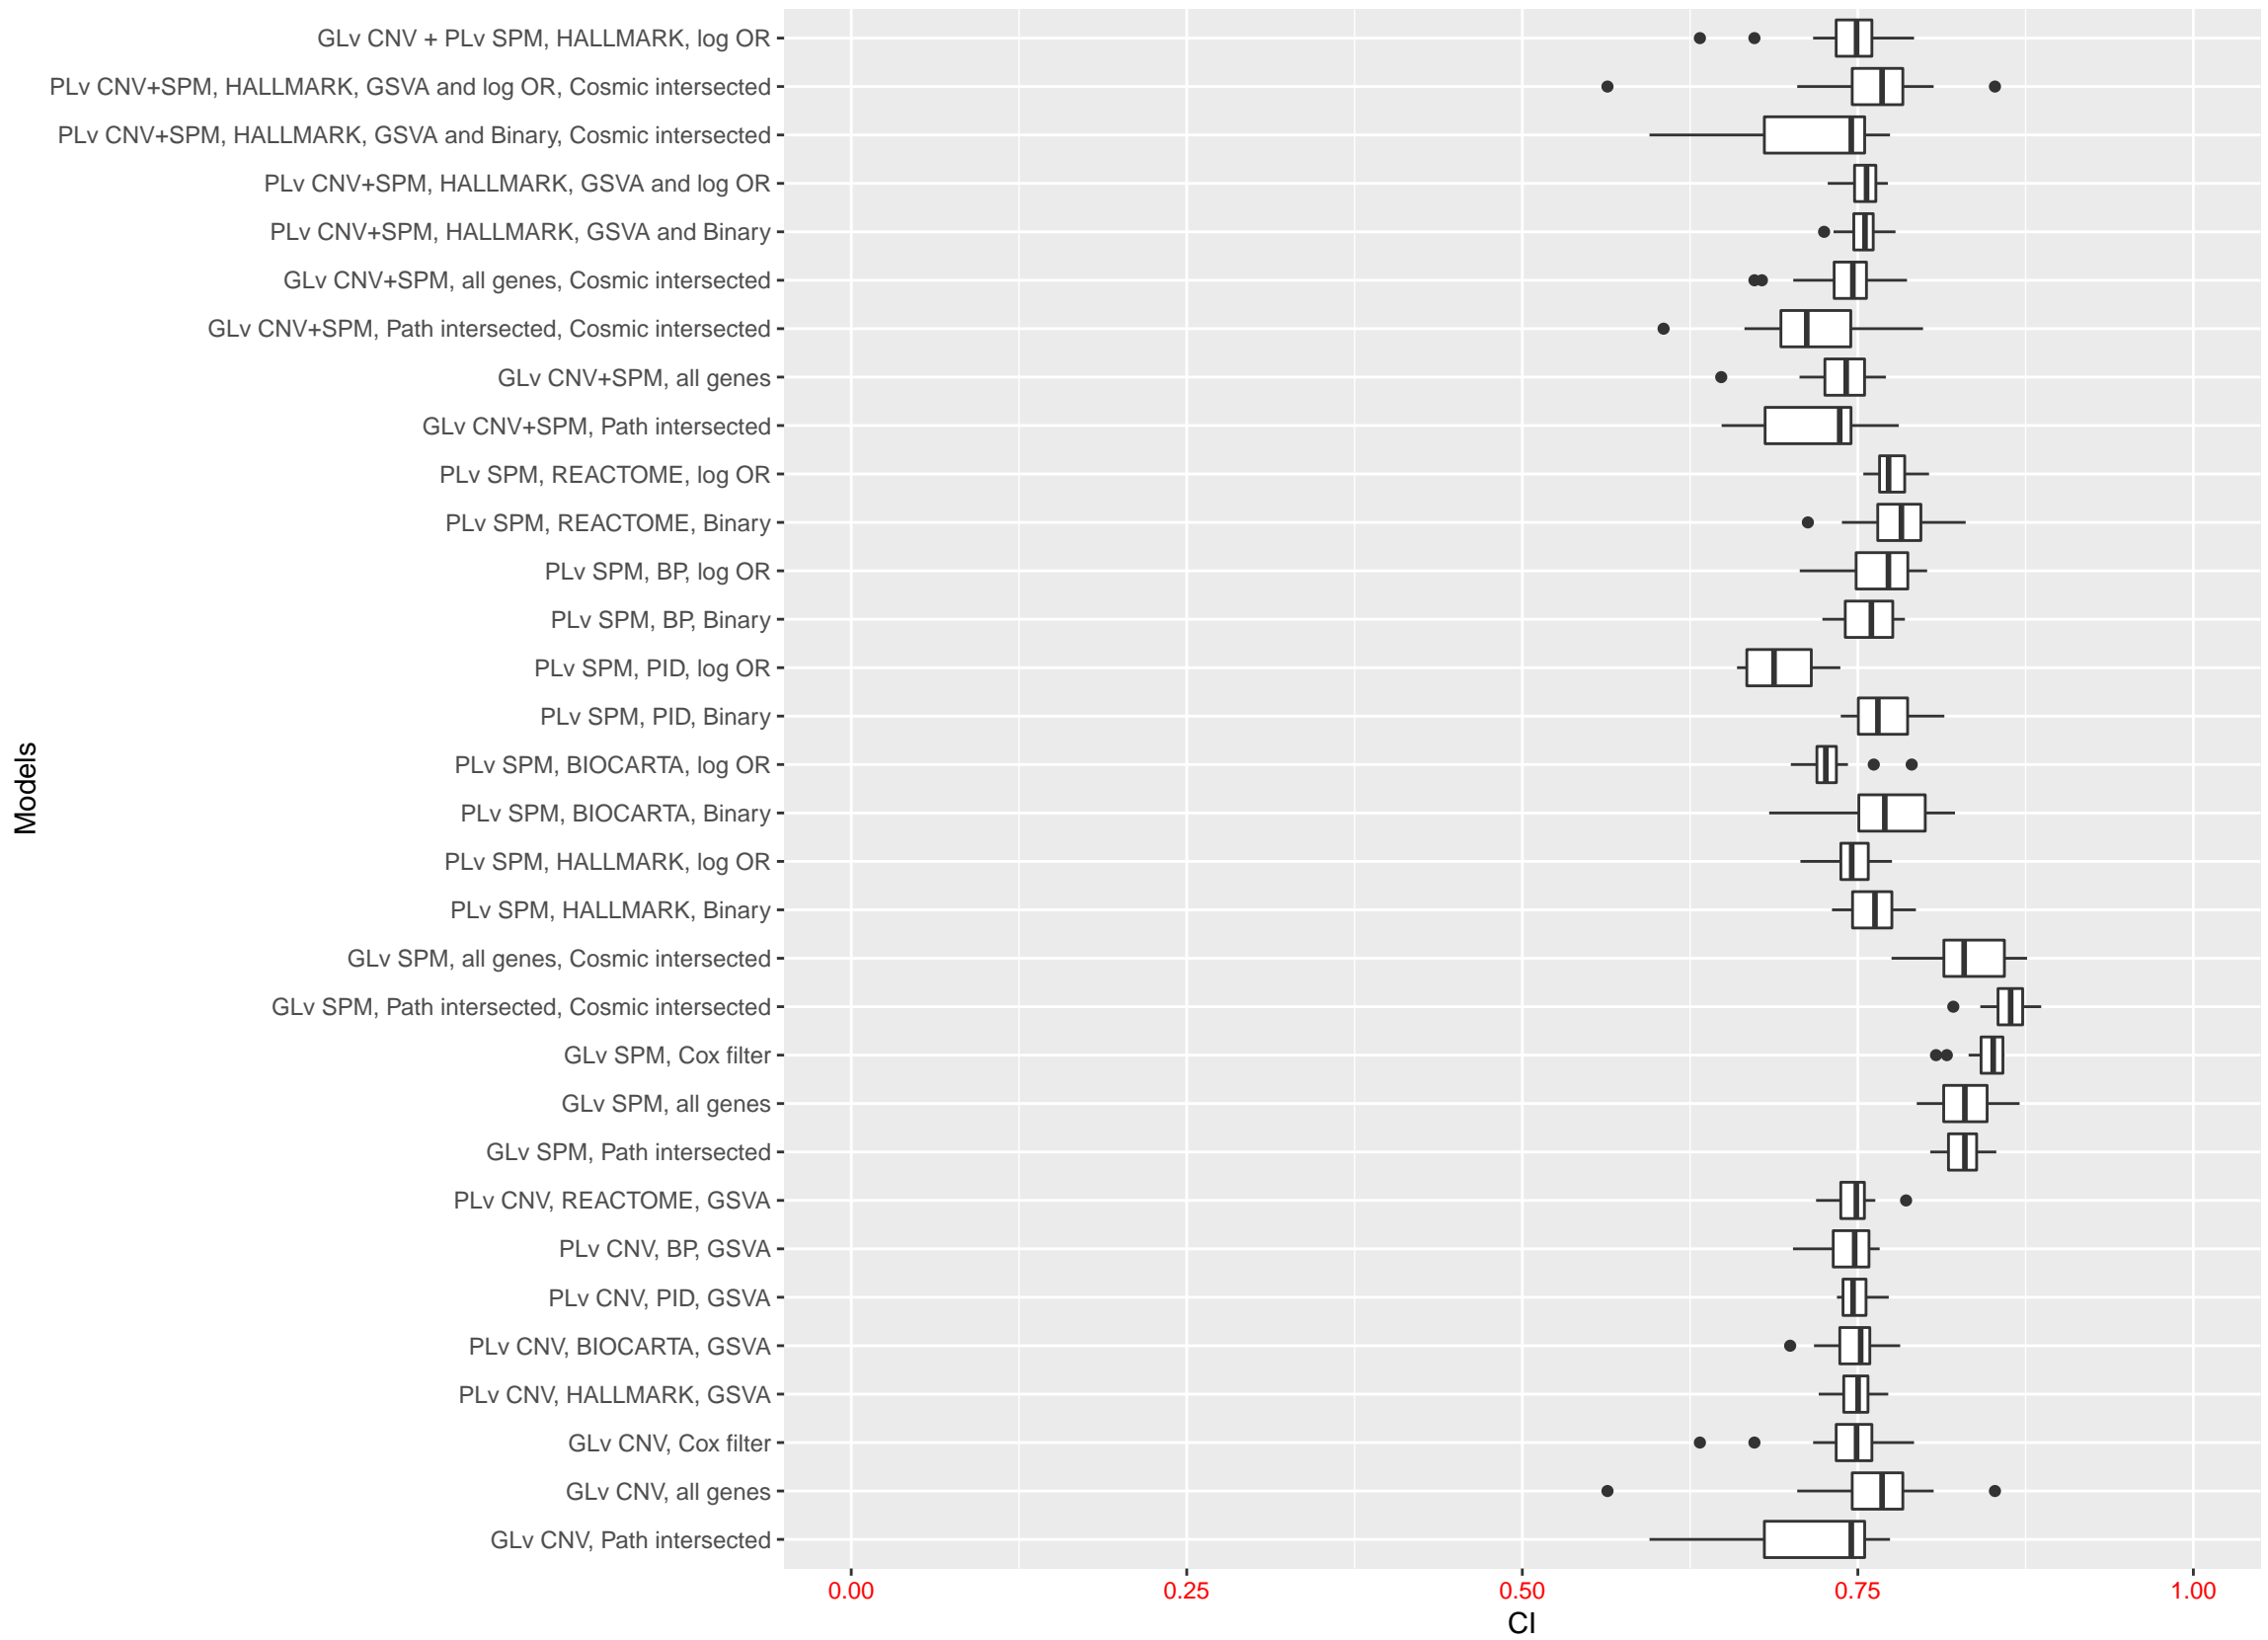

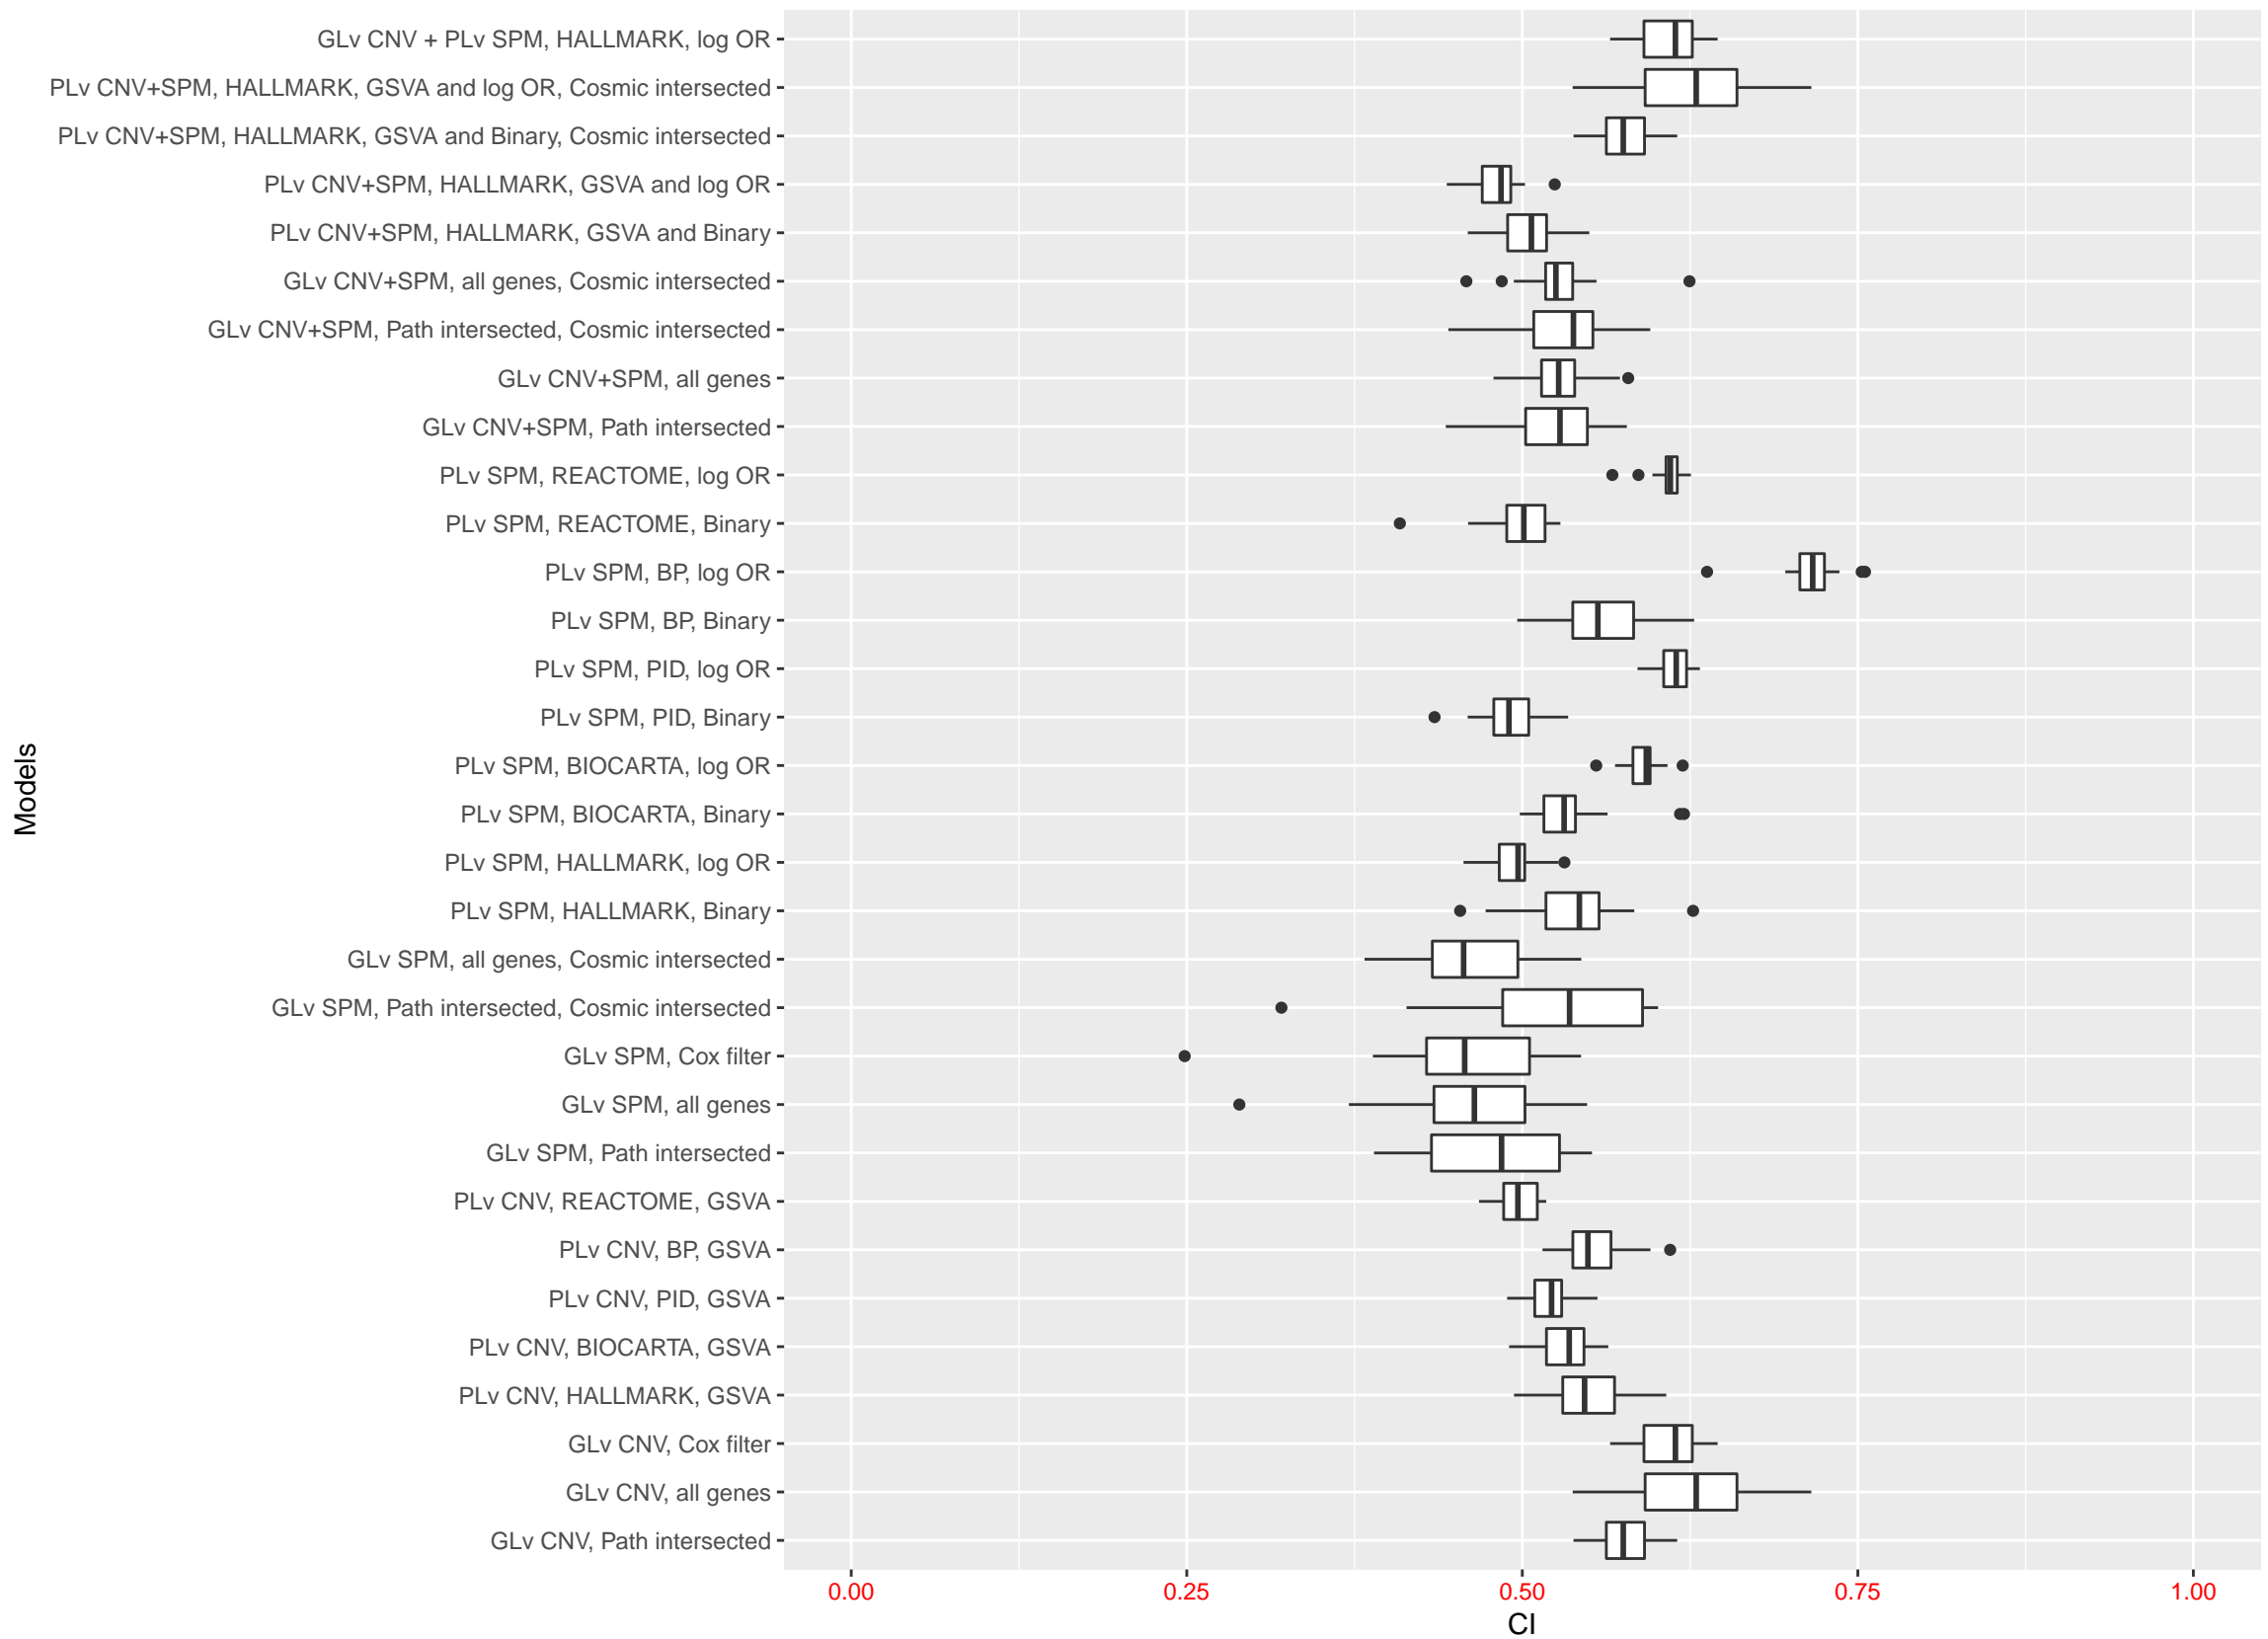

Figure S16 LUAD cohort

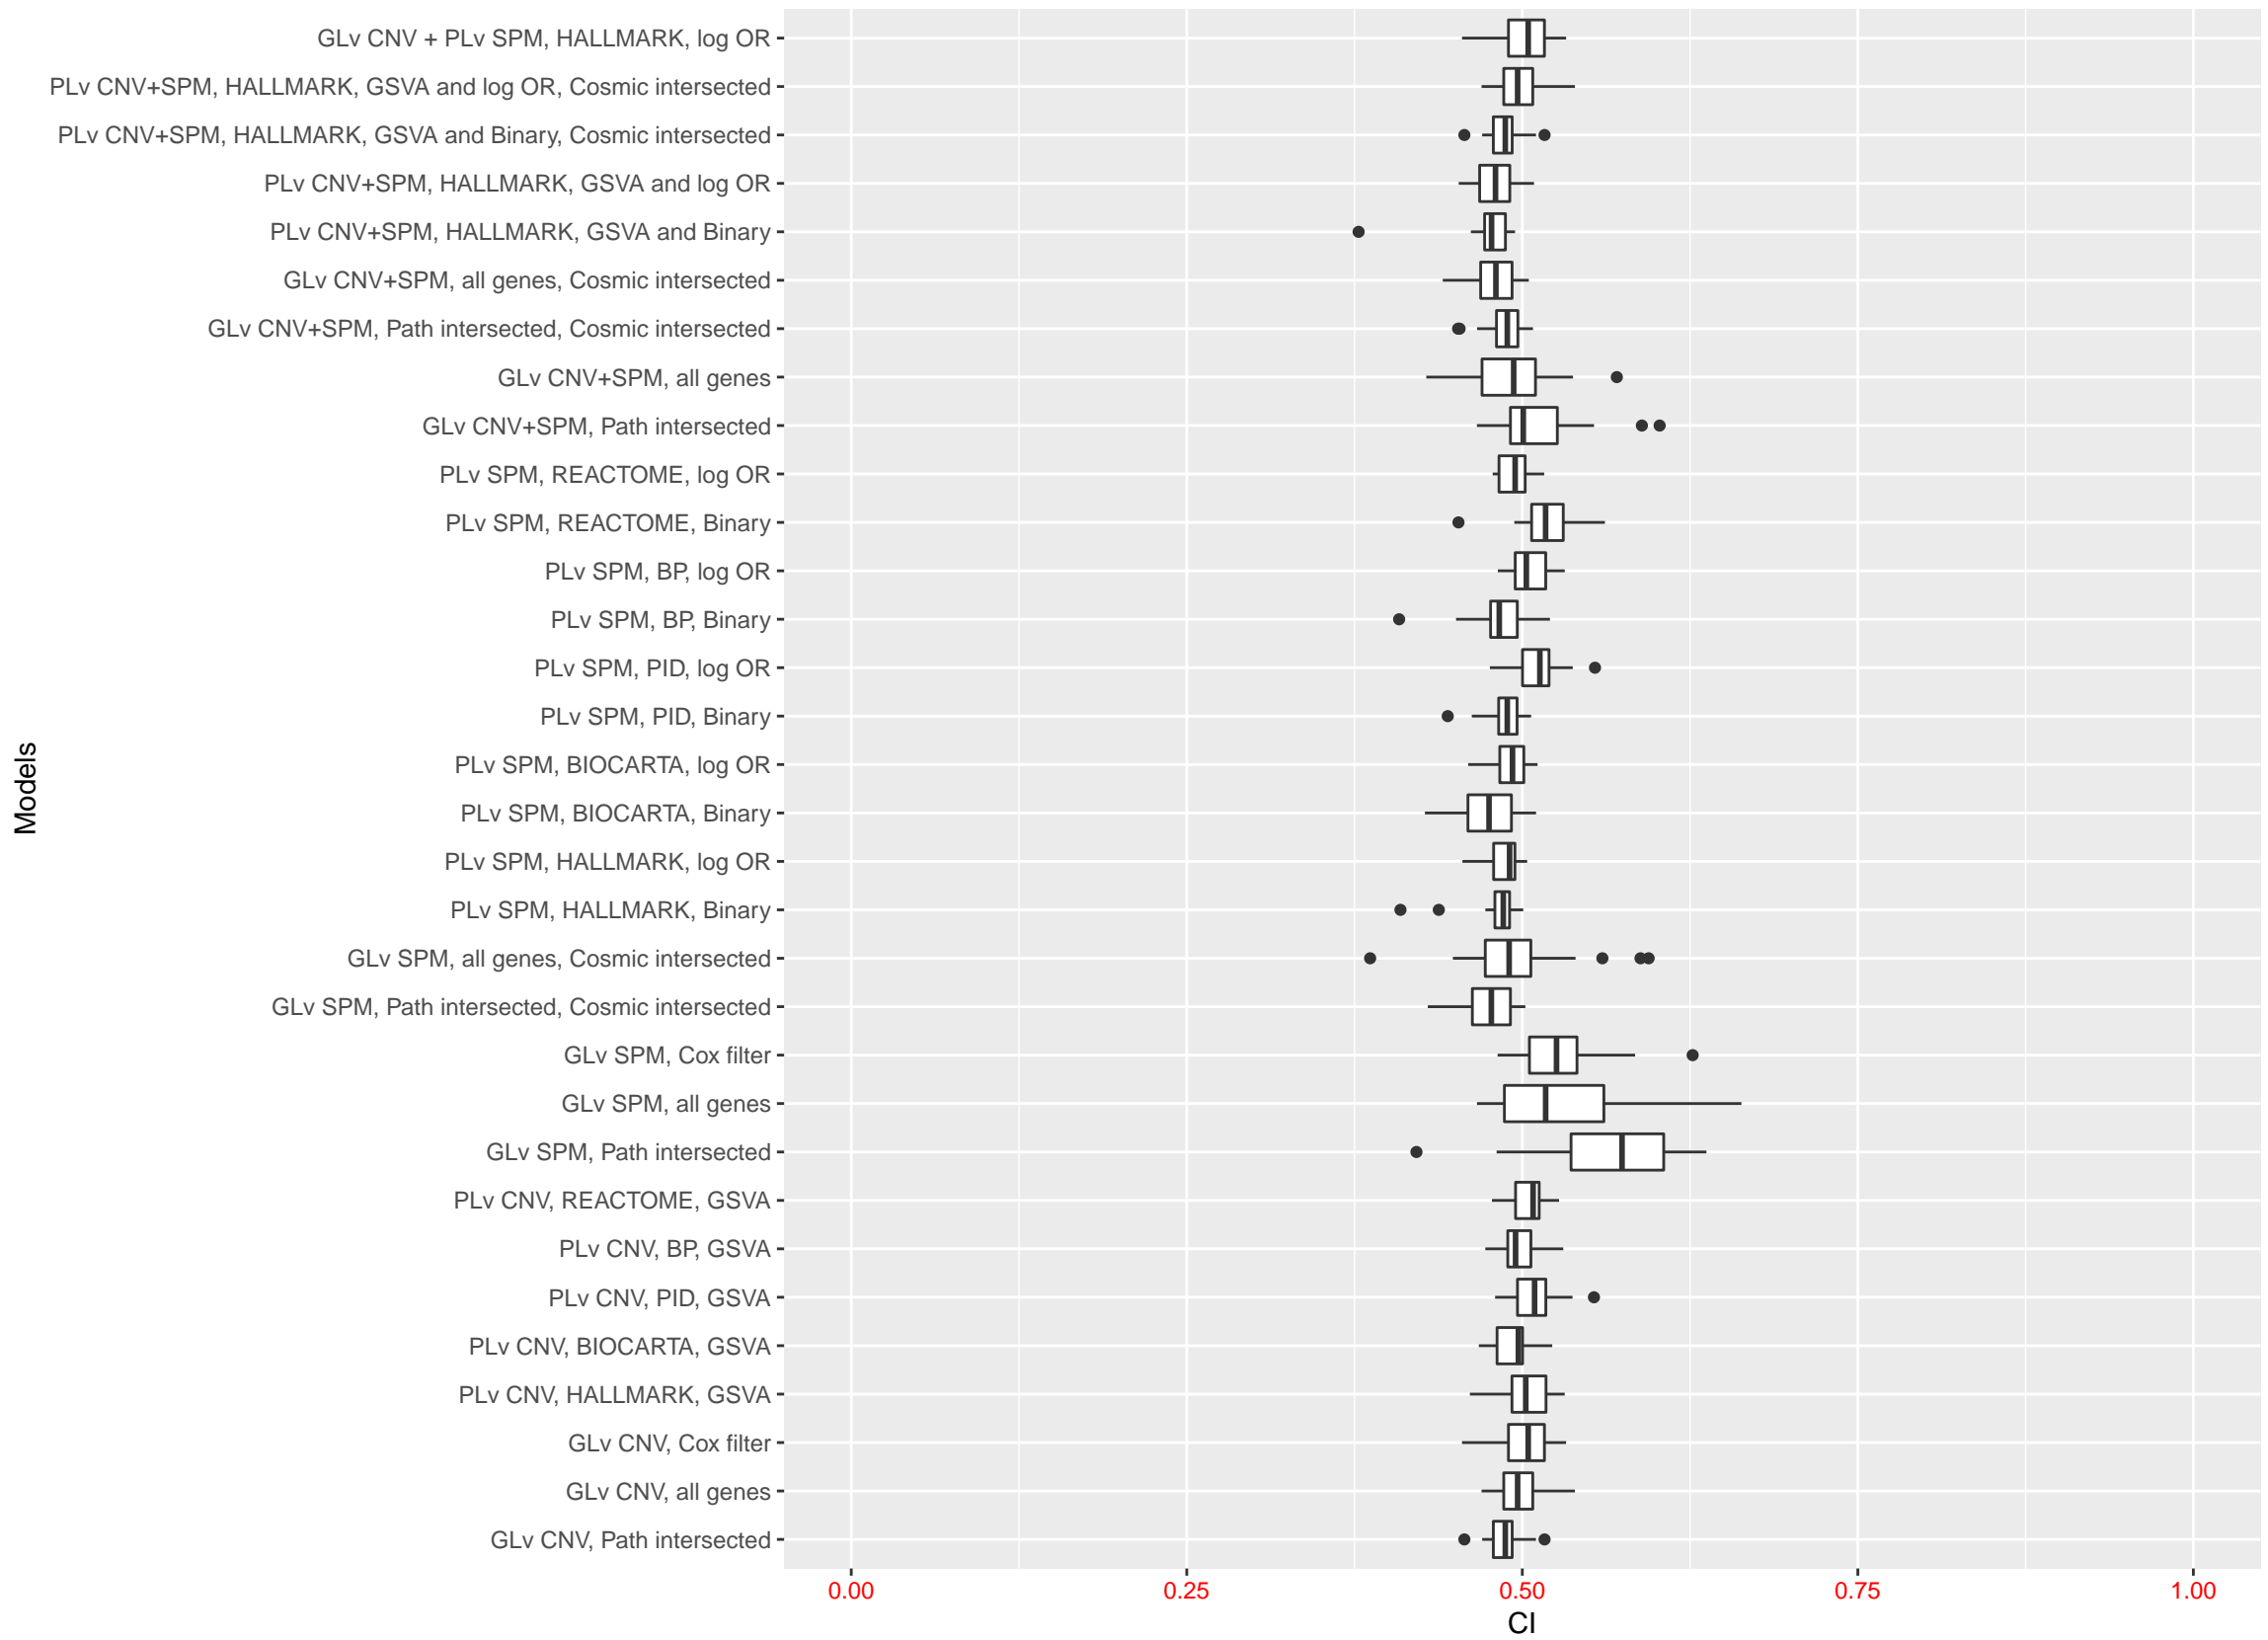

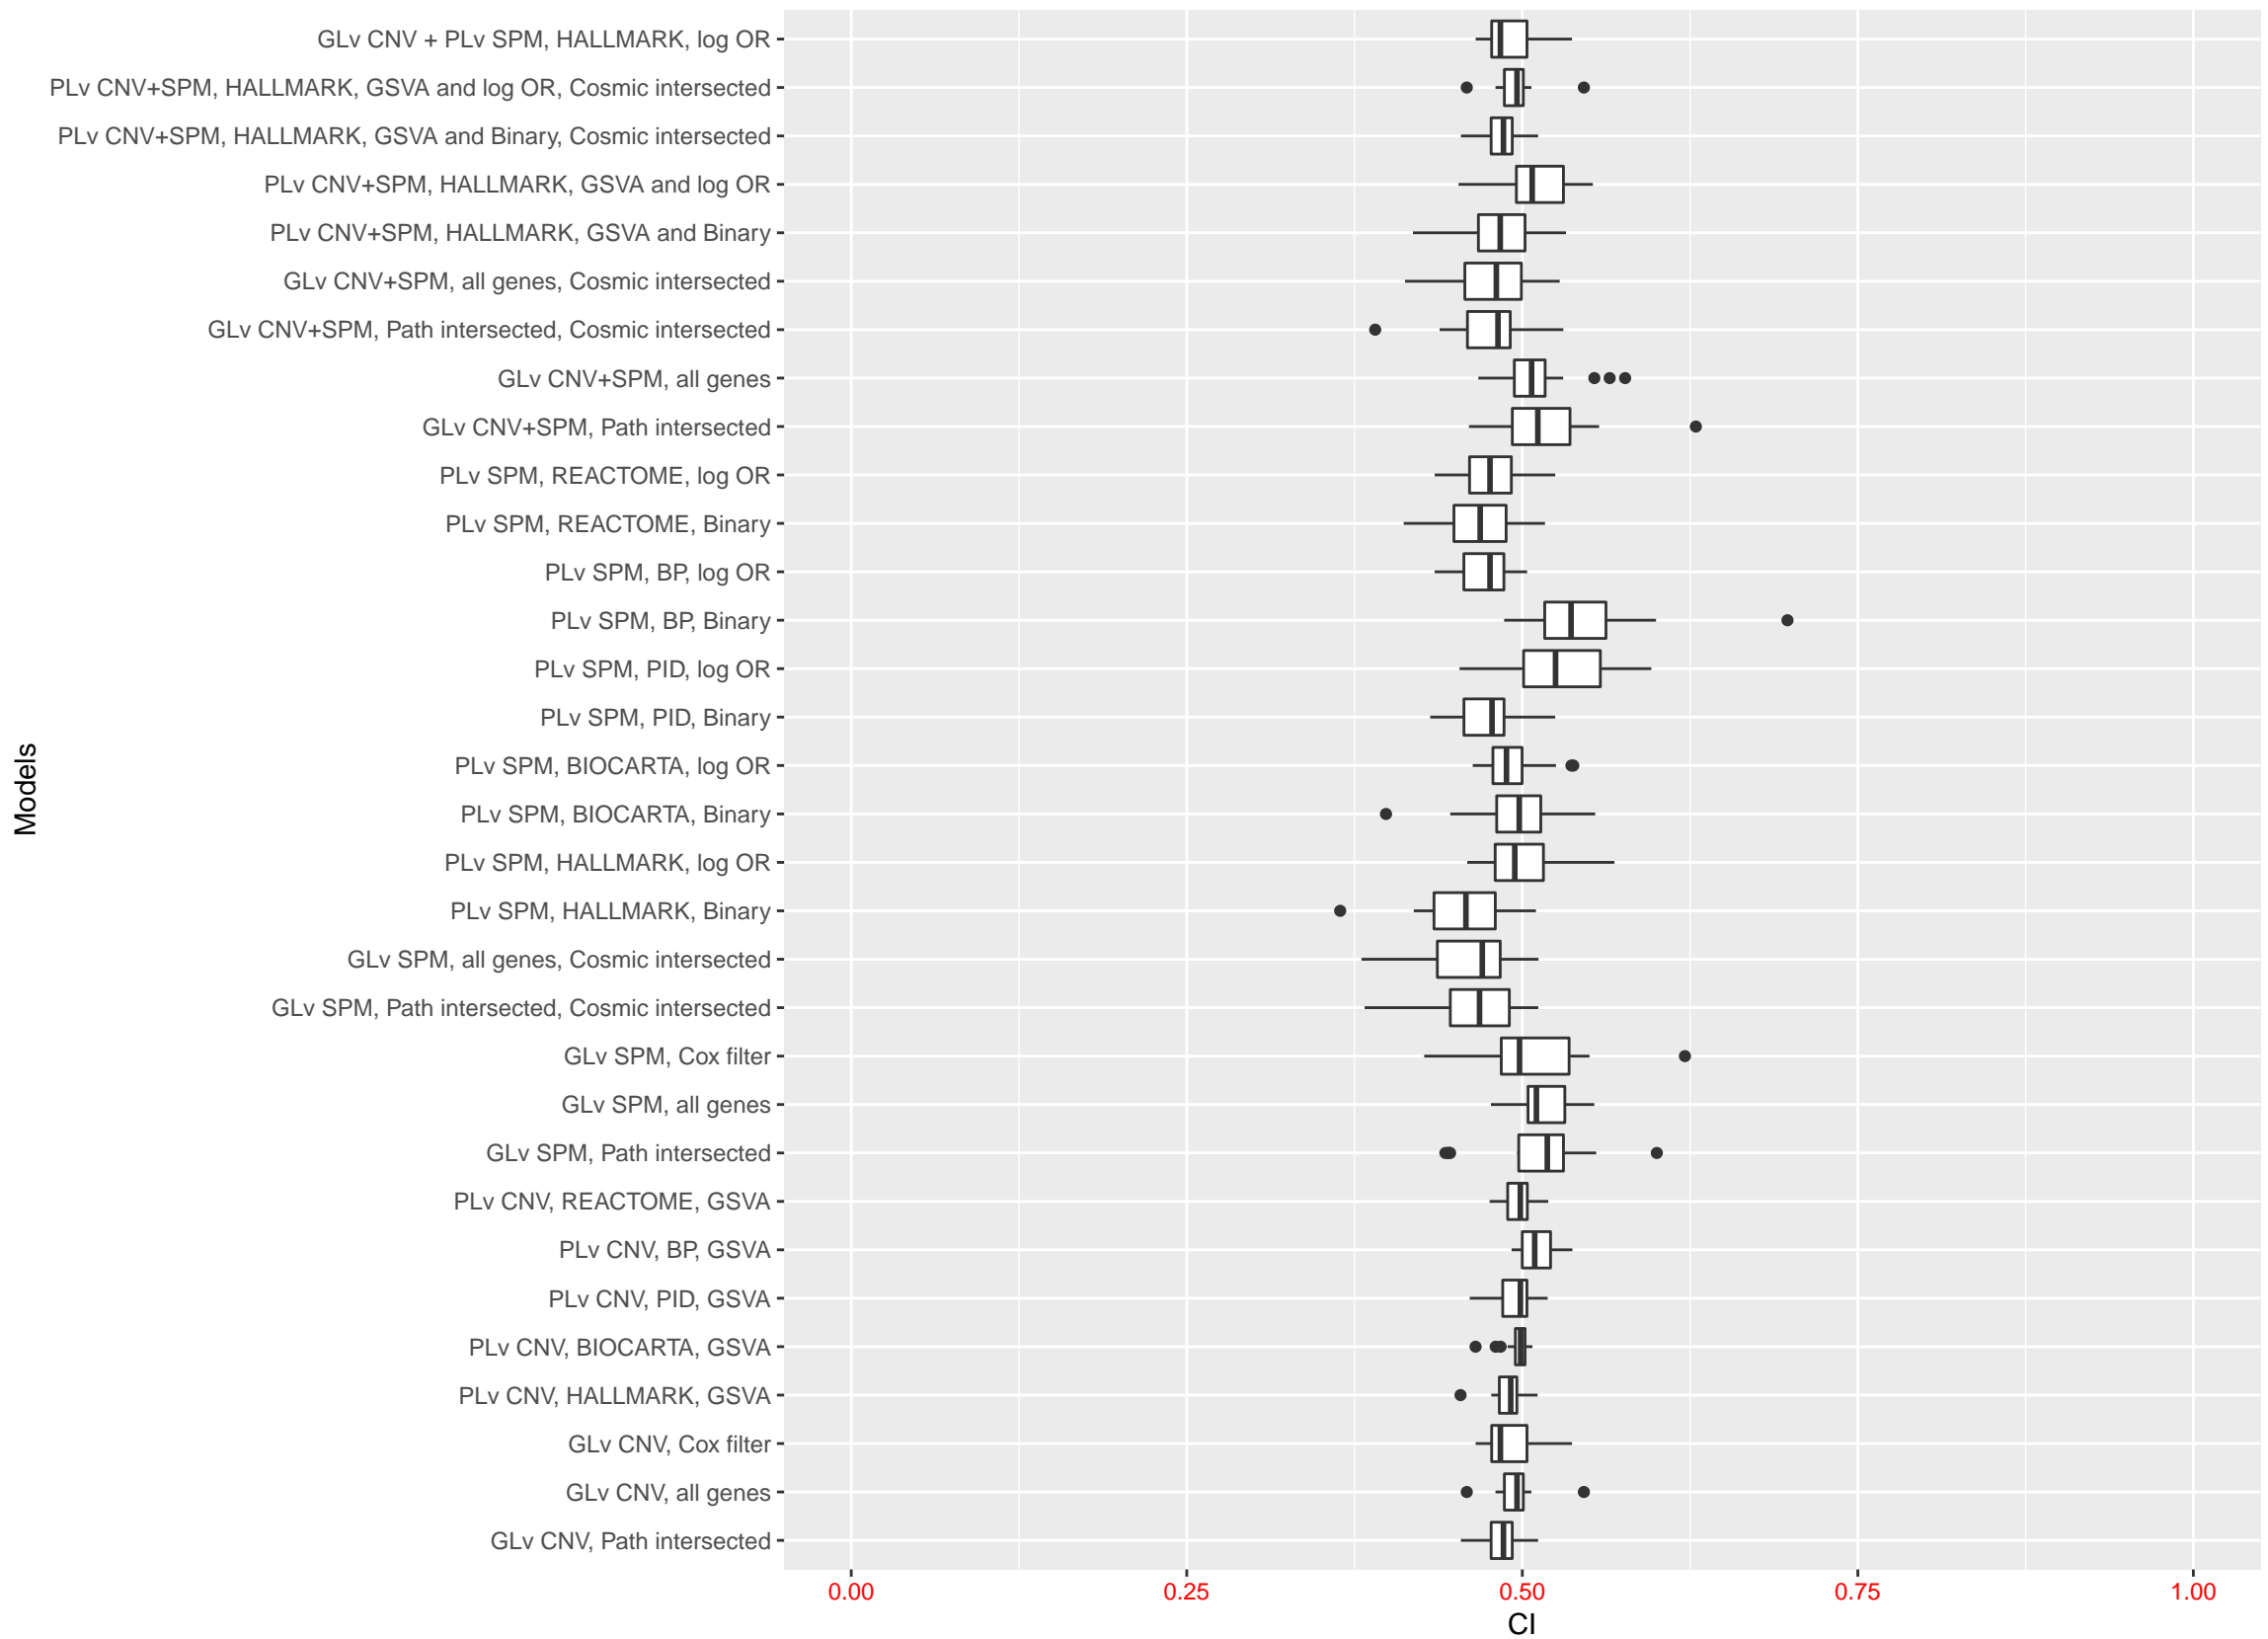

Figure S18 MESO cohort

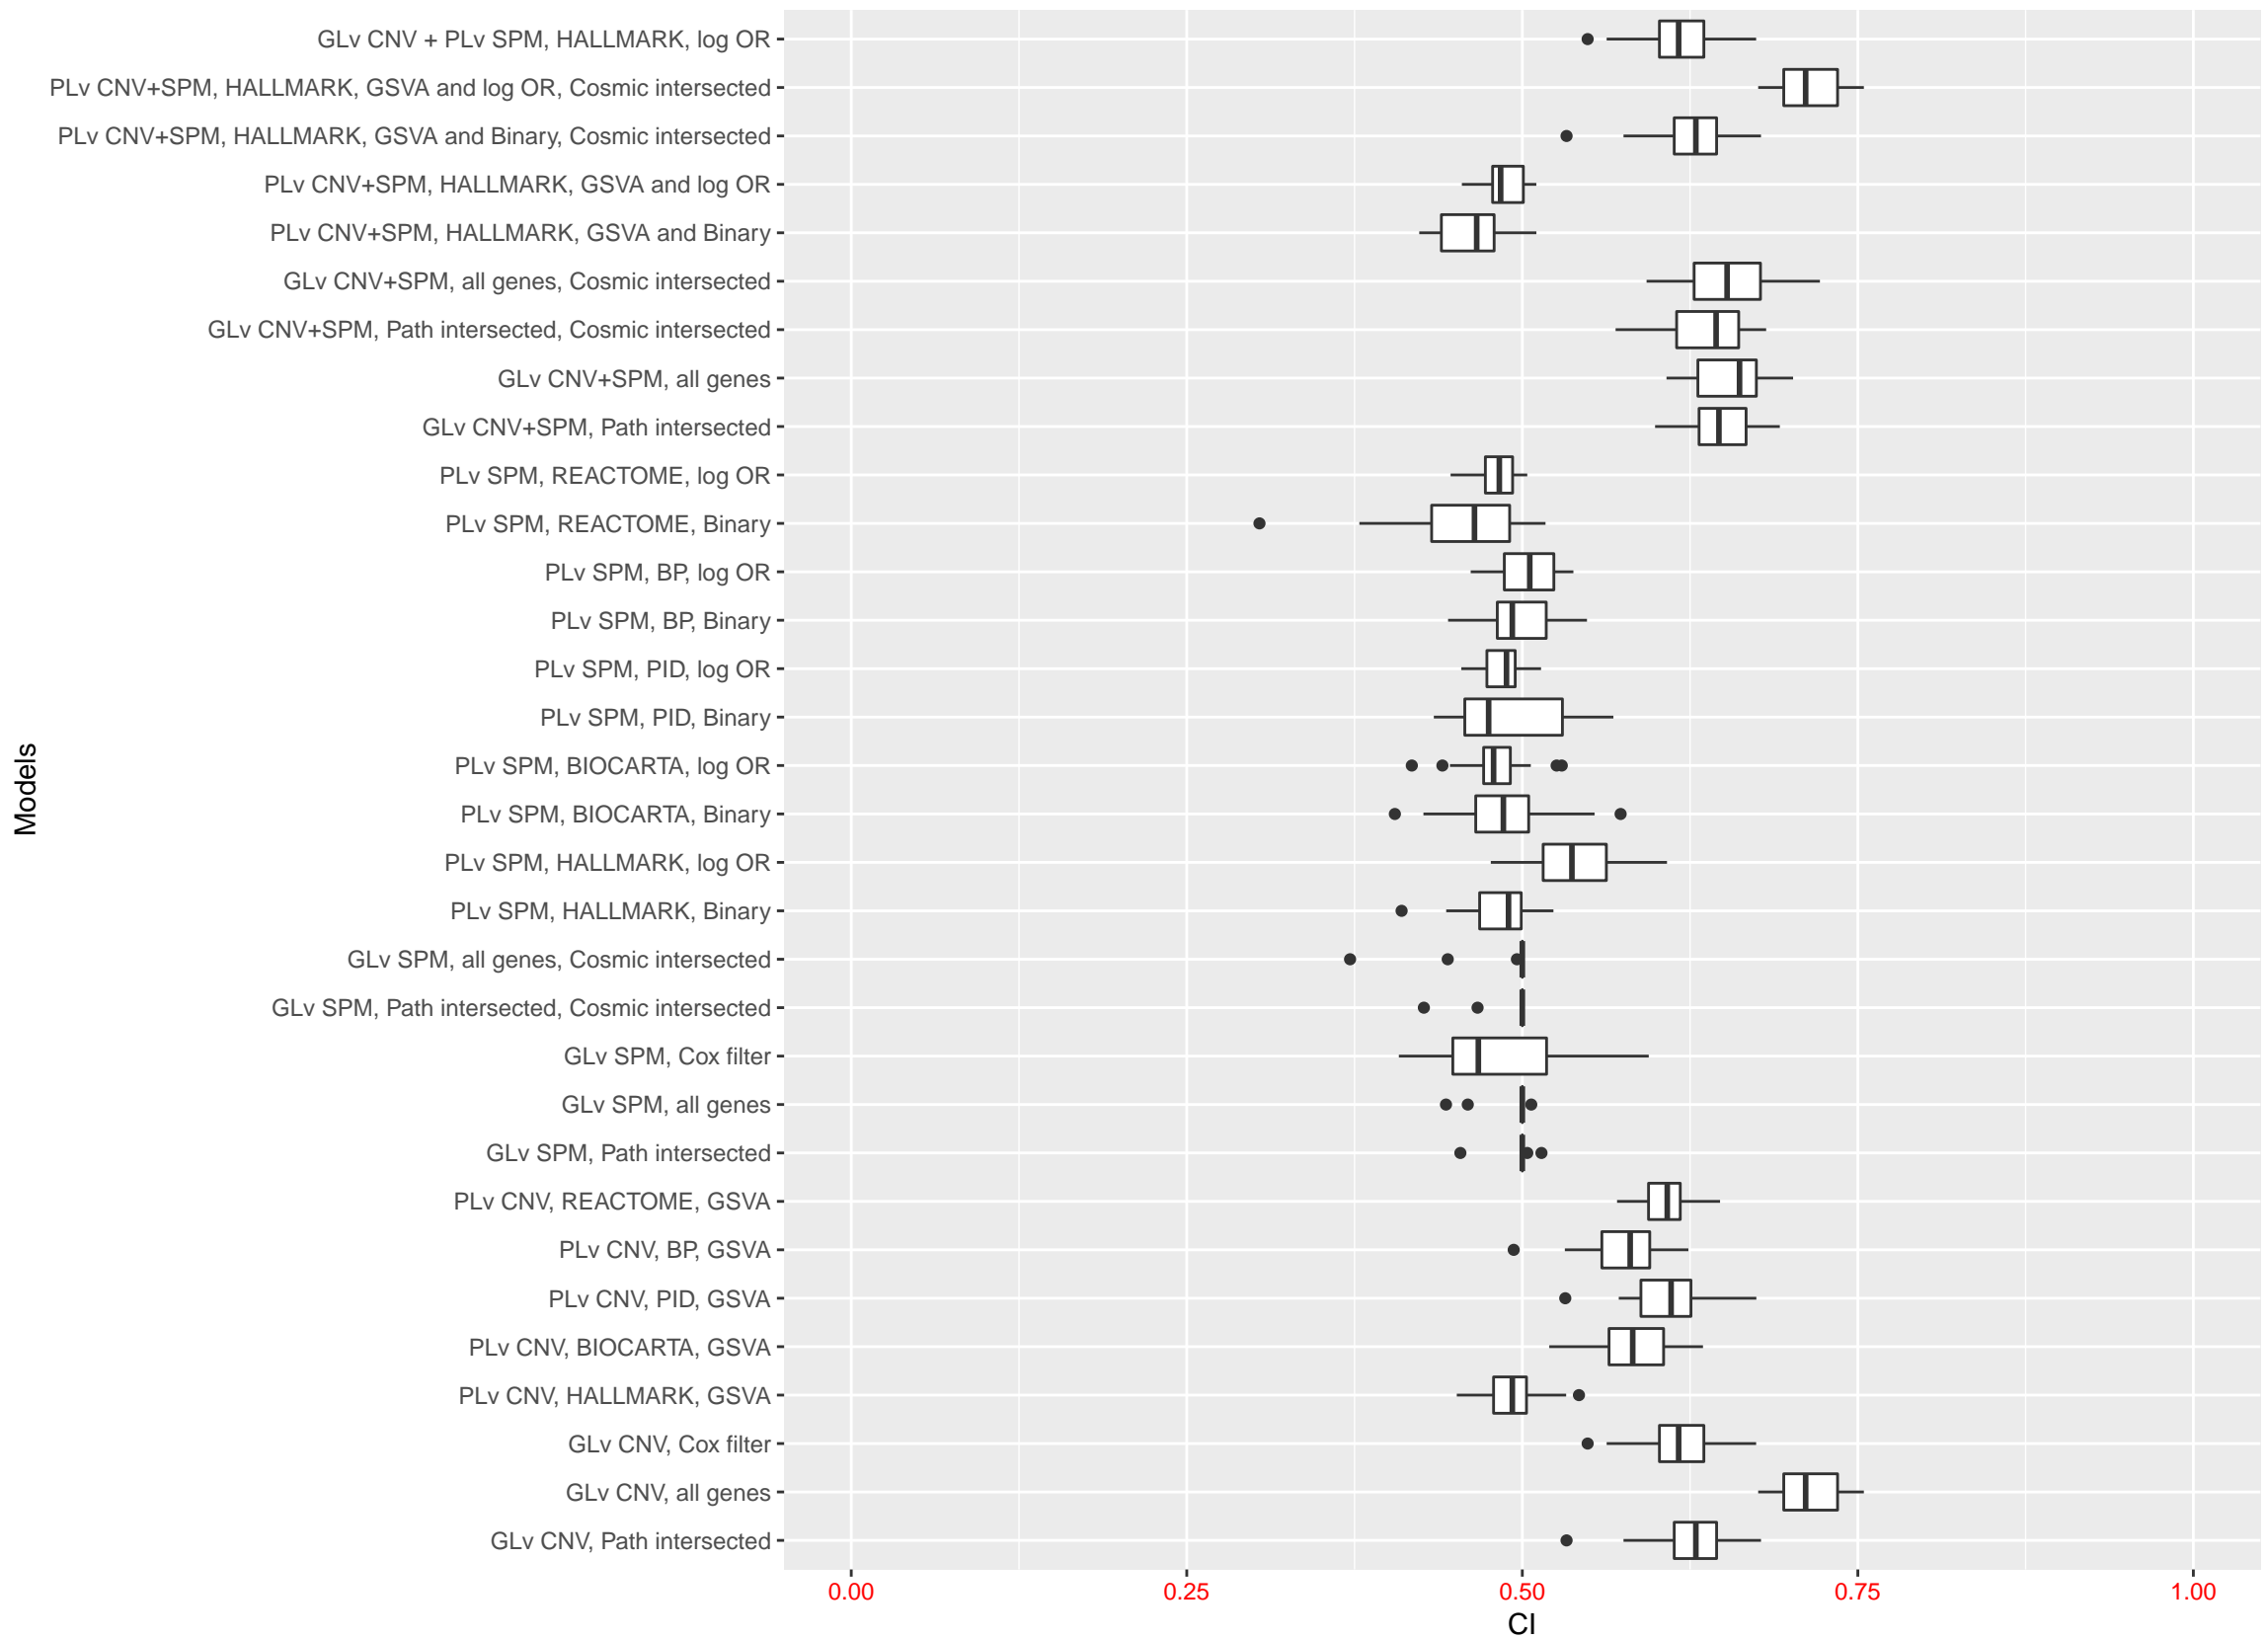

Figure S19 OV cohort

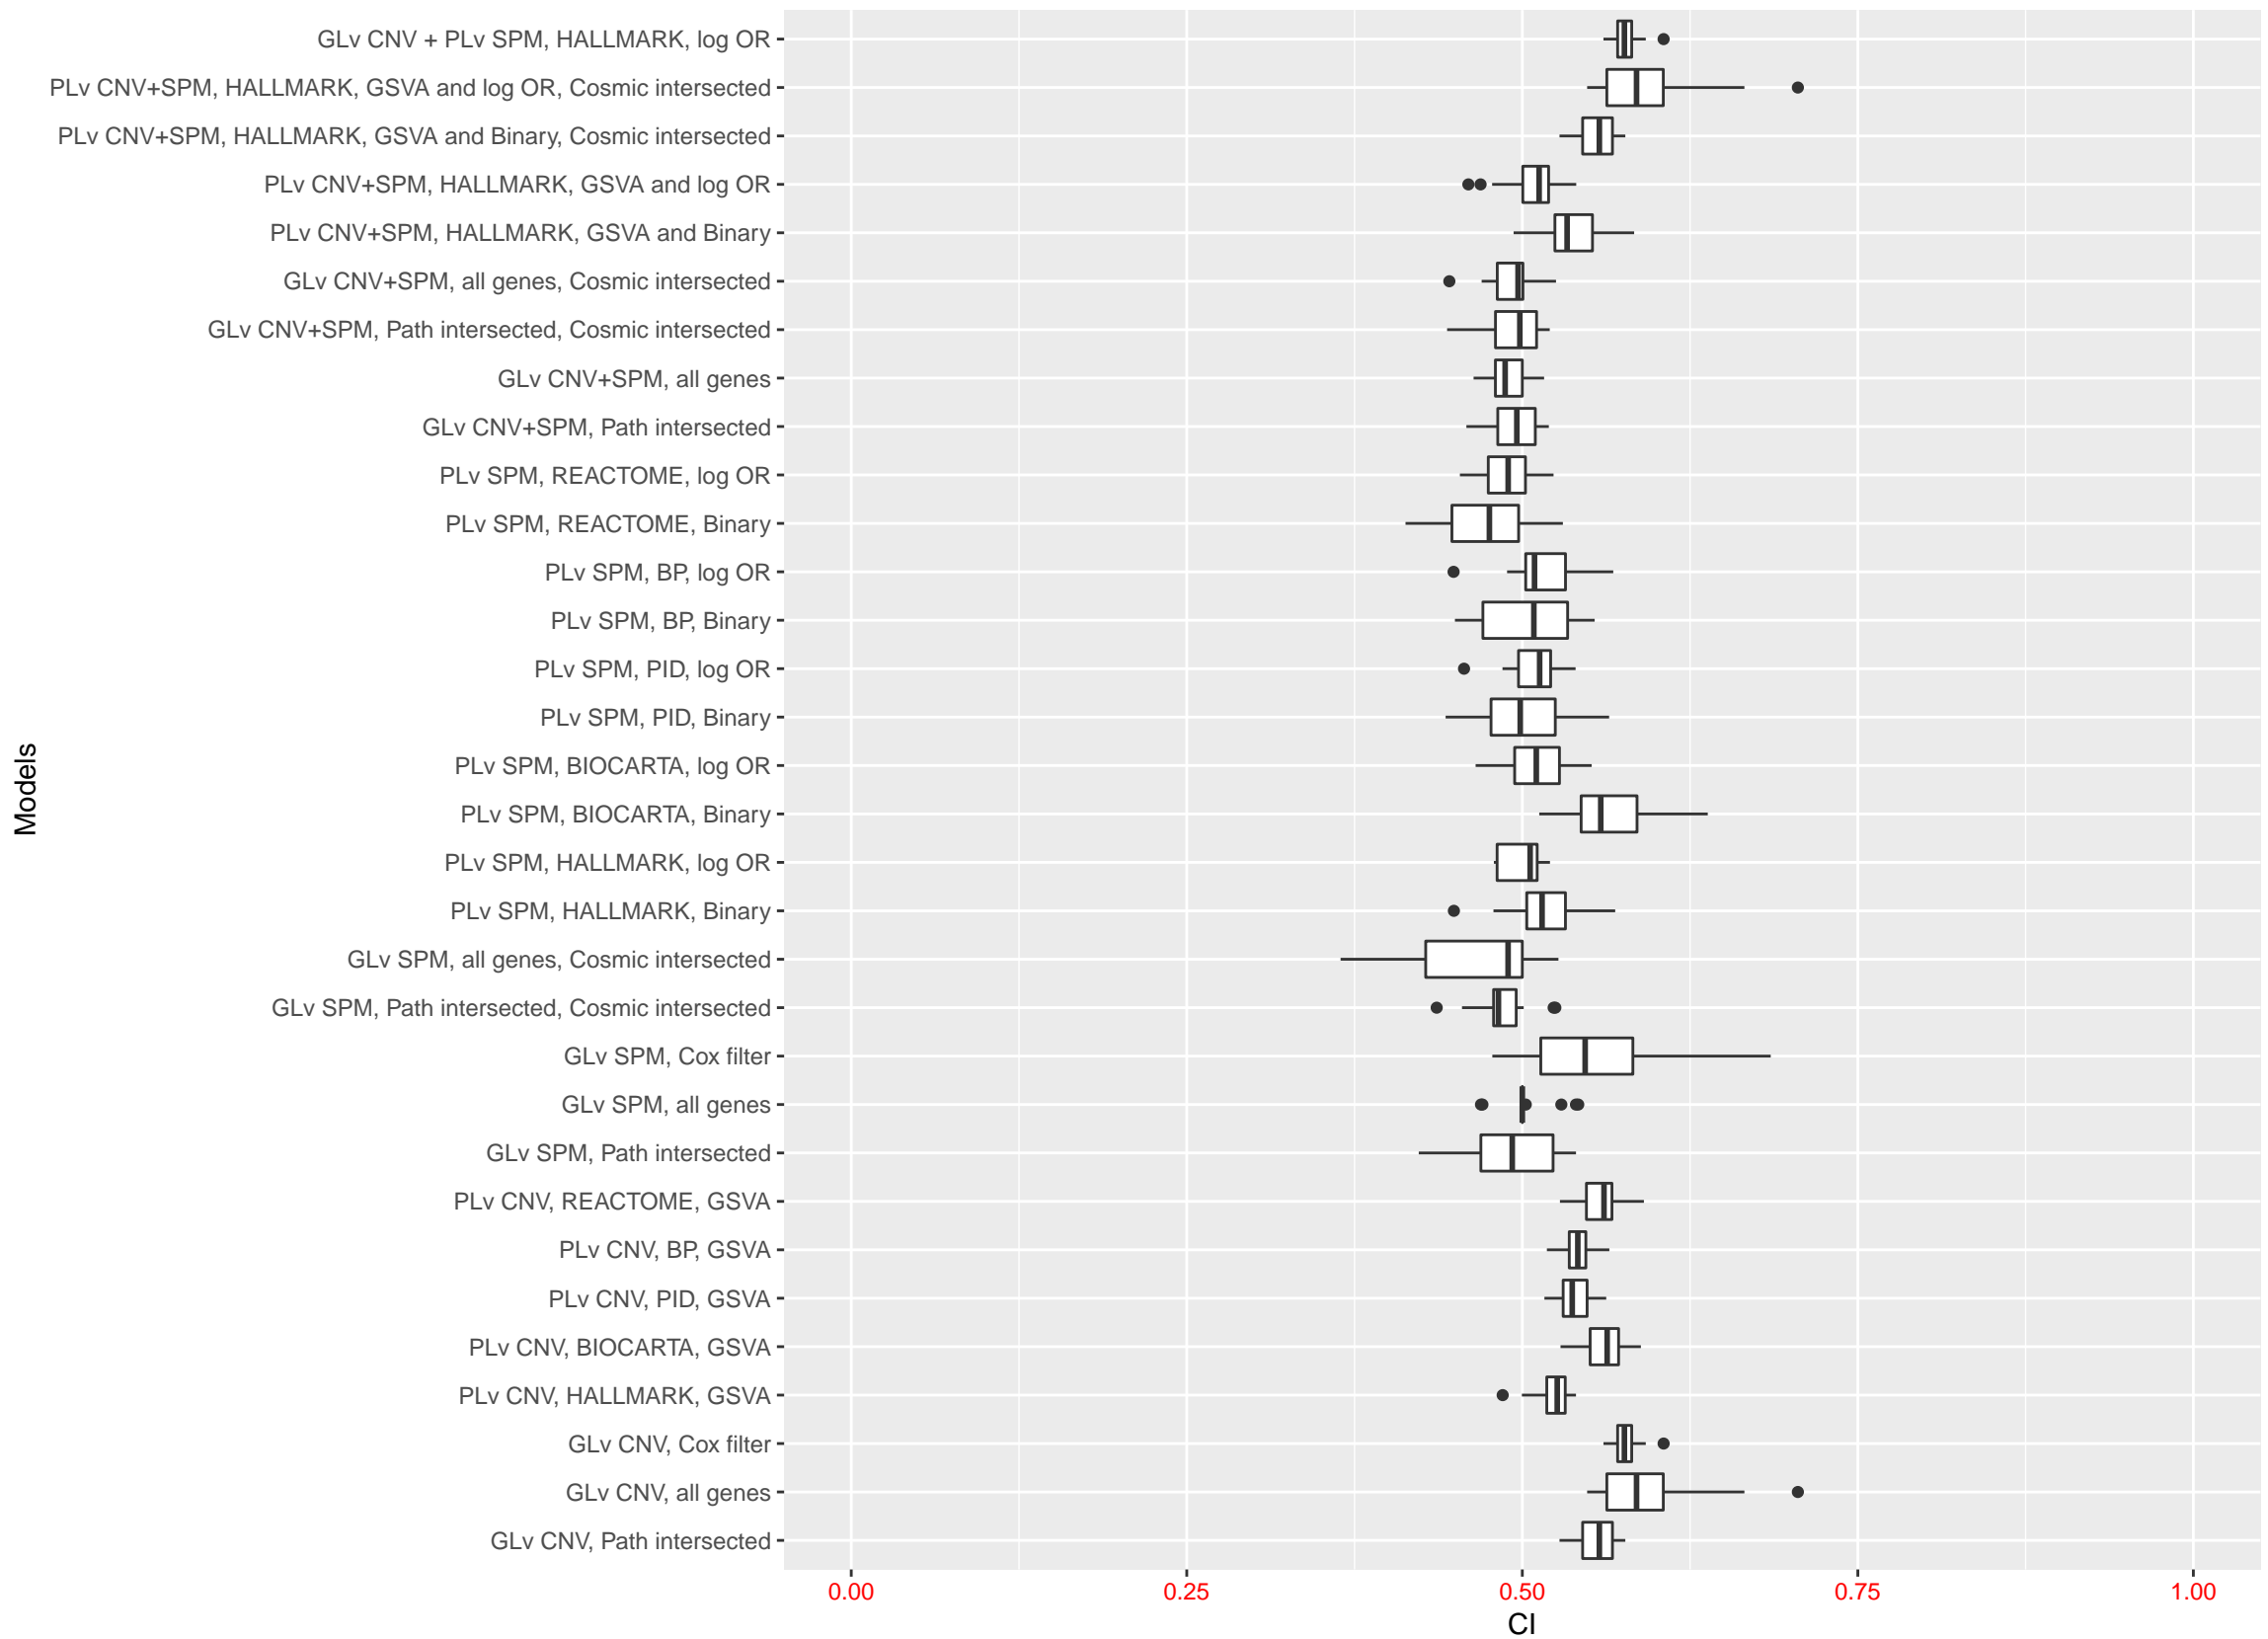

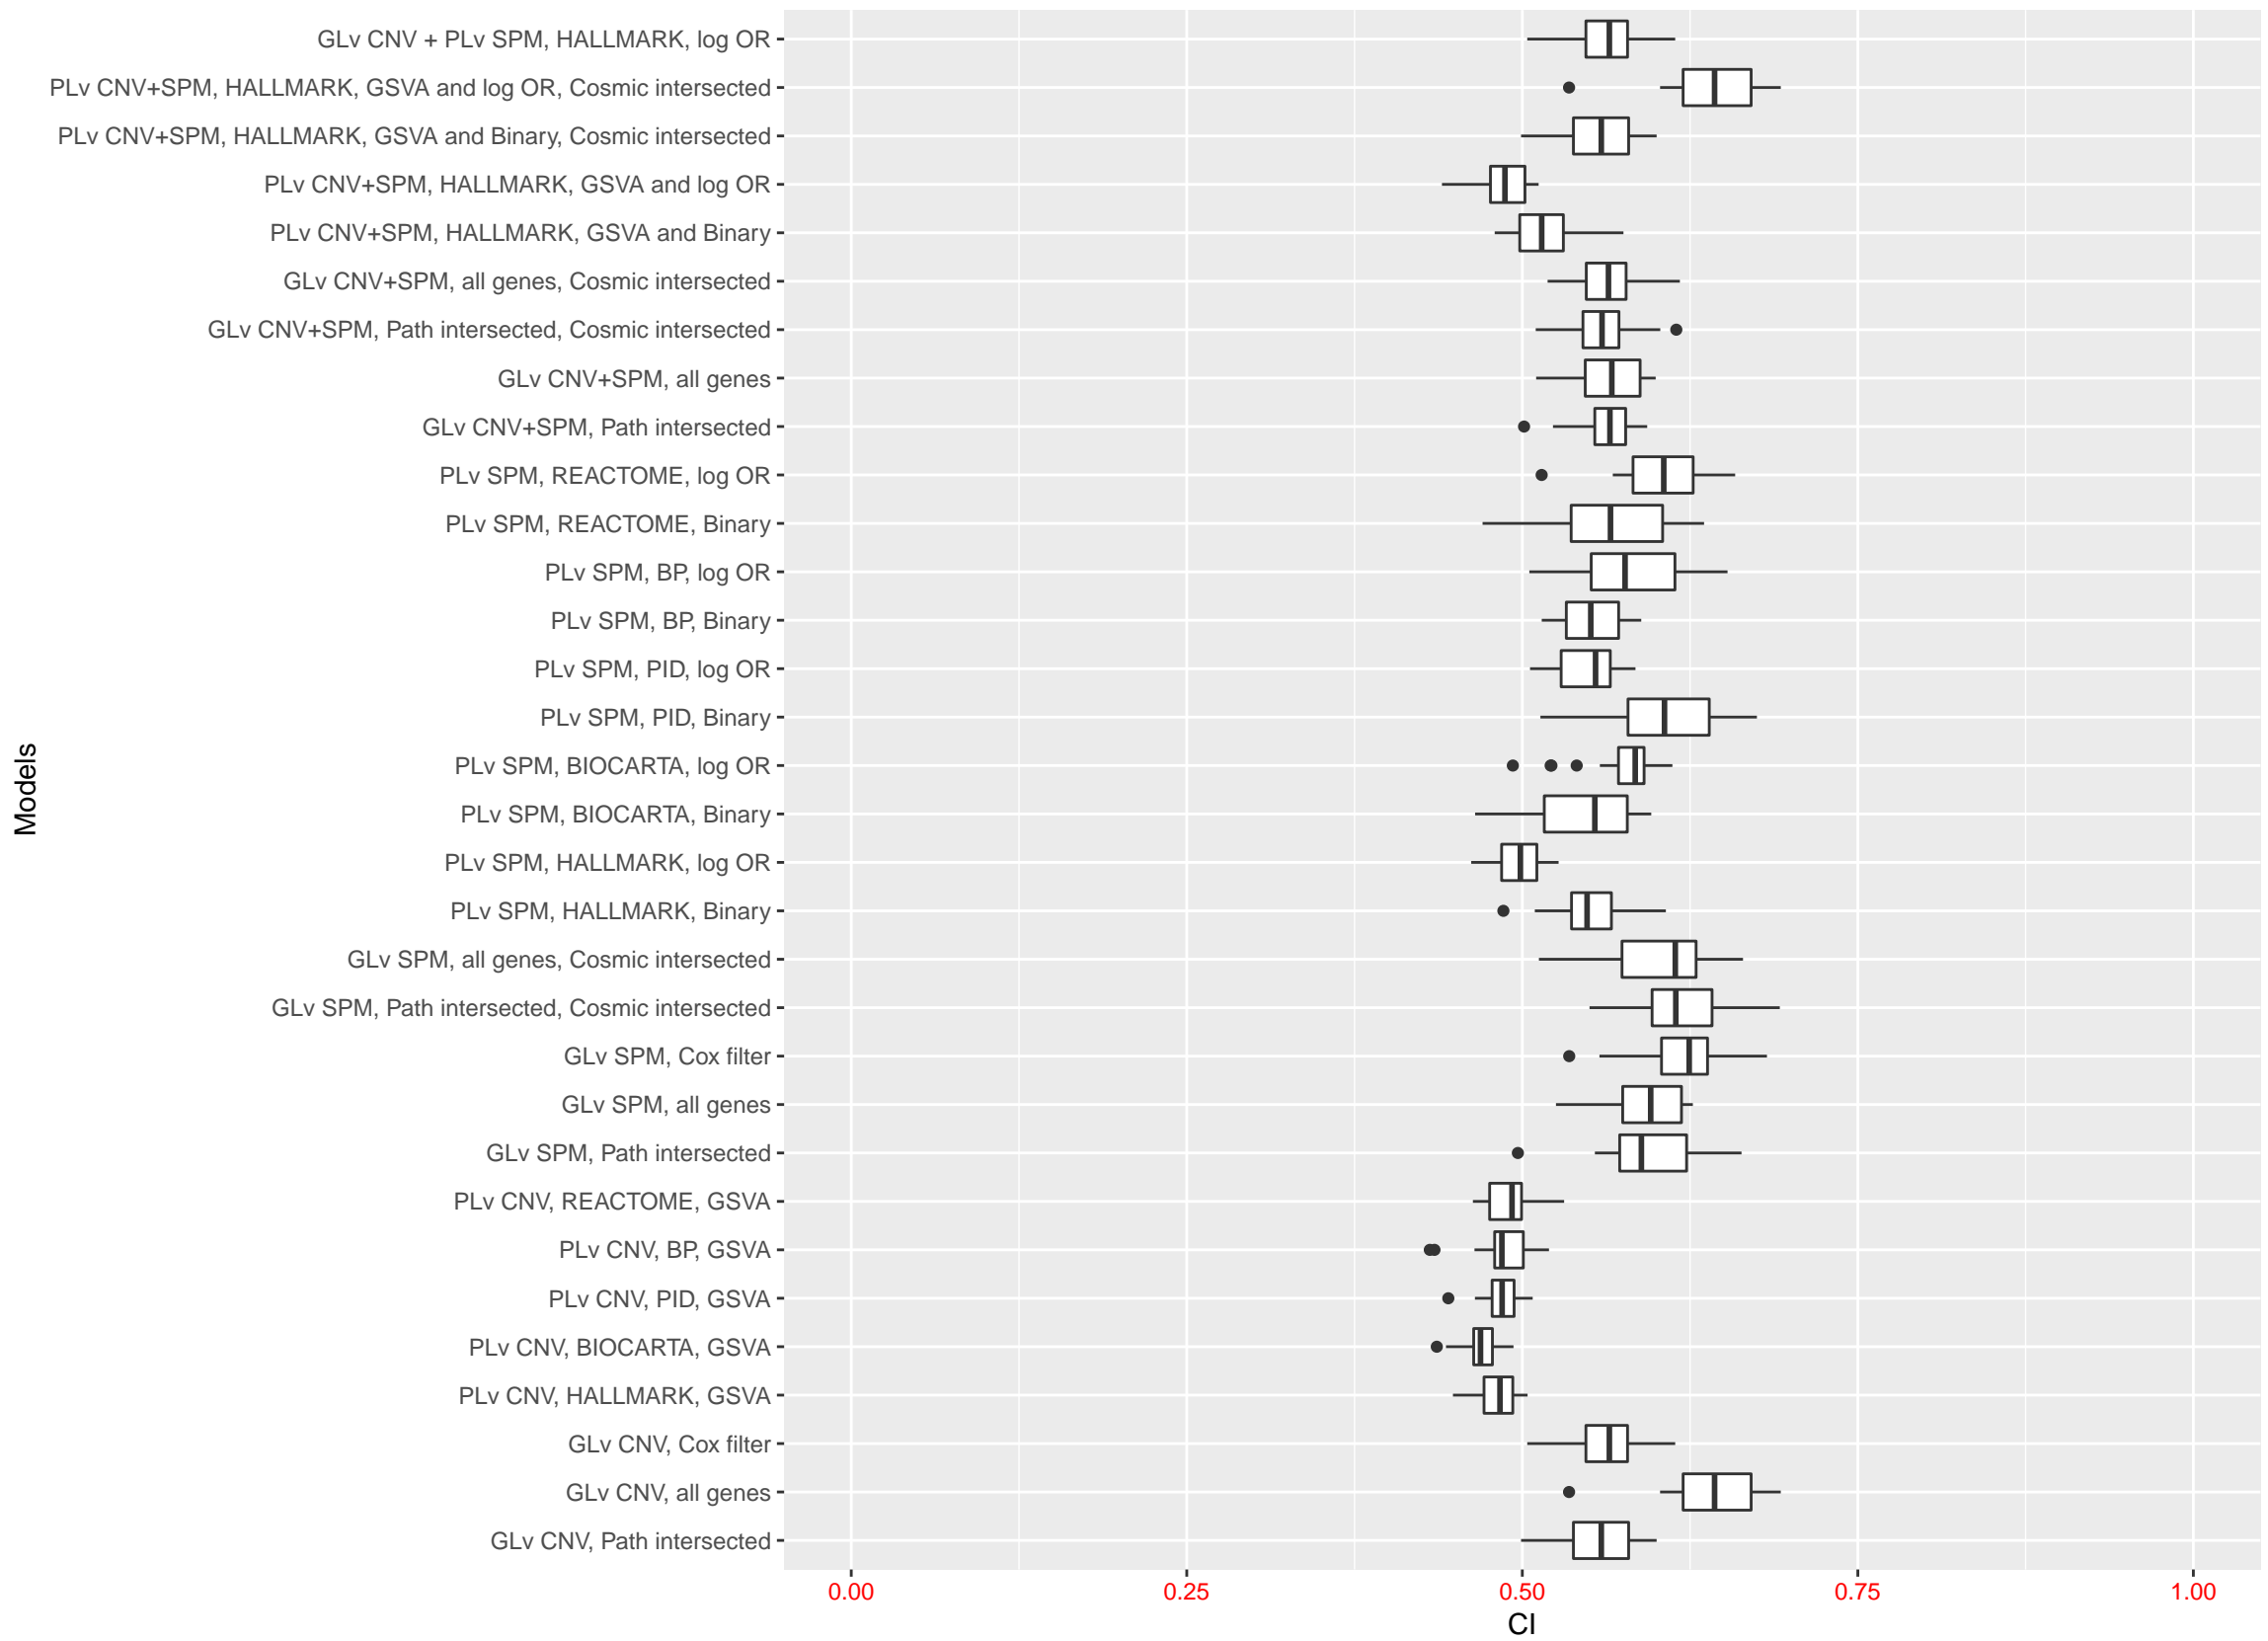

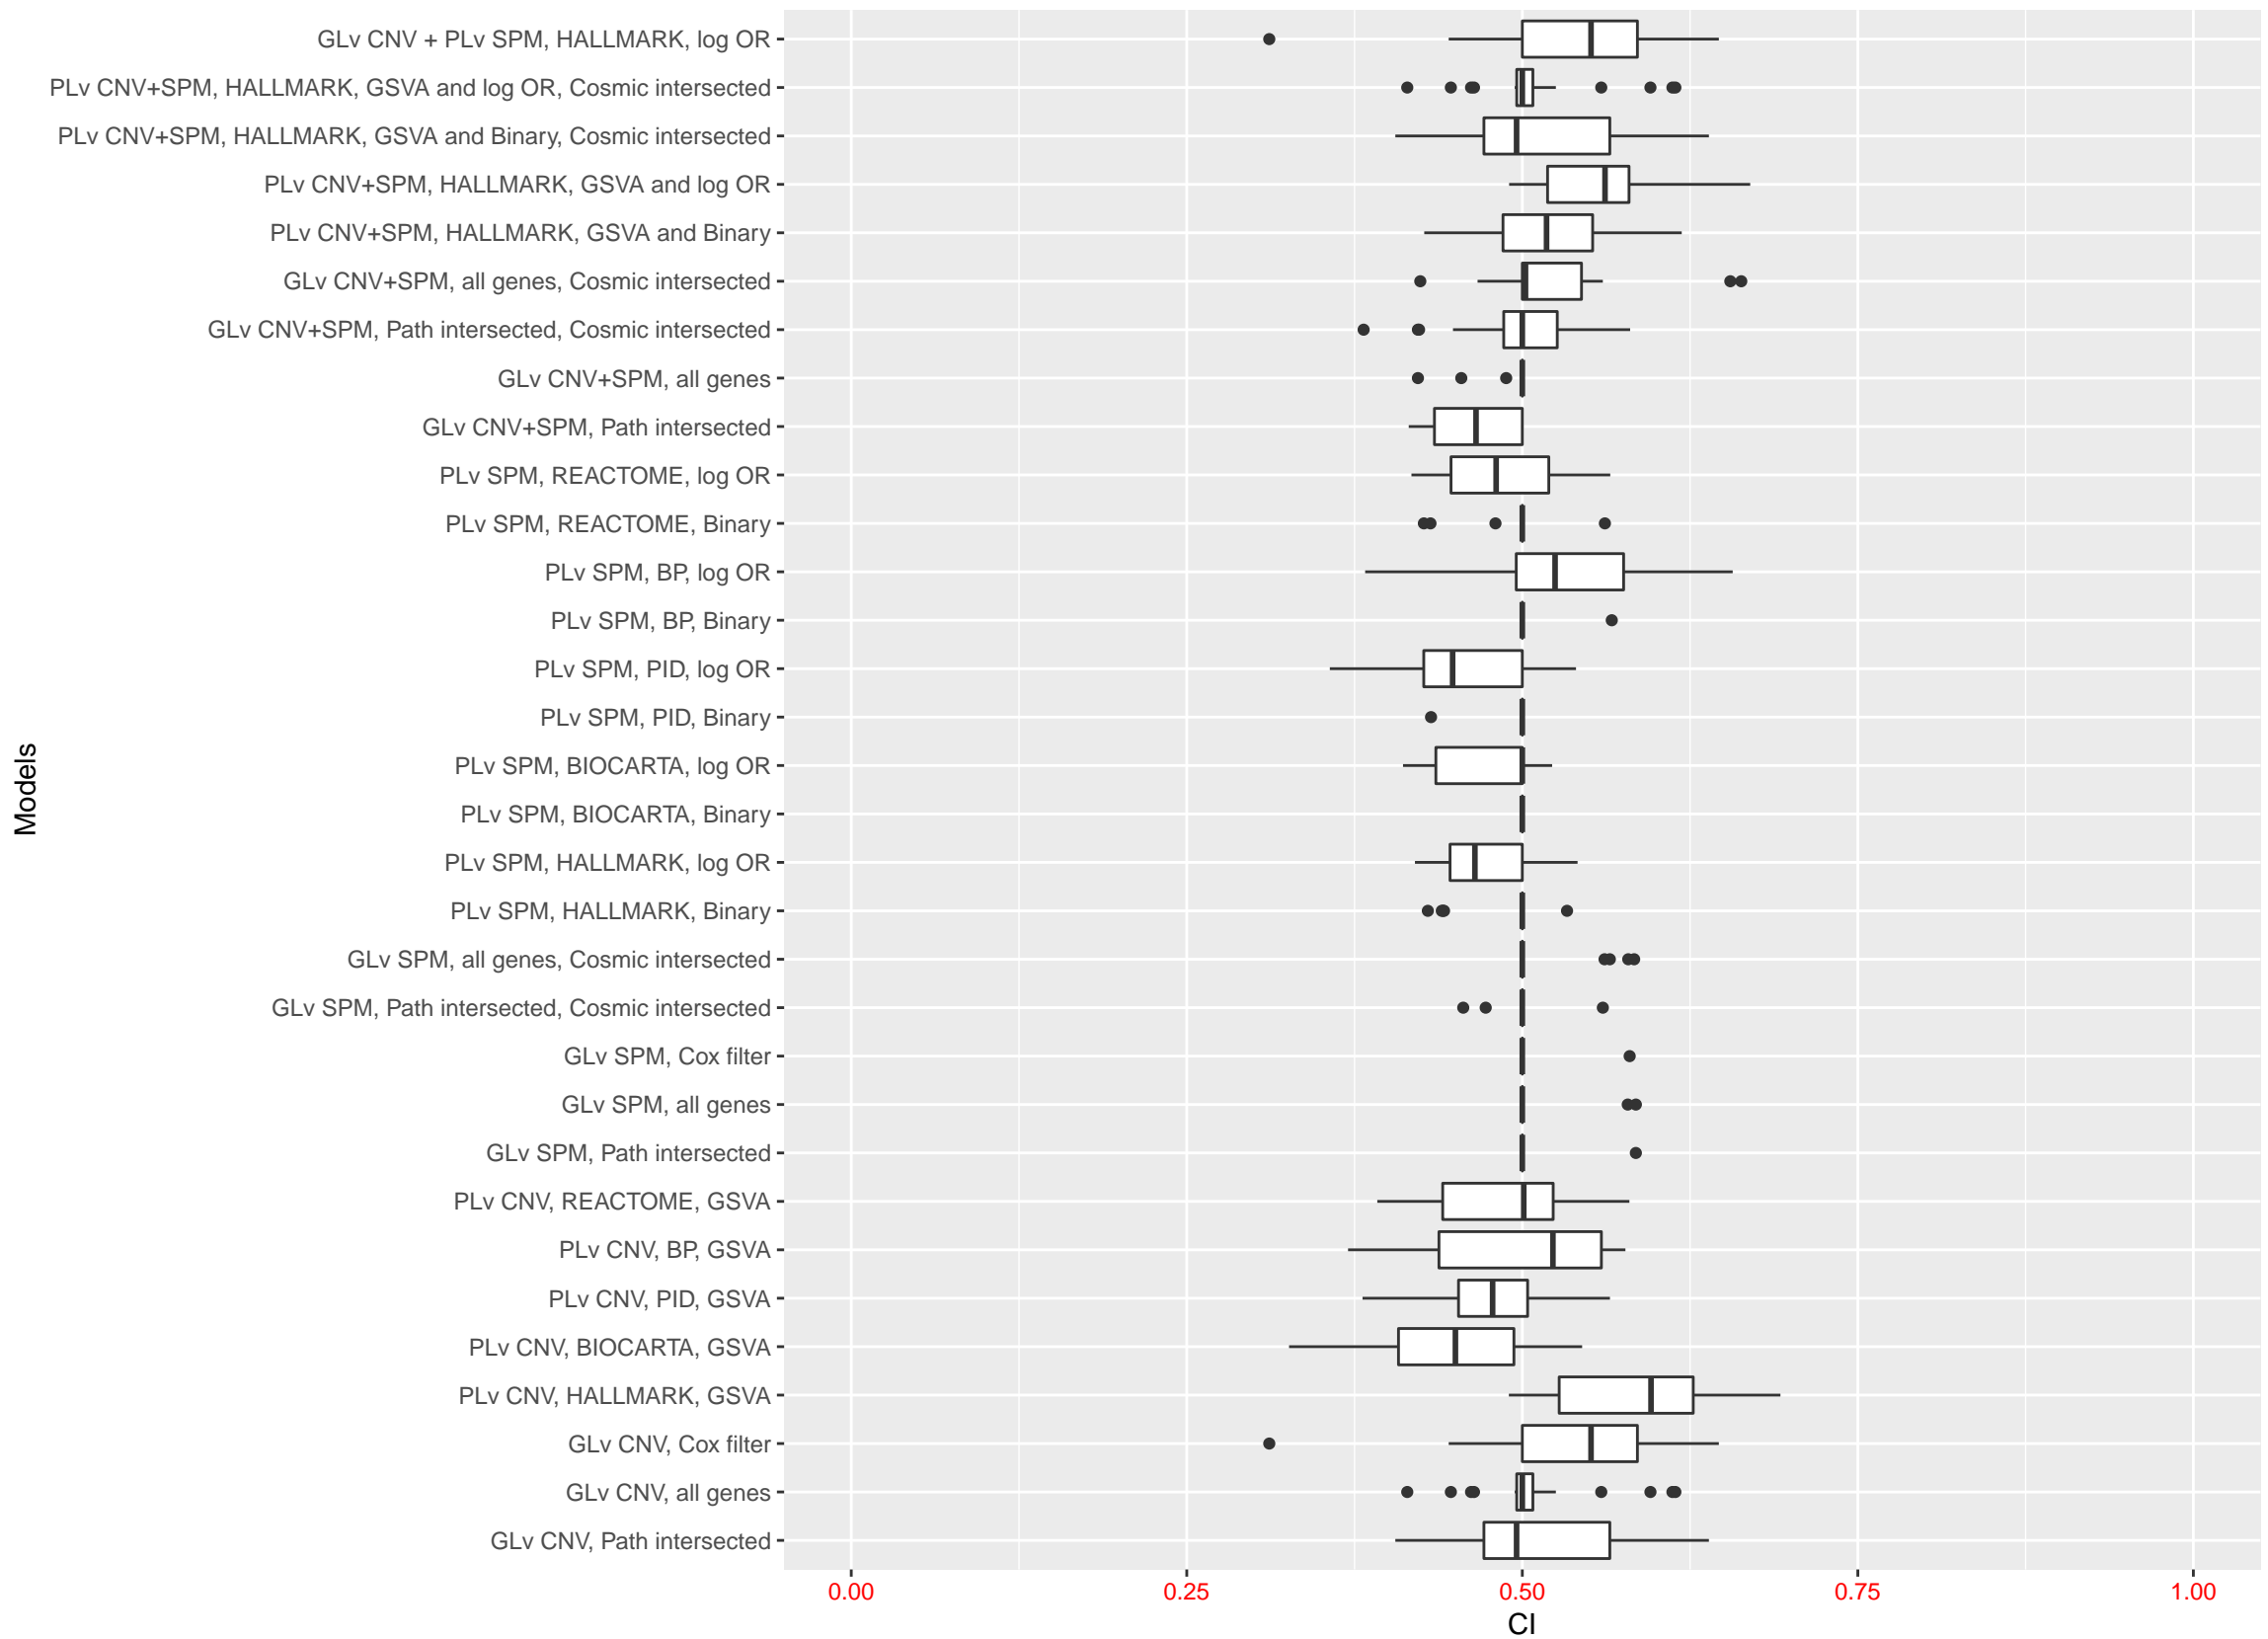

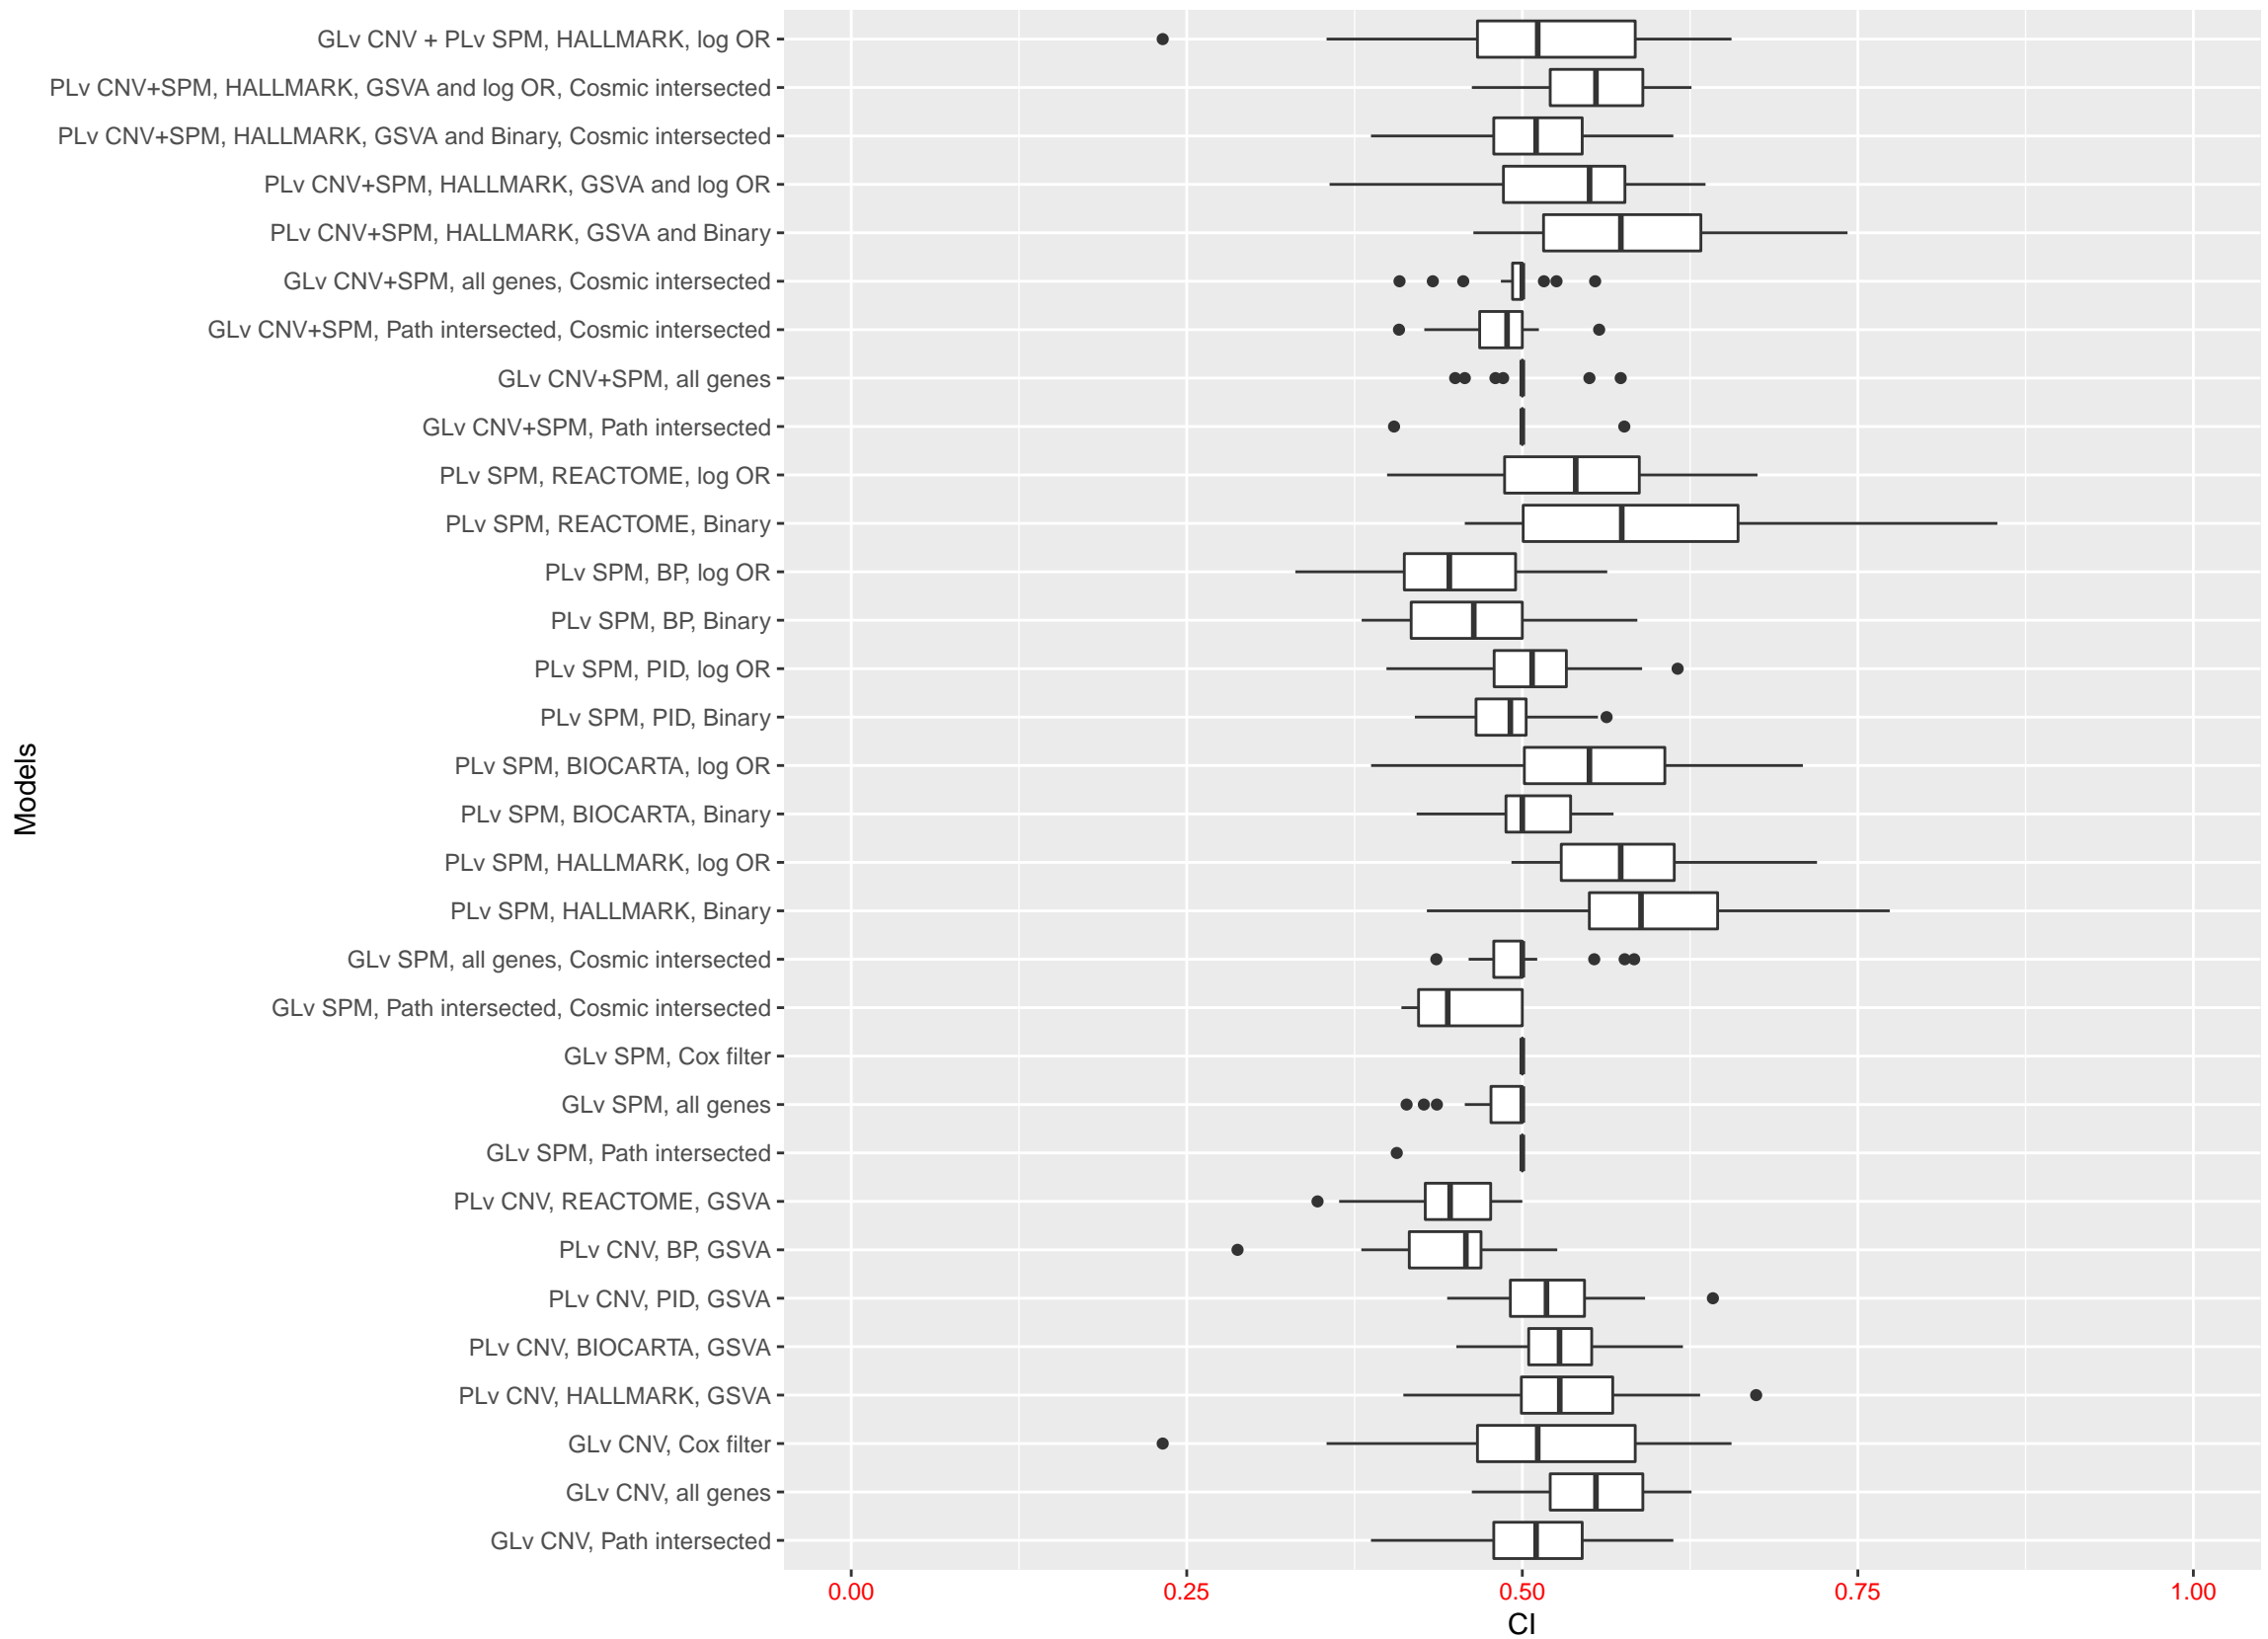

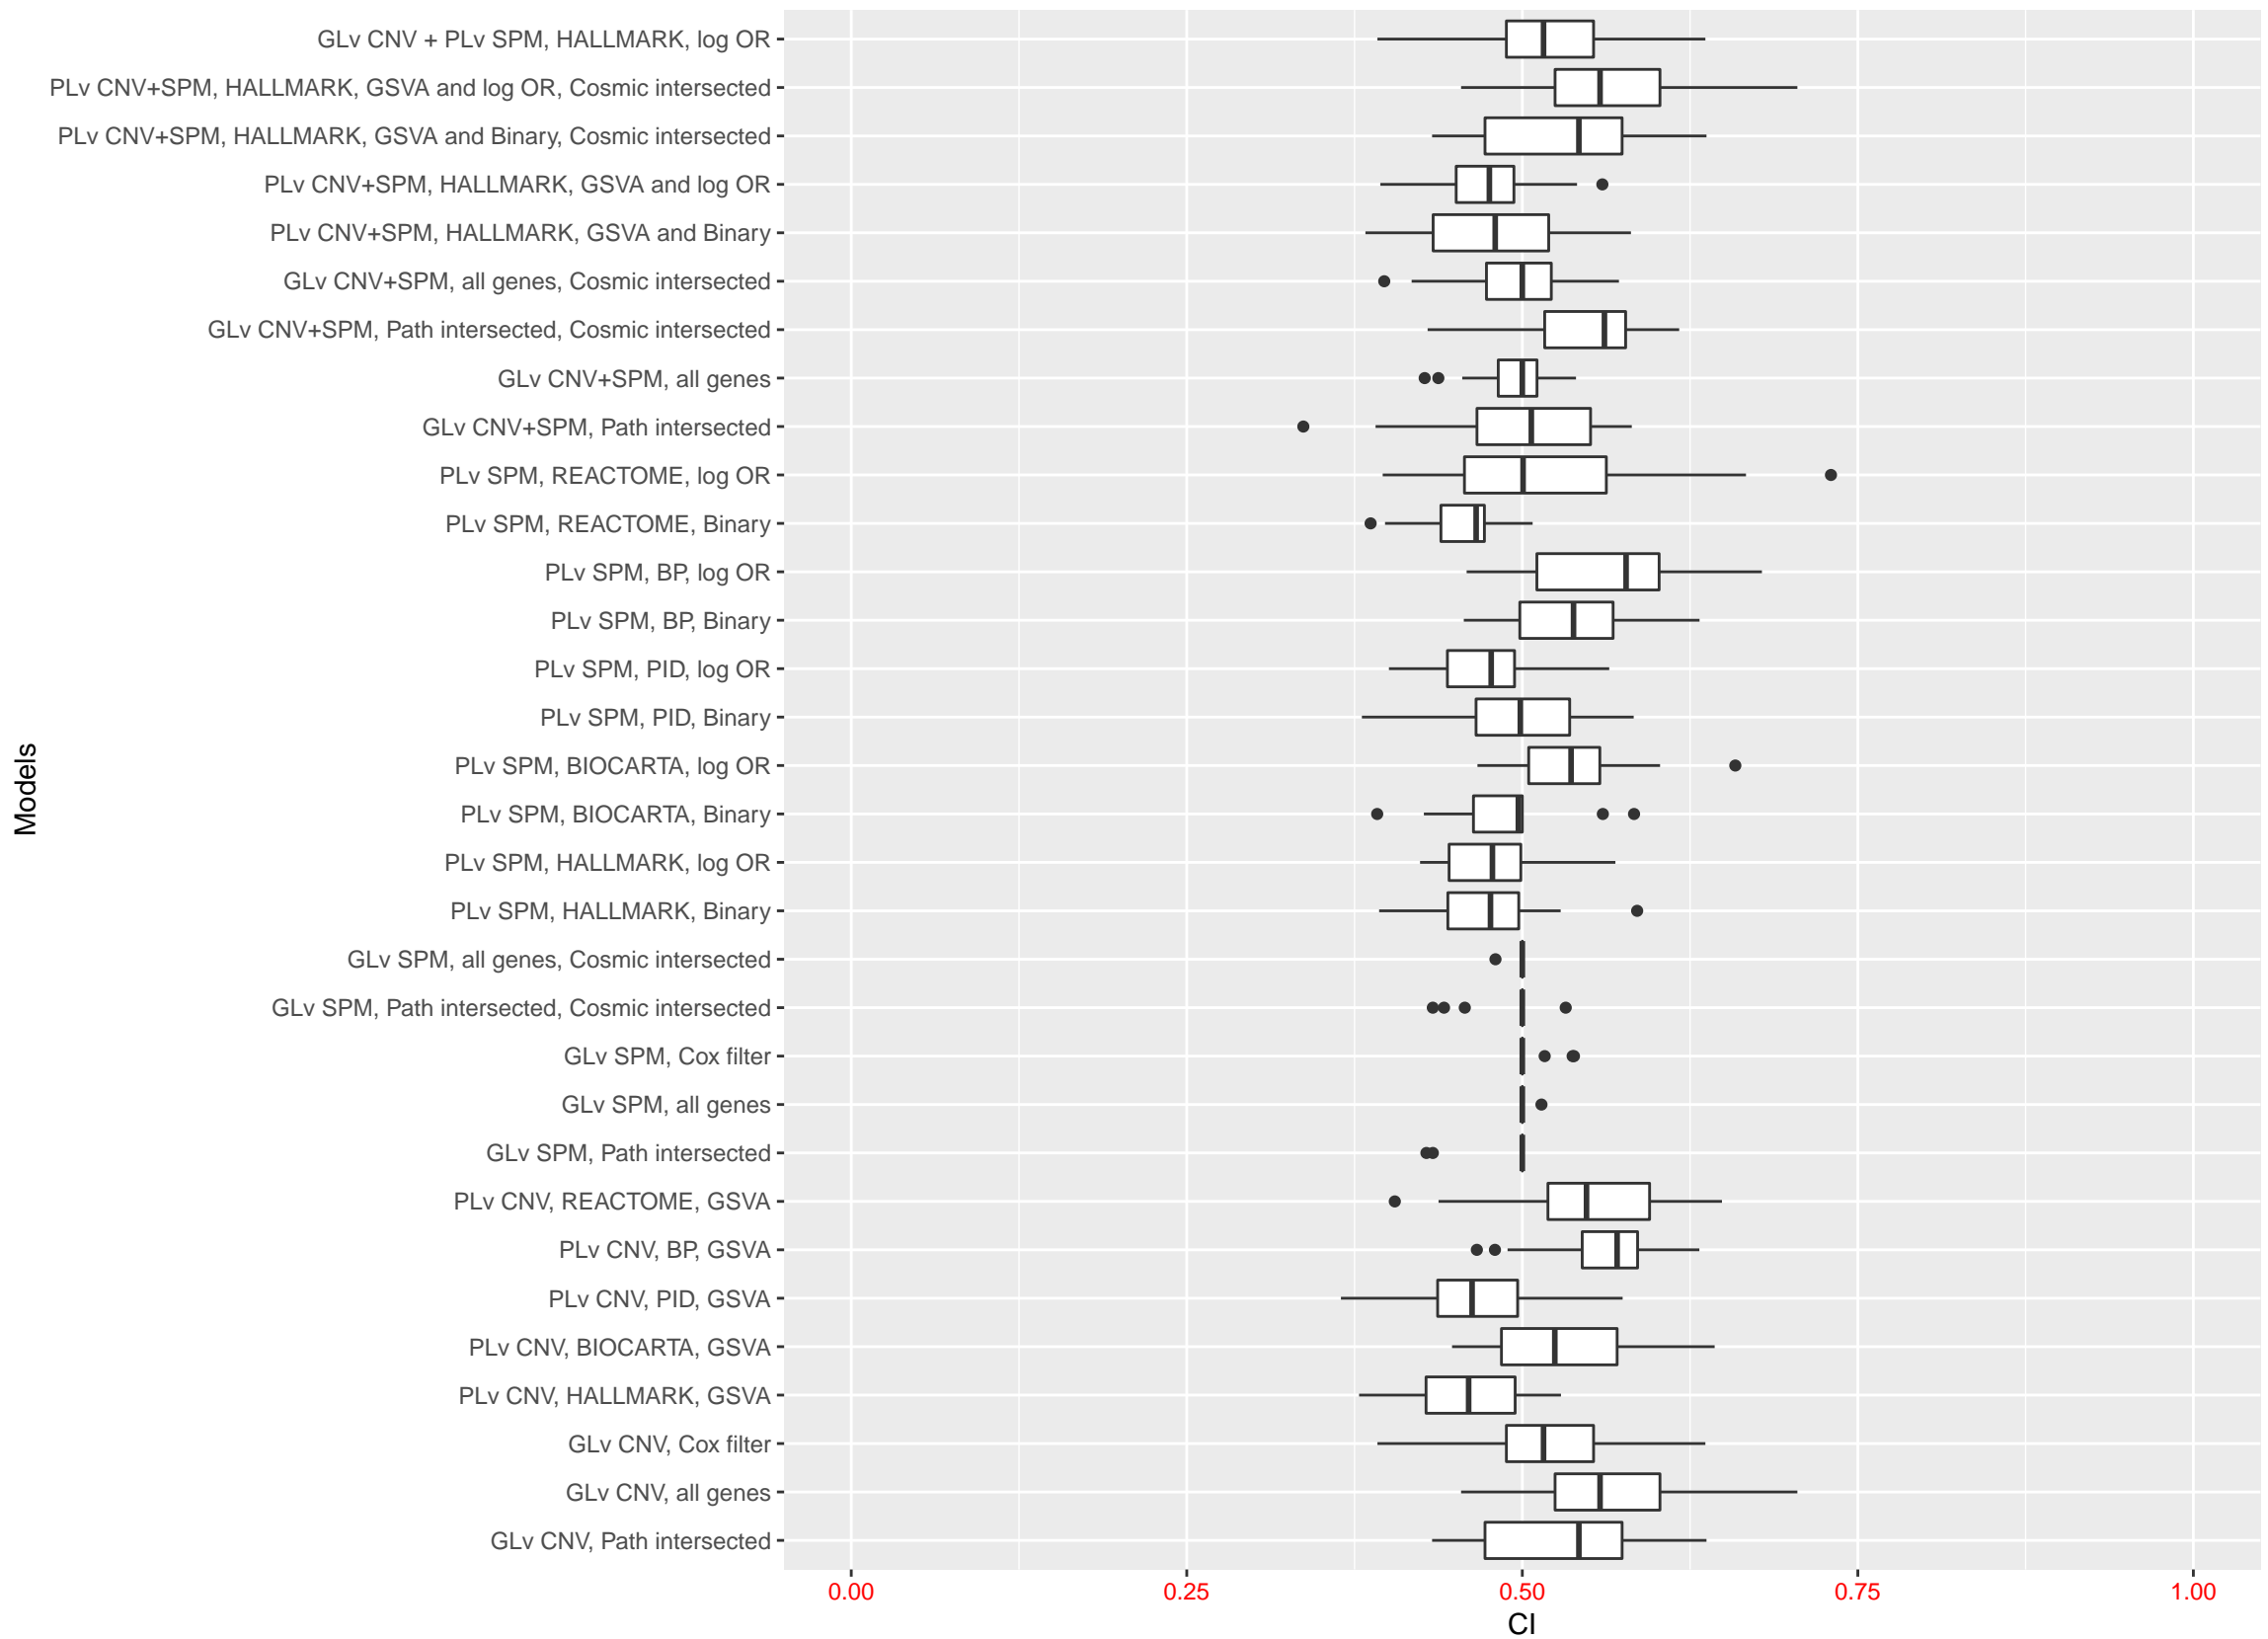

Figure S24 SARC cohort

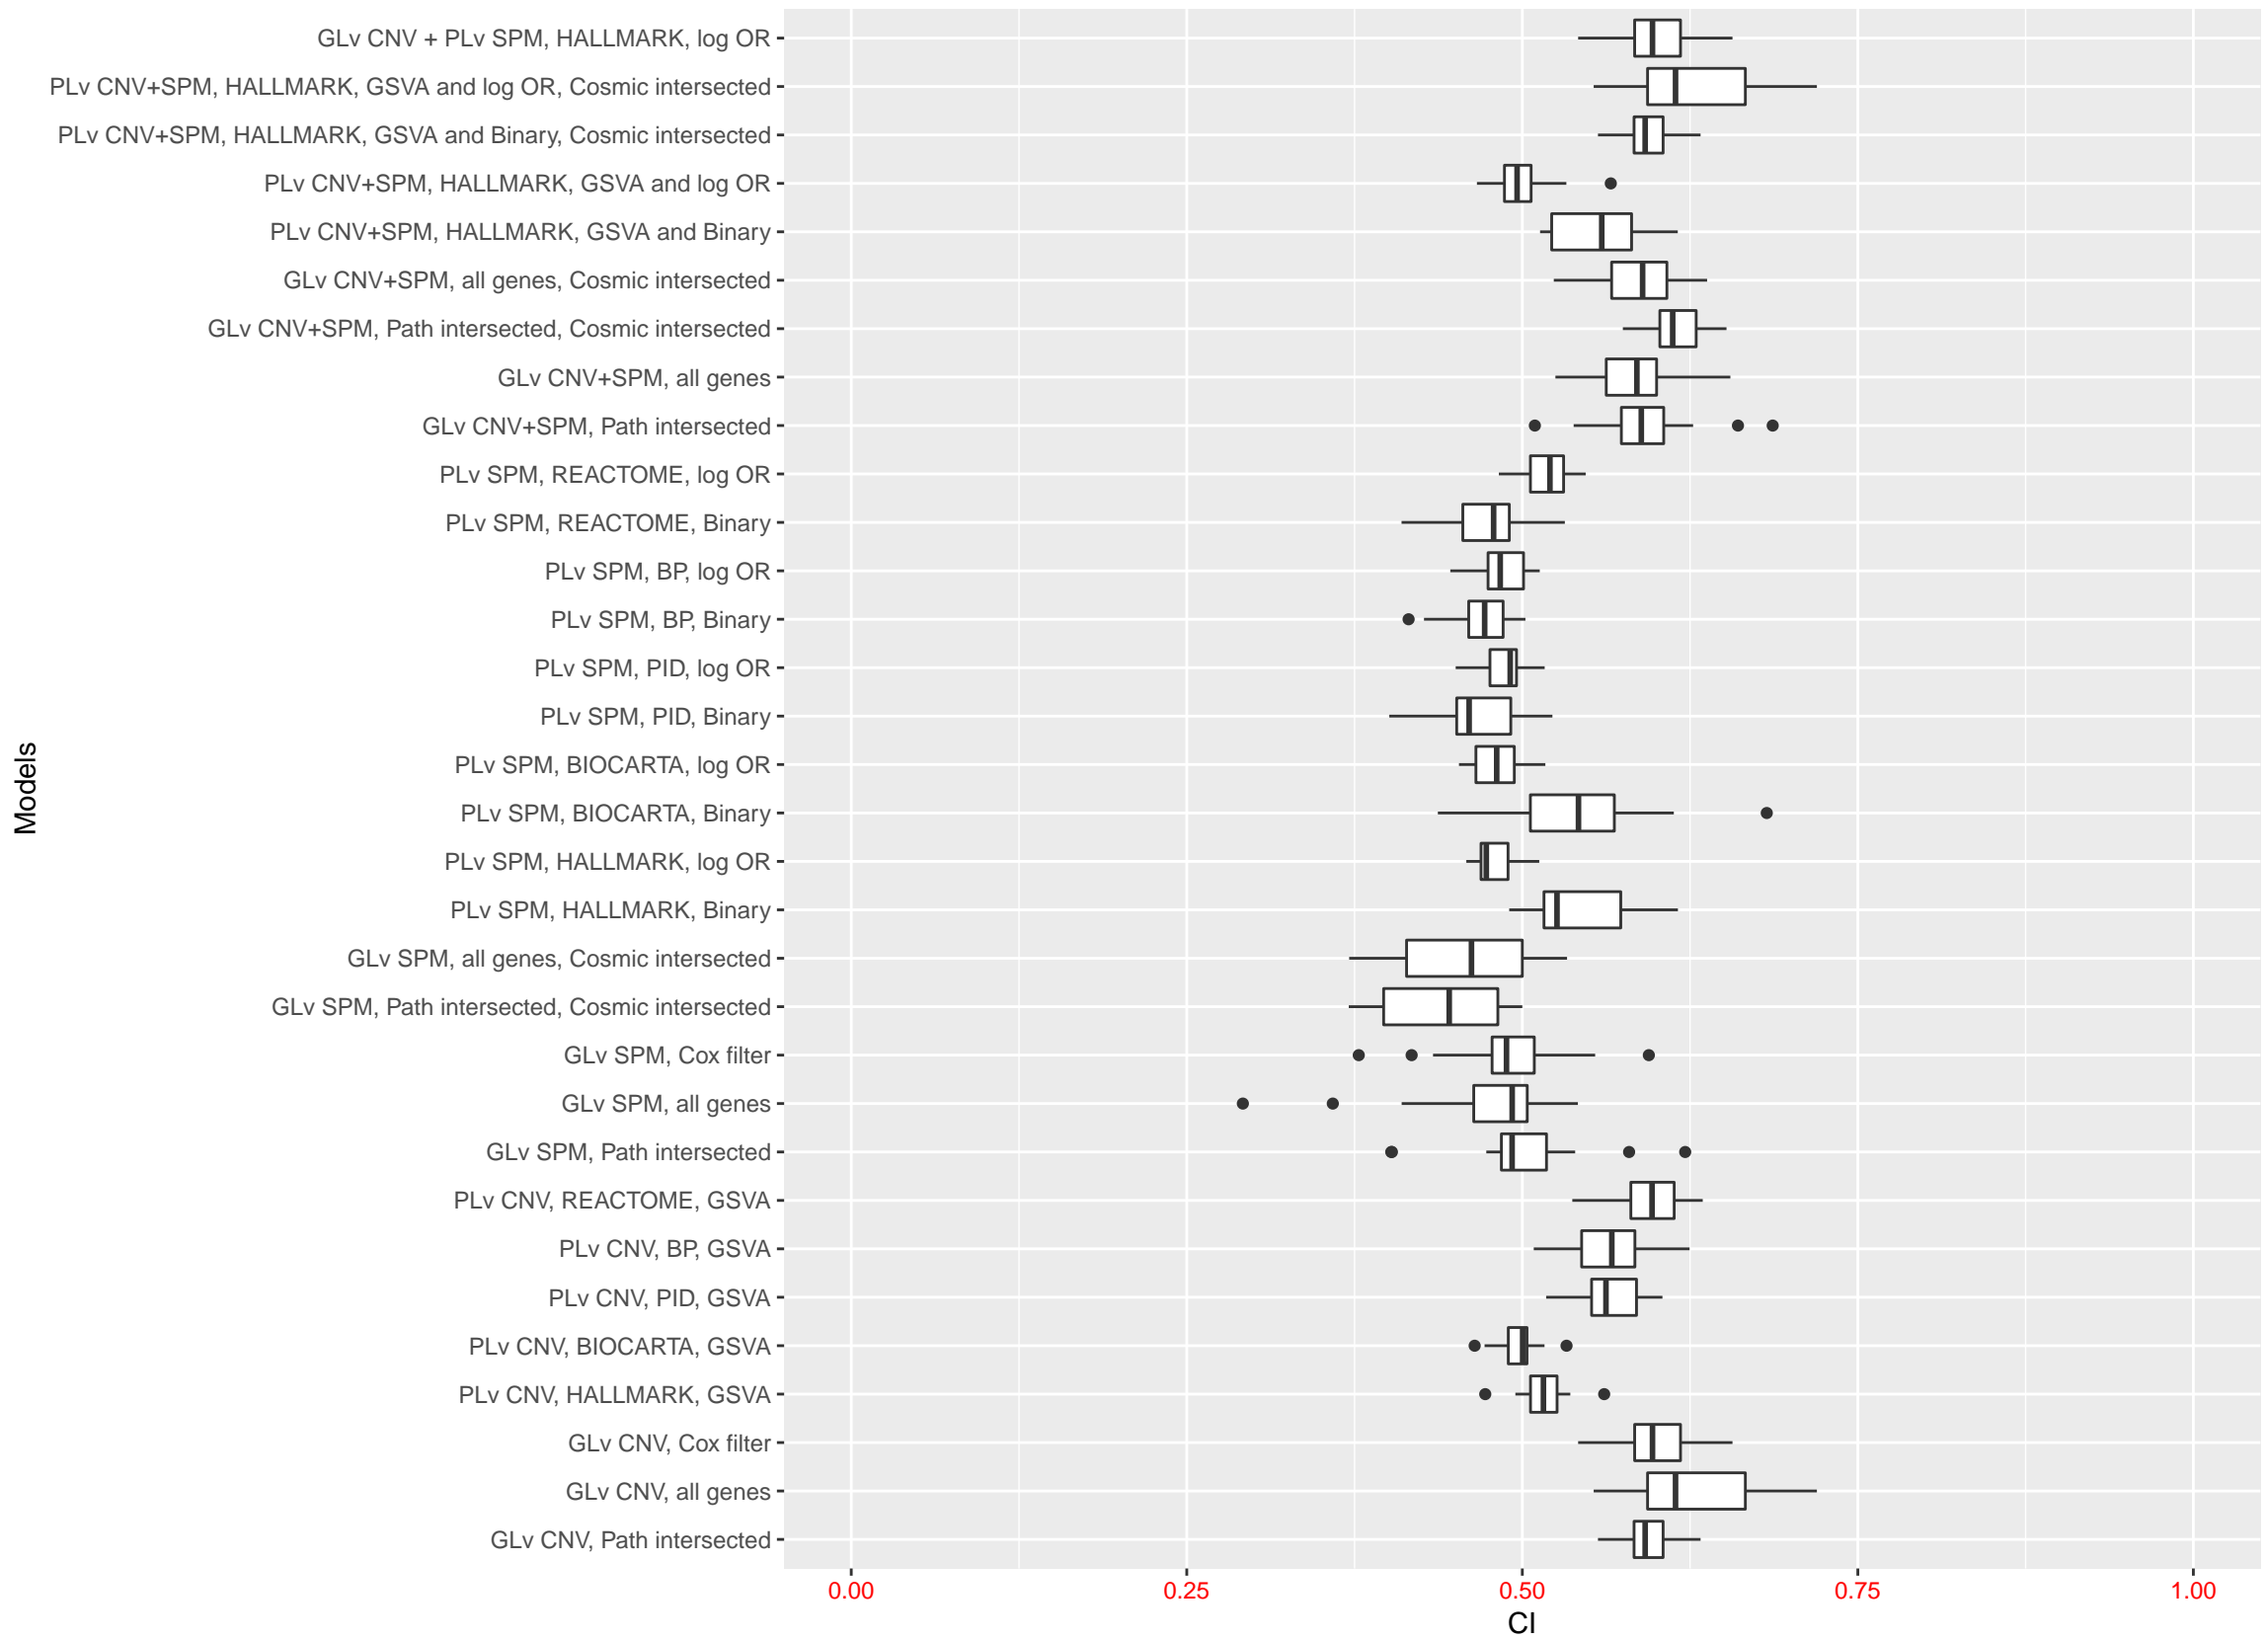

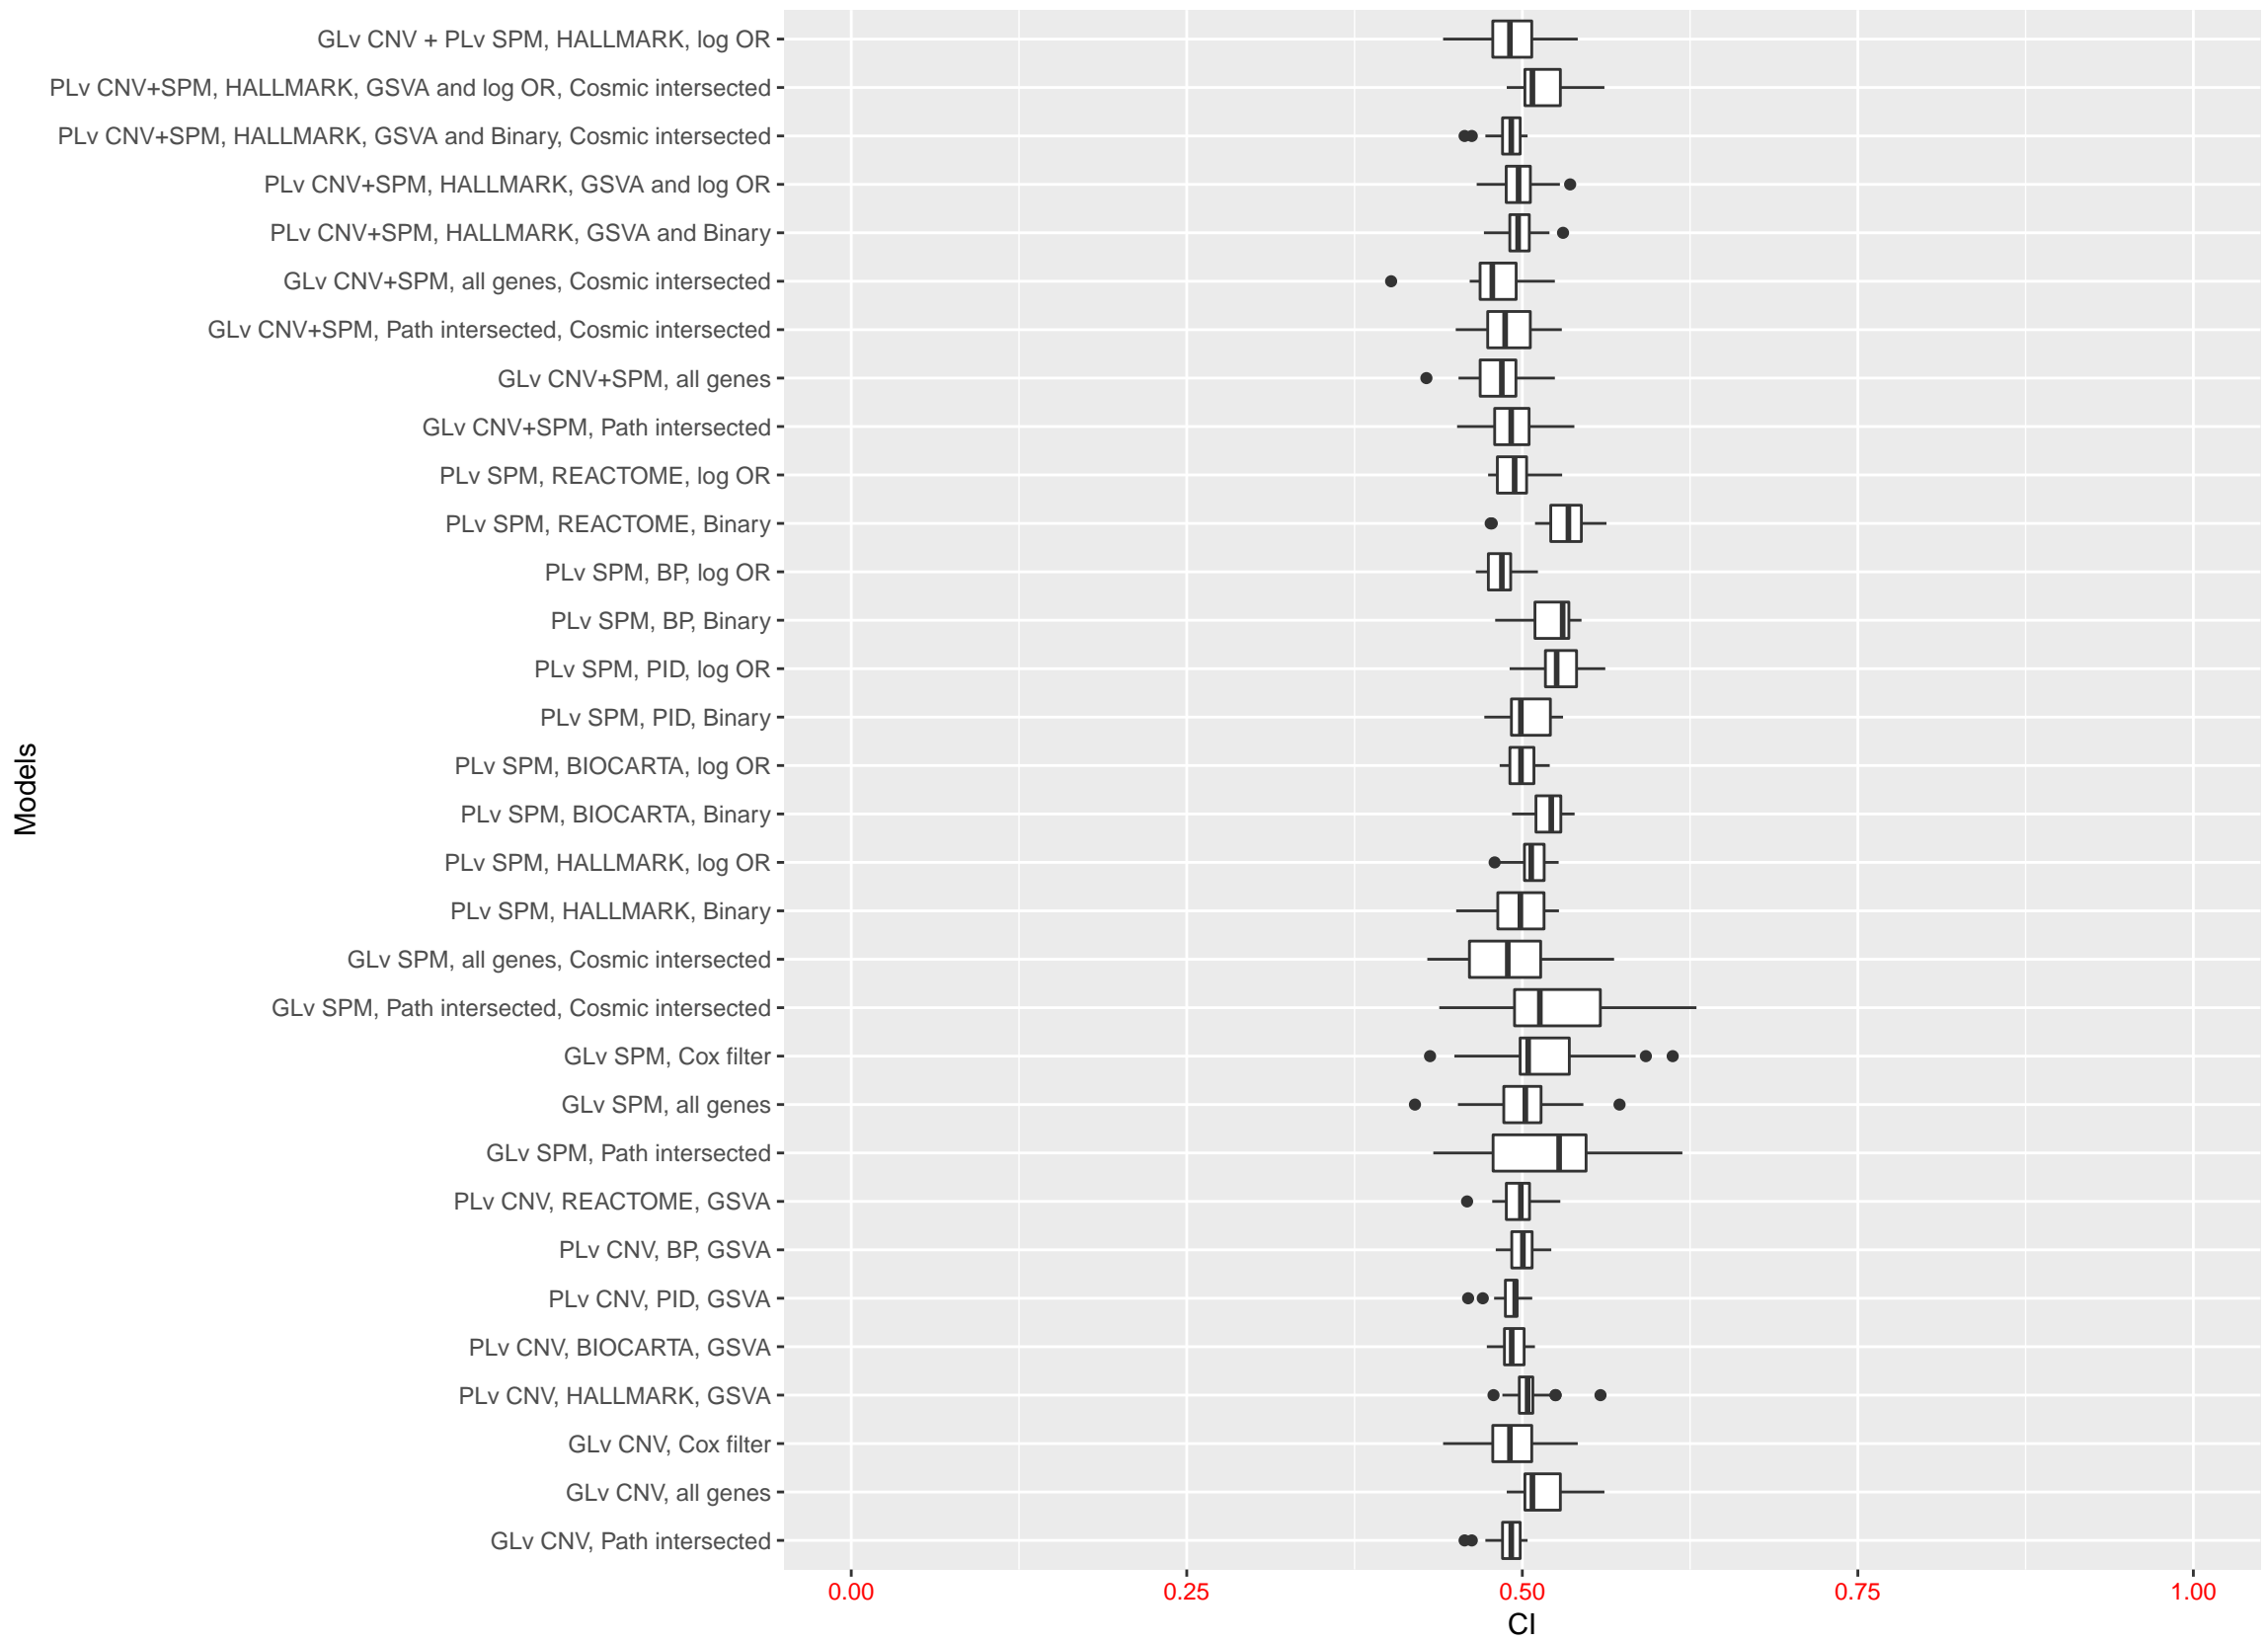

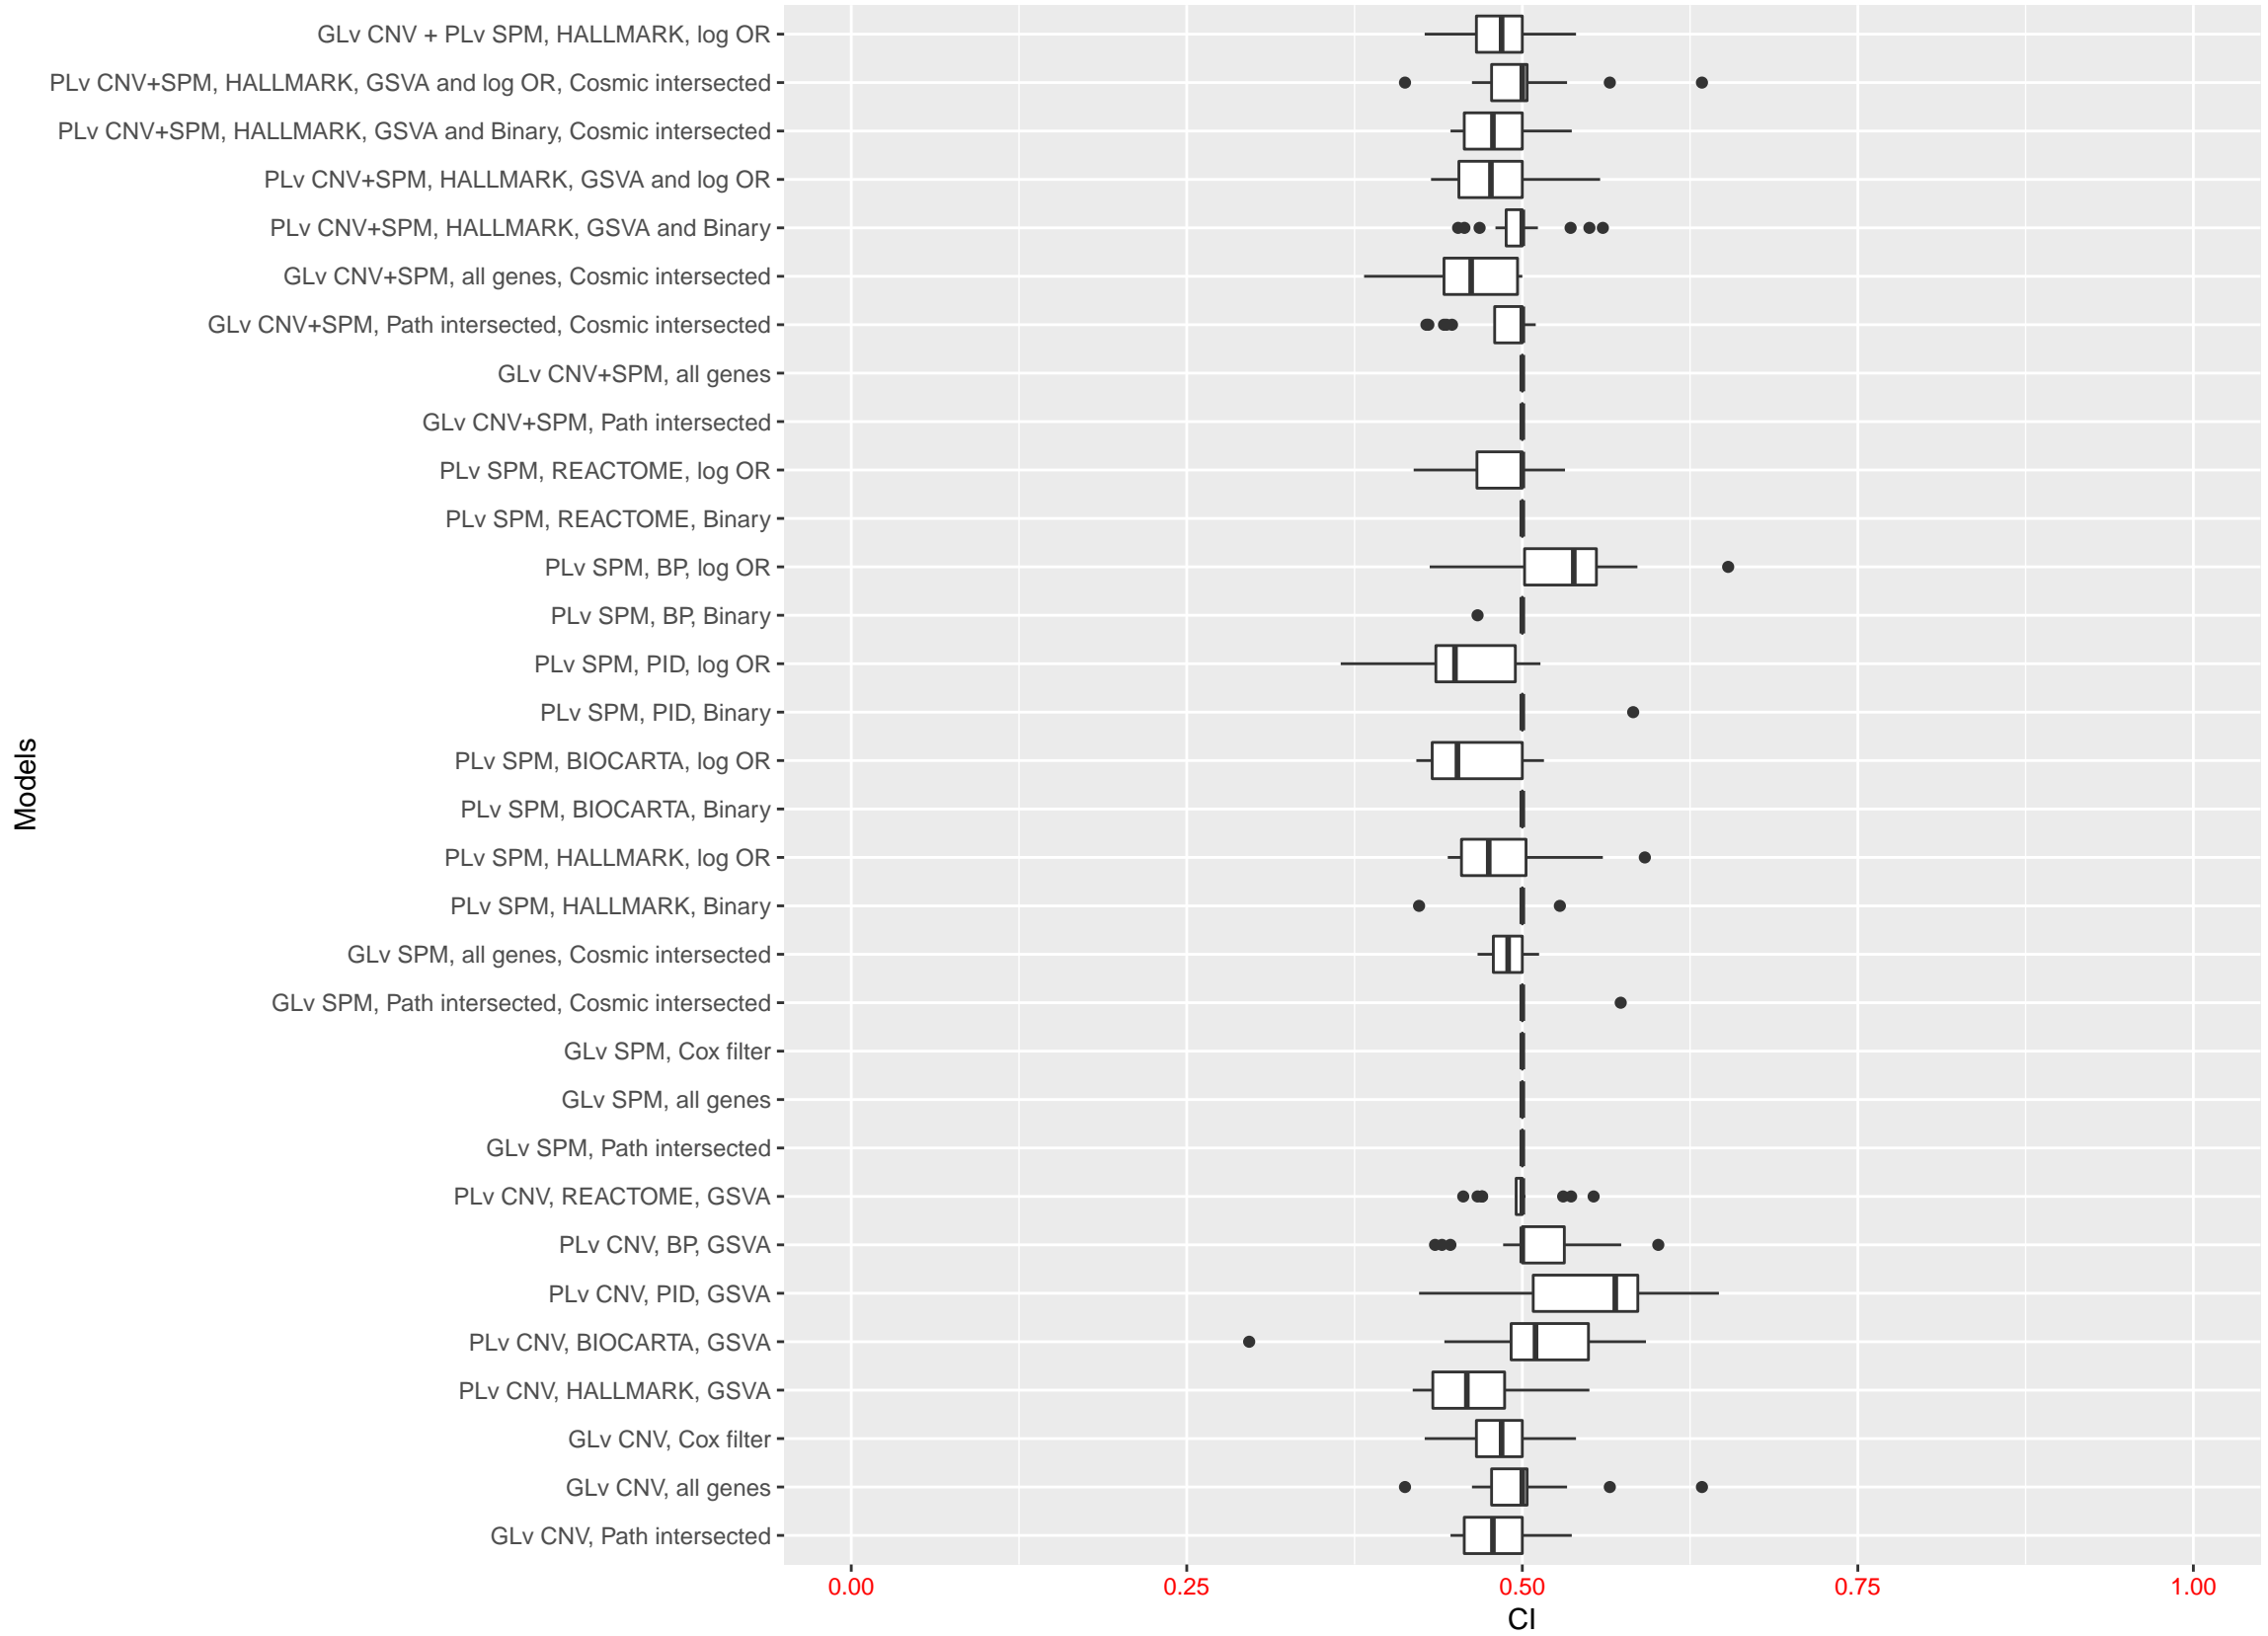

Models

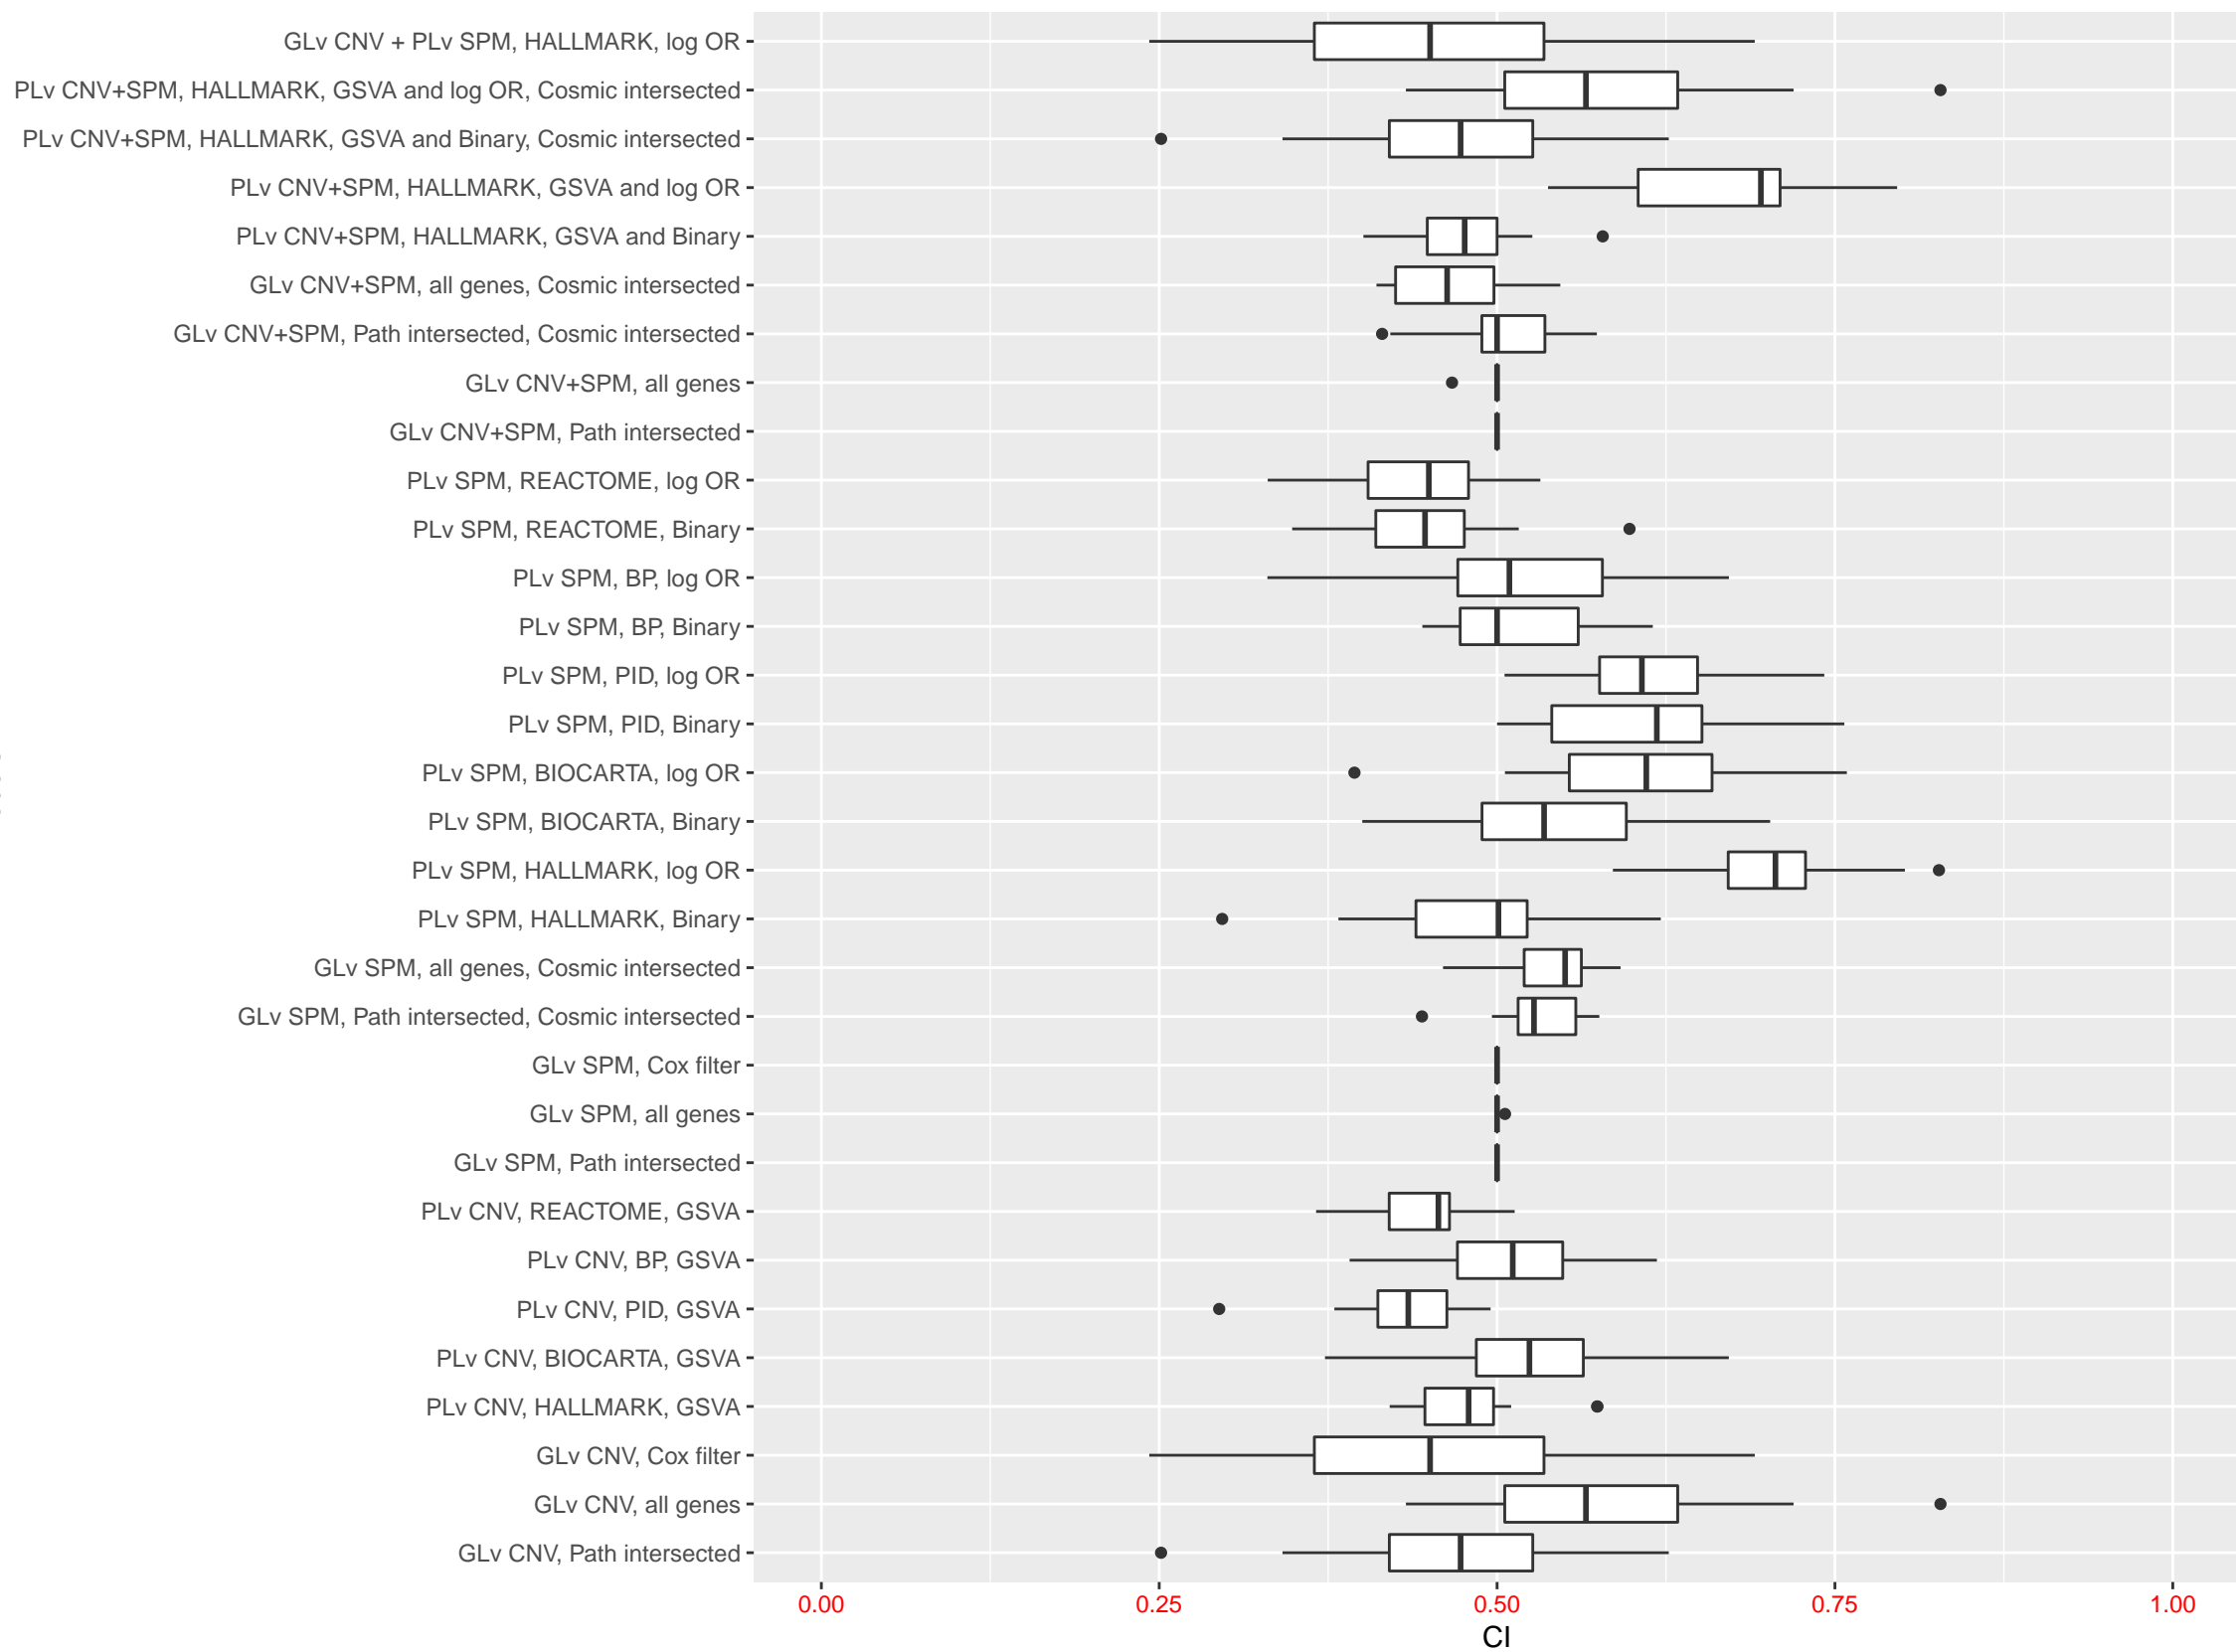

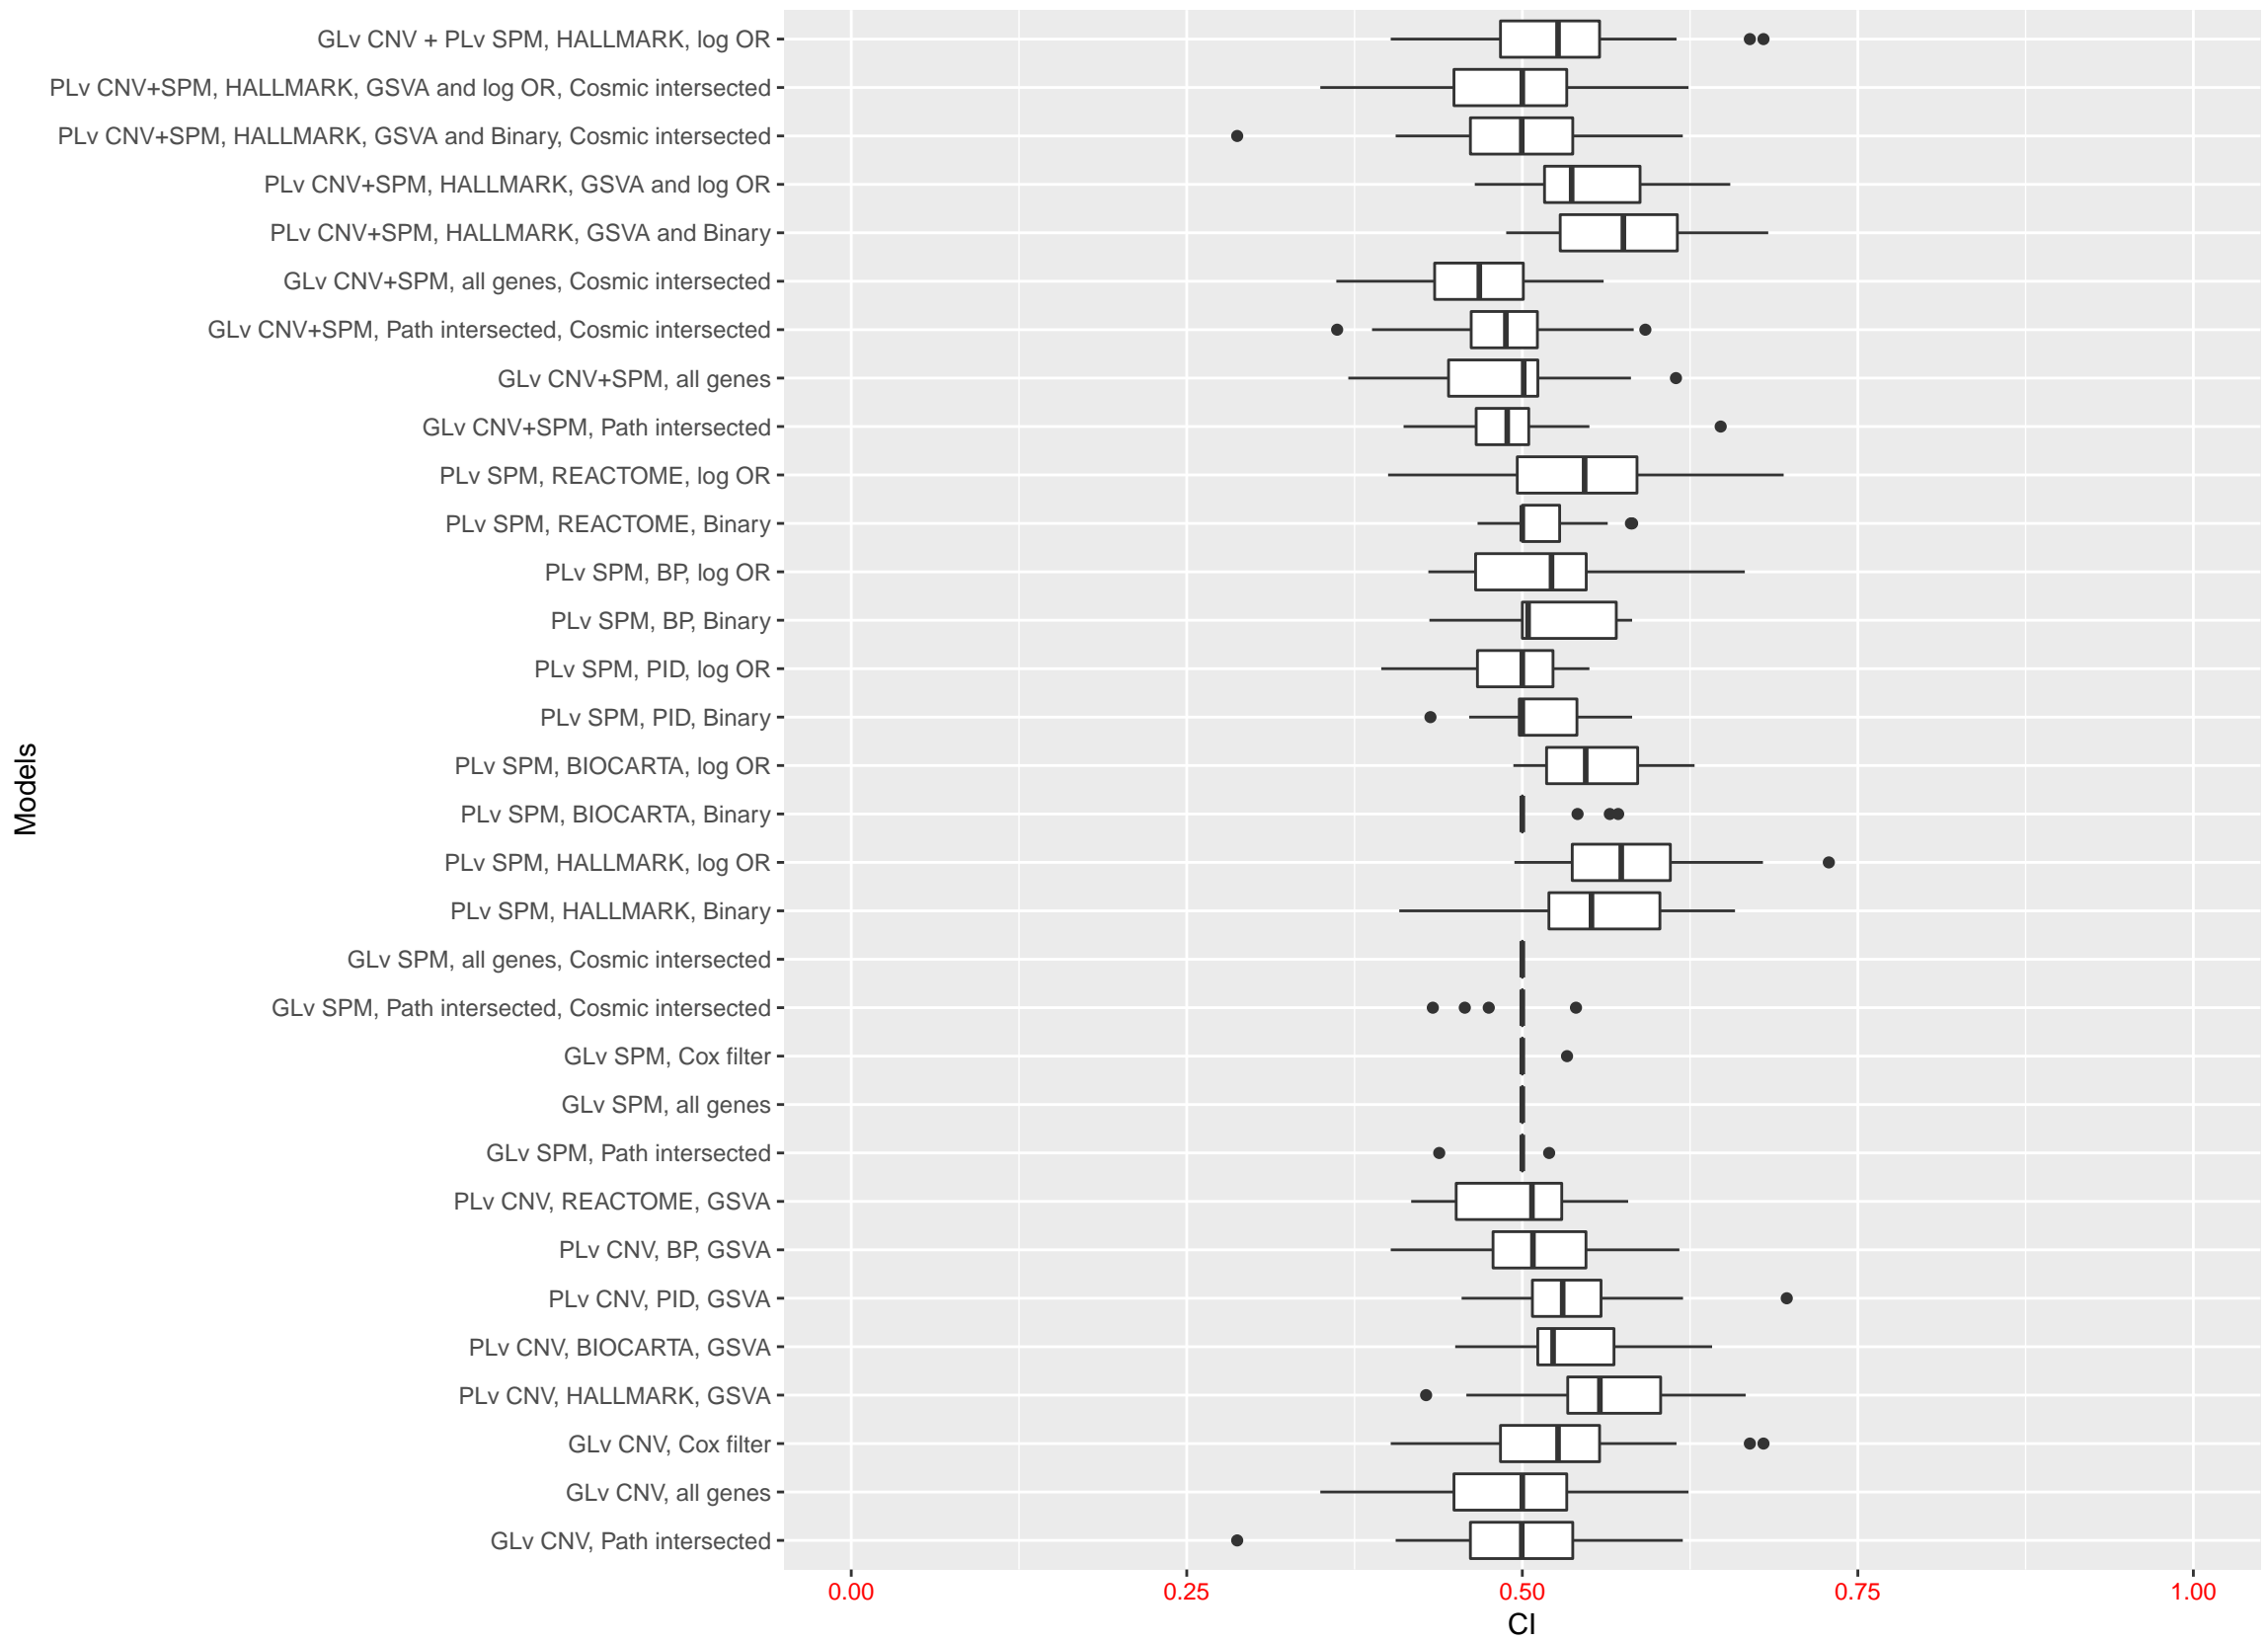

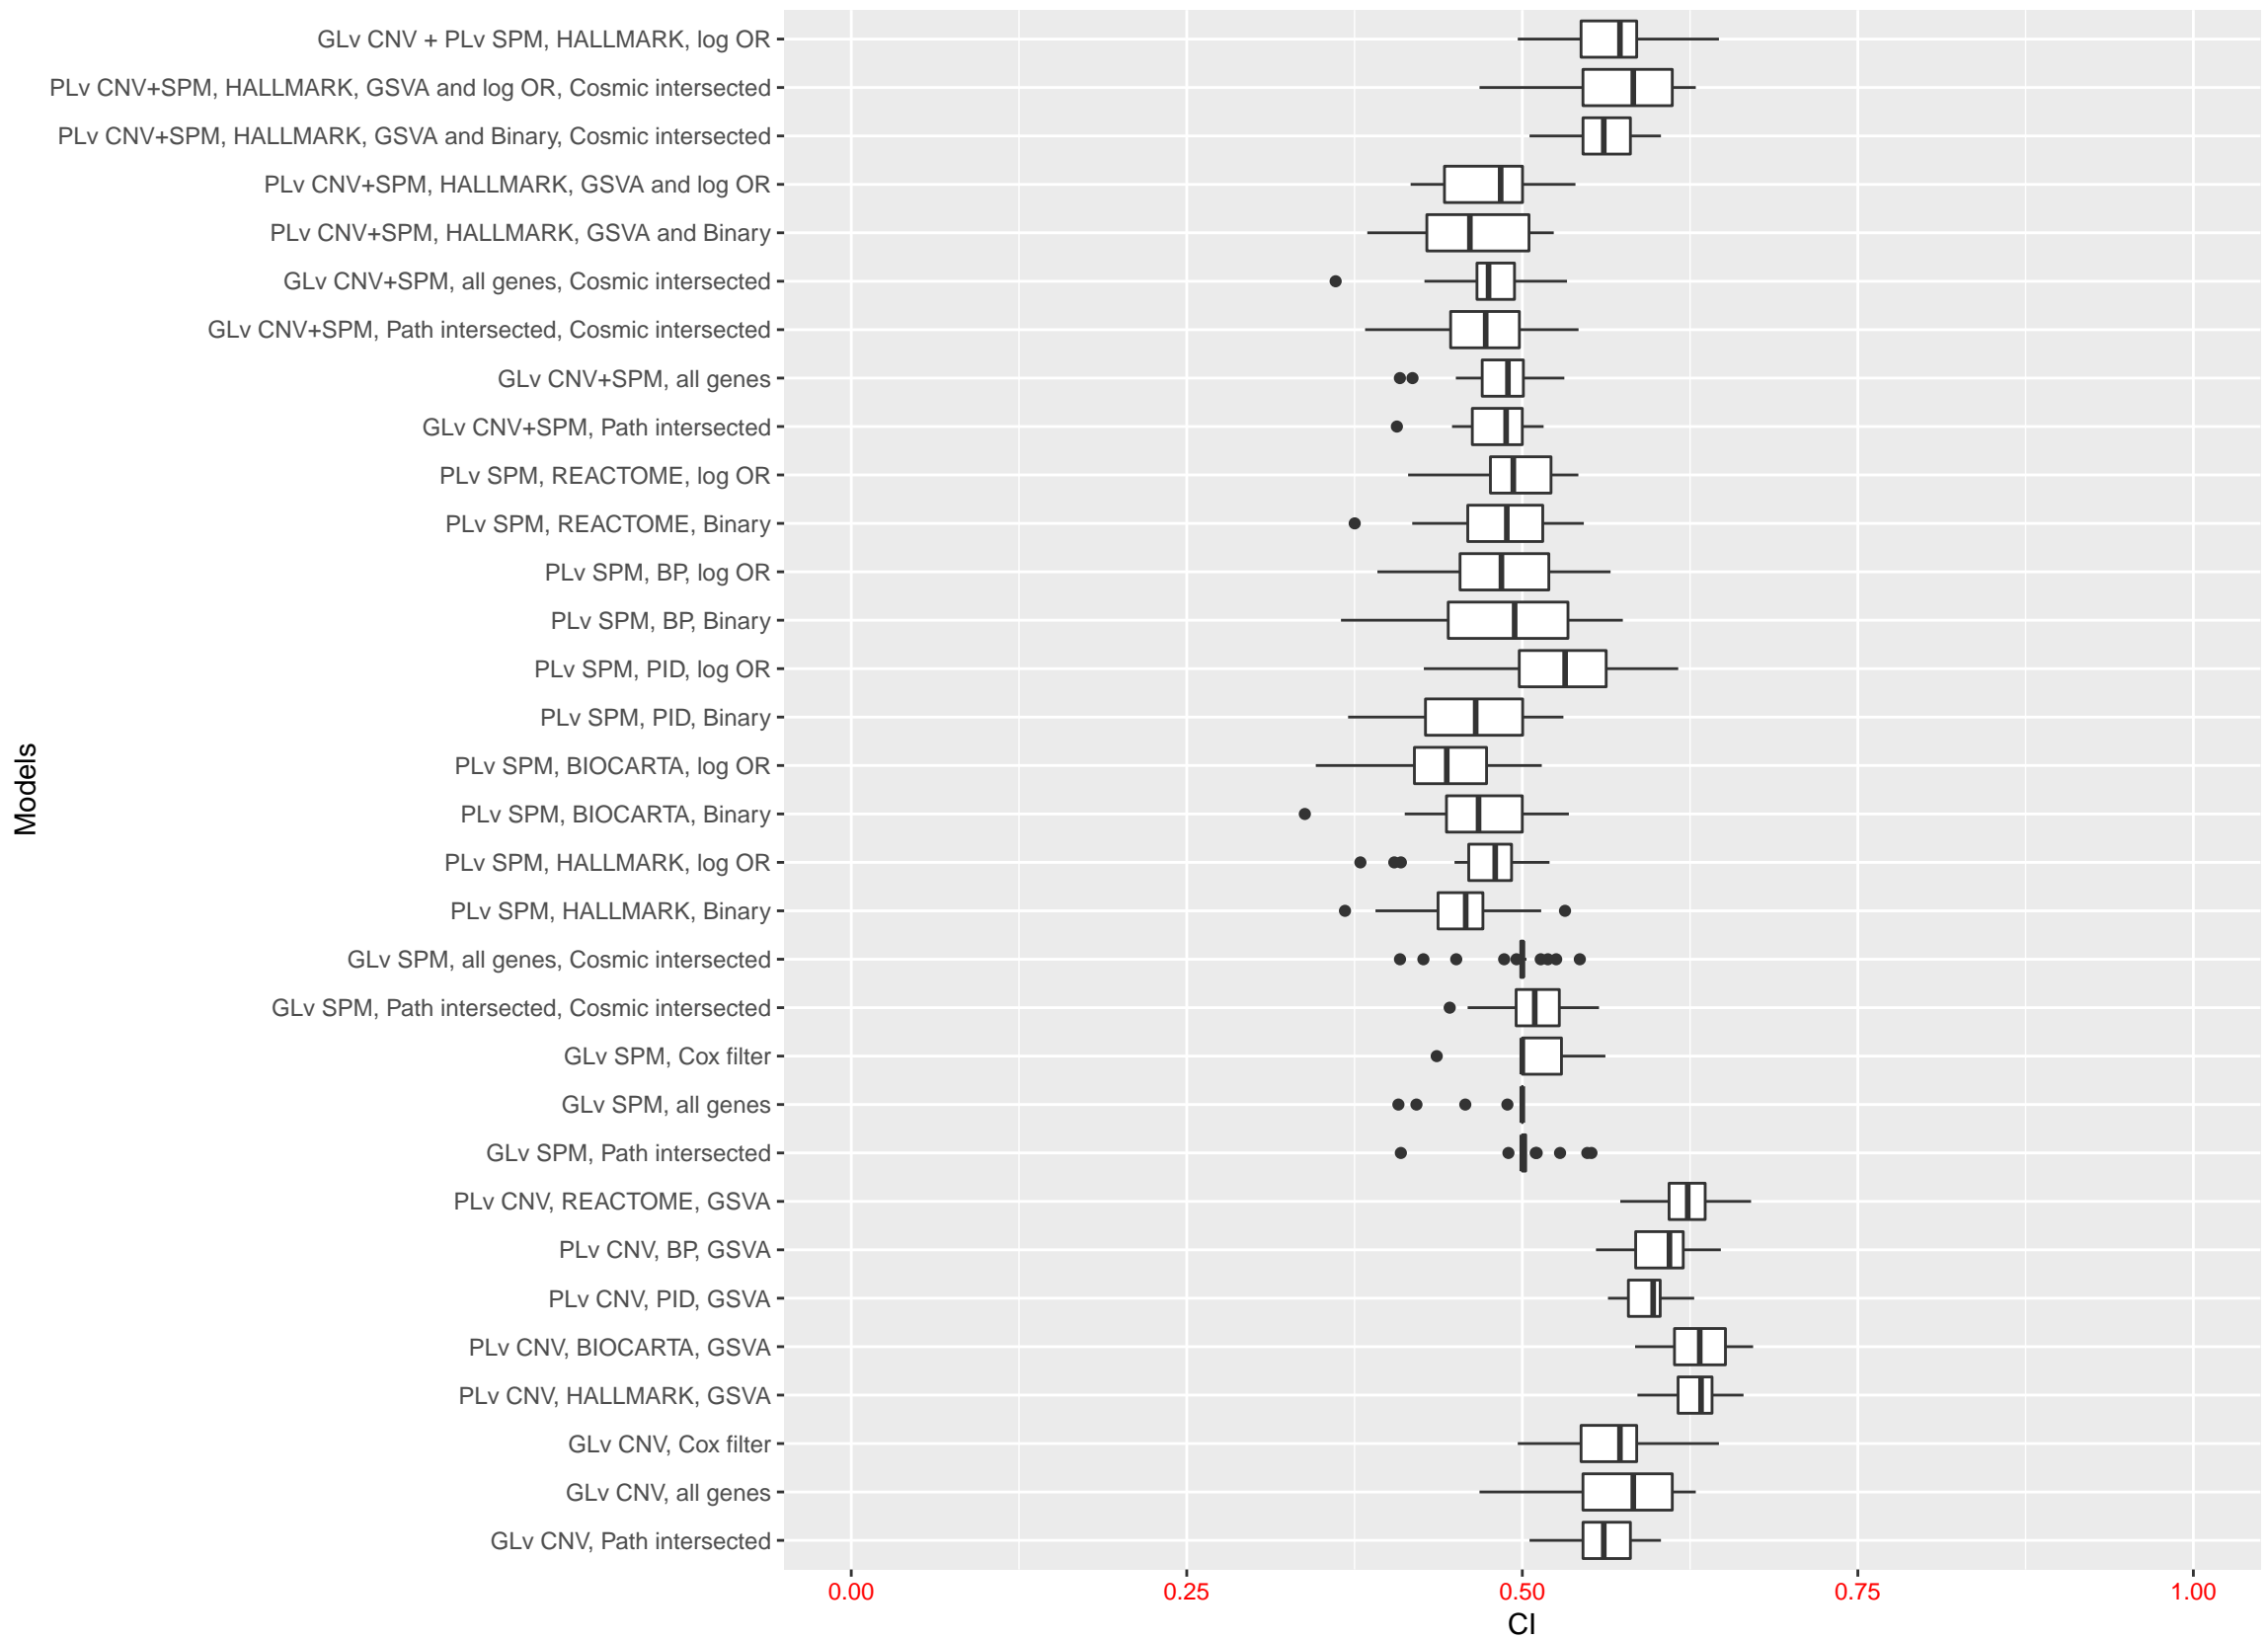

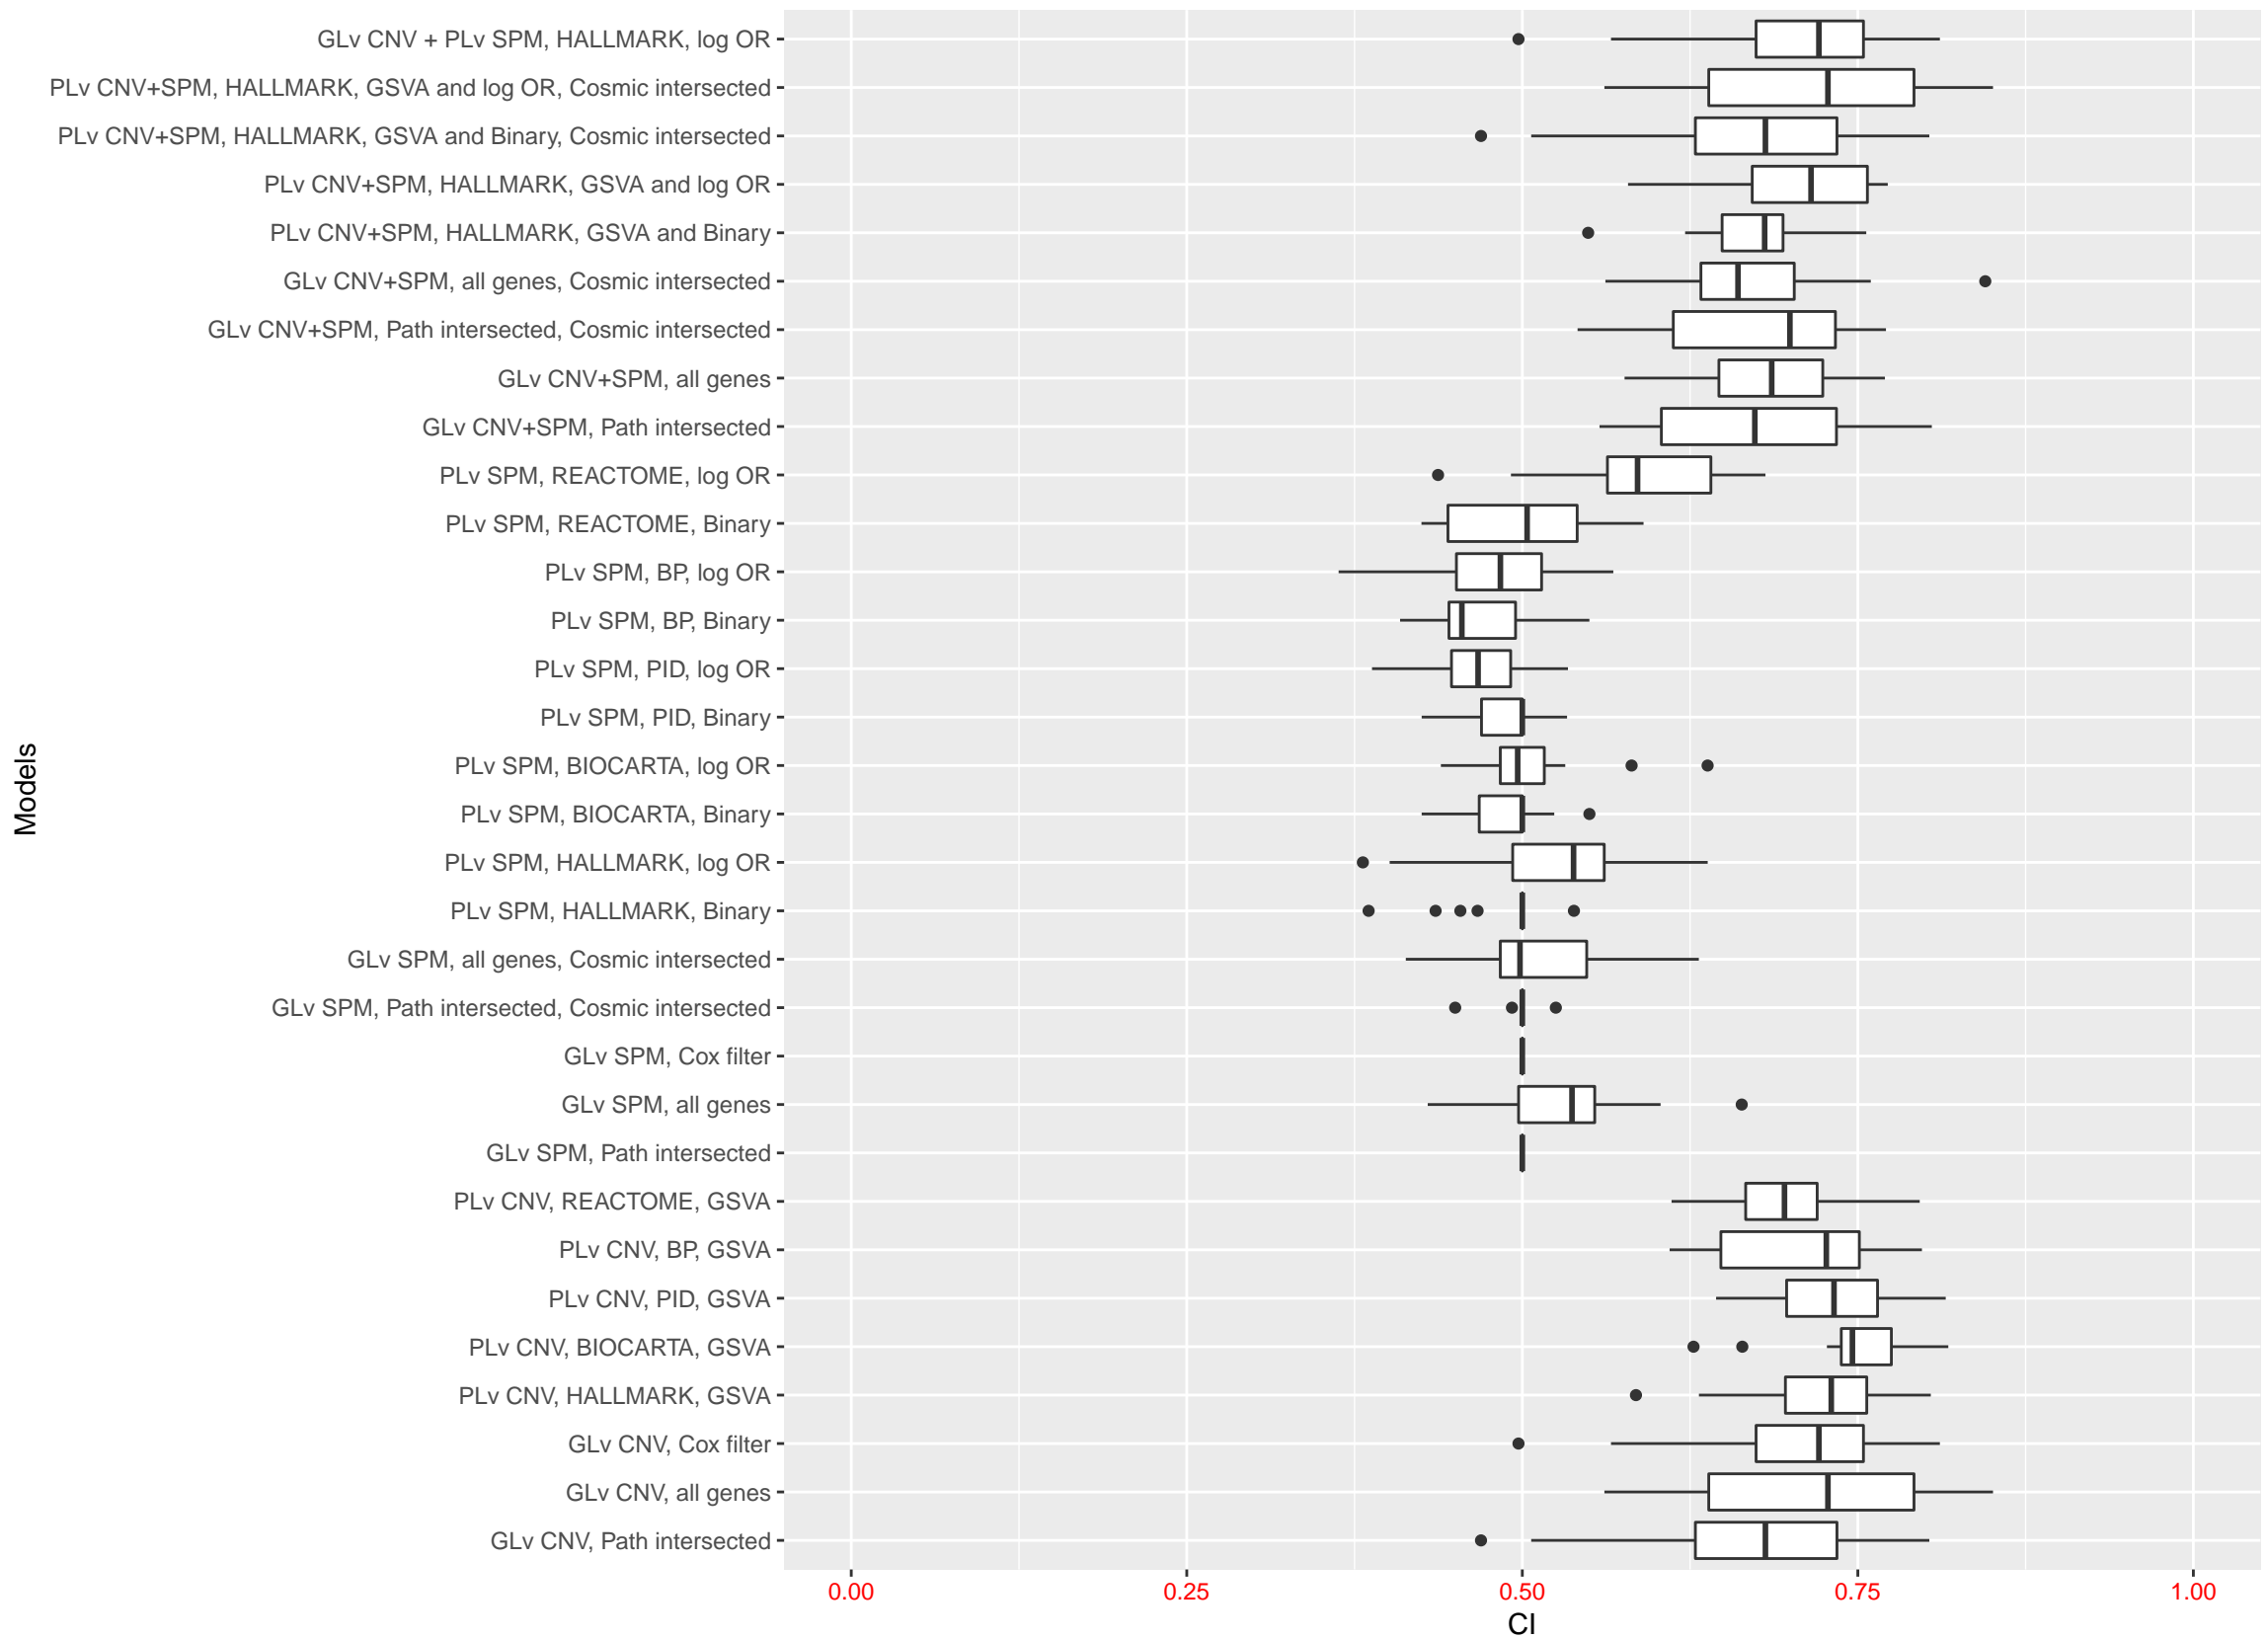

## Results of simulation study for Lasso

To show how Lasso works when there are duplicated variables (perfect collinearity) in the data, we designed a simple simulation study.

1000 observations of 50 variables were randomly drawn from standard normal distribution. 5 variables were true predictors of outcomes with the association that outcomes were the sums of values of these 5 variables and random noises:

$$y_j = \sum_{i=1}^{i=5} P_i + \varepsilon_j$$

$i$  (from 1 to 50) denotes the variables and  $P_1 \dots P_5$  are the 5 true predictors.  $j$  (from 1 to 1000) denotes the observations.  $\varepsilon$  is the random noise drawn from standard normal distribution.

To simulate the perfect collinearity situation, we duplicated the 5 true predictors  $P_1 \dots P_5$  as  $P_{1\_rep} \dots P_{5\_rep}$  and added them into the data. With this simulation data, we fitted Lasso with the shrinkage parameter lambda chosen by cross validation.

Figure S31 below shows the solution path of fitted model. Each curve corresponds to a variable. It shows the path of coefficients against the varied lambda. The two vertical cutoff lines indicate lambda value that gives minimum mean cross-validated error (left panel) and that gives the most regularized model such that error is within one standard error of the minimum (right panel). As we can see from Figure S31, Lasso was not guaranteed to discard duplicated variables no matter which lambda we chose.

The R Markdown file of this simulation study is also attached after Figure S31.

Figure S31 Solution Path

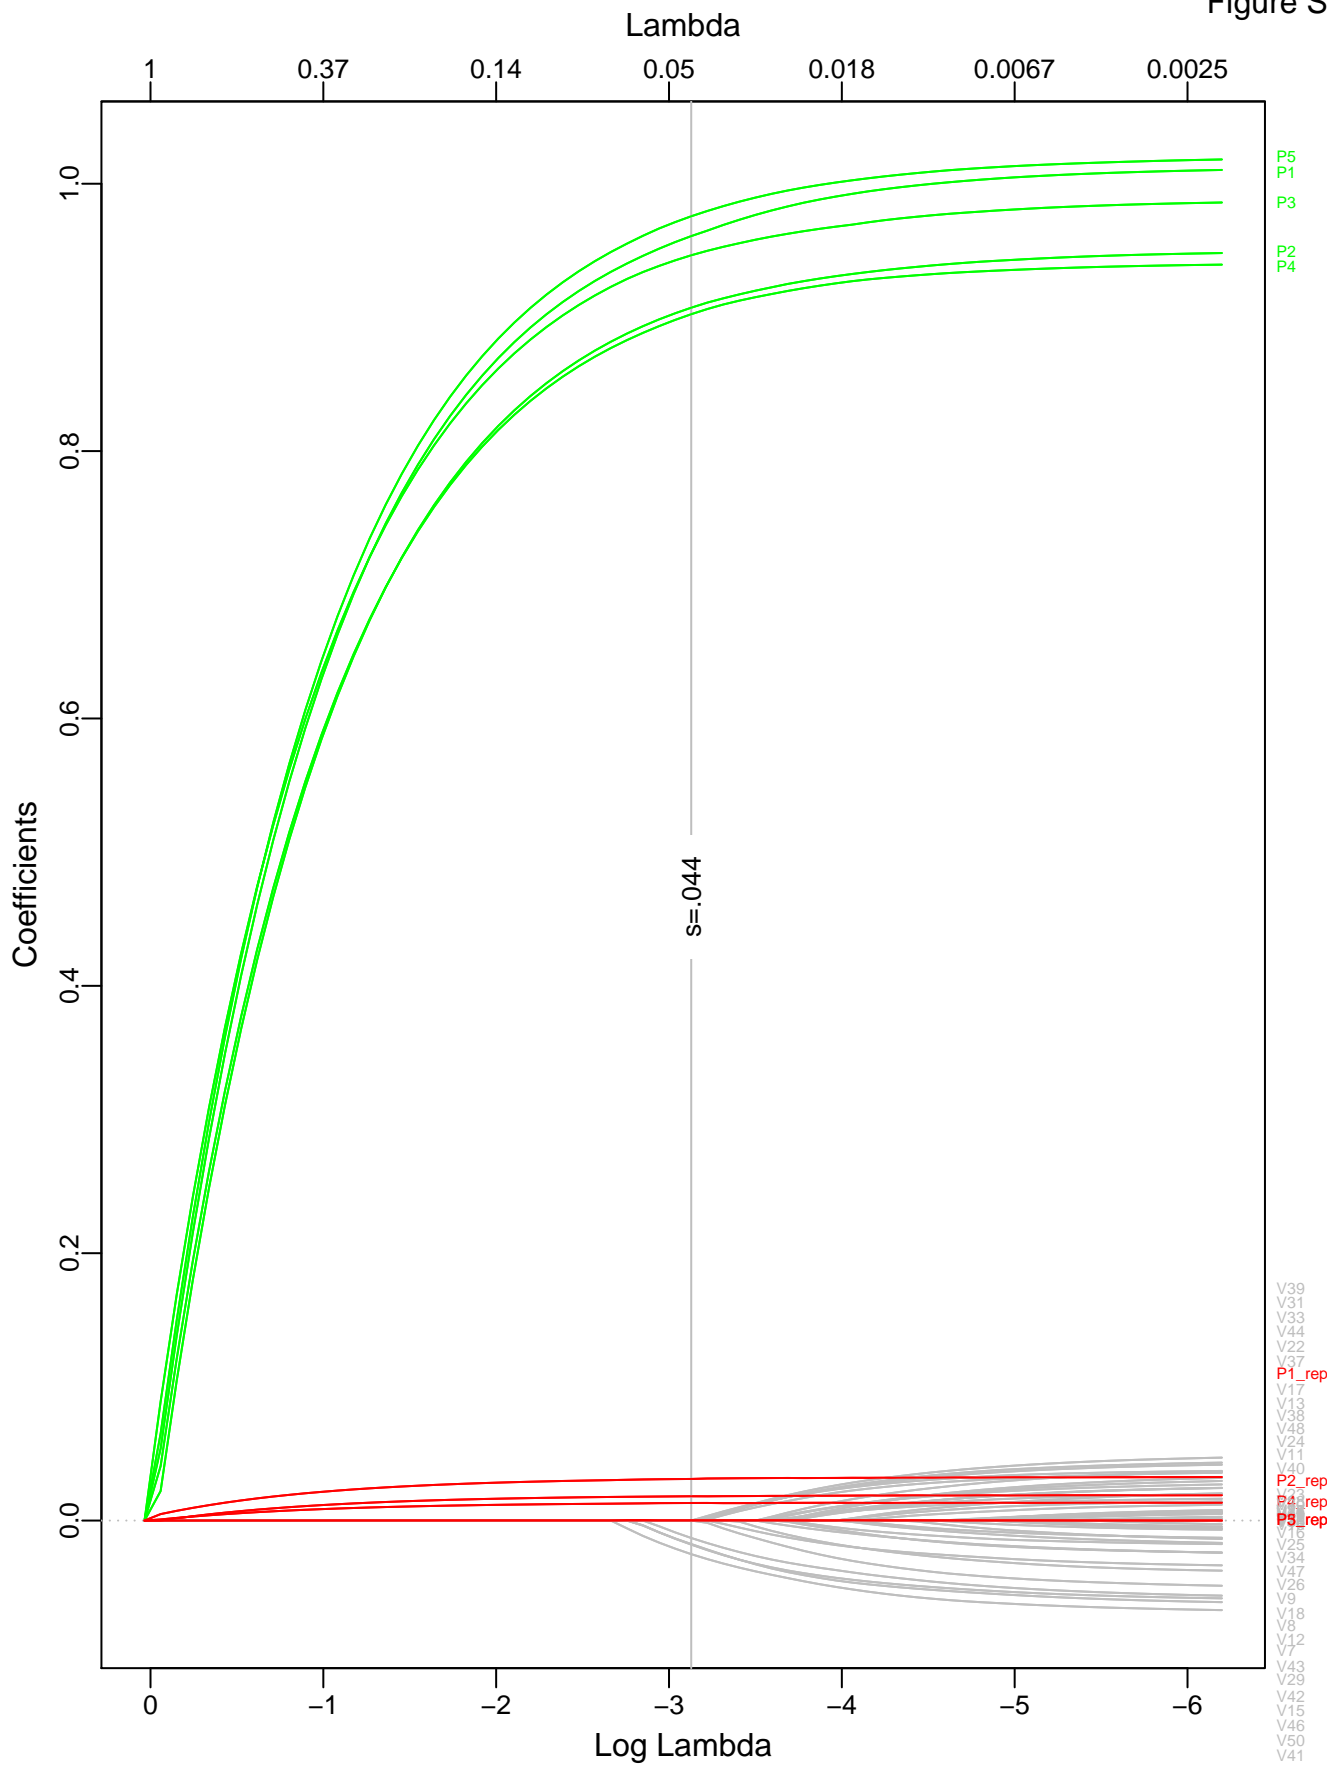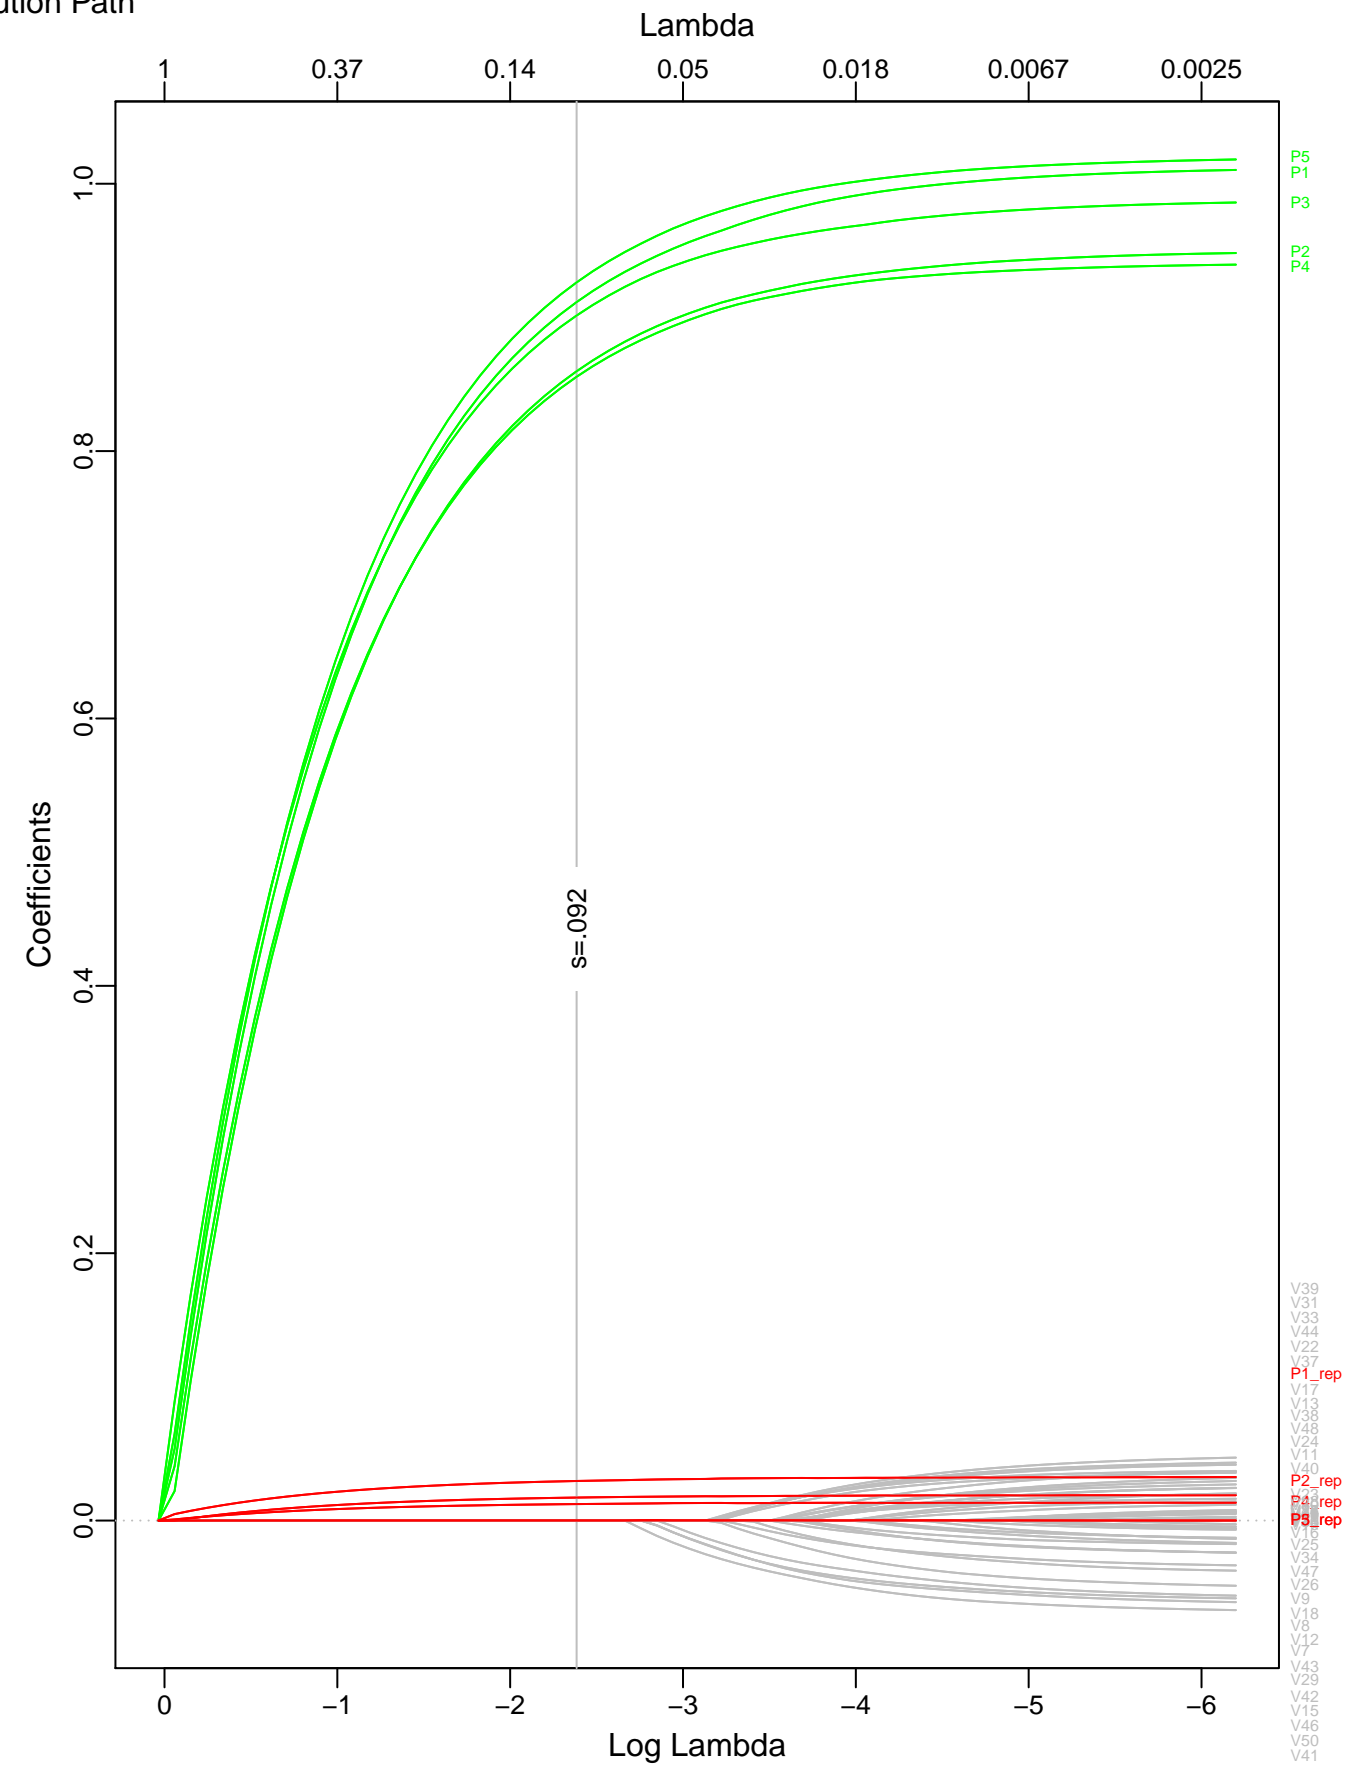

## Lasso simulation Rmarkdown

This is to show how penalized regression work when there are duplicated variables.

```
library("glmnet")
```

```
## Loading required package: Matrix
```

```
## Loaded glmnet 3.0-2
```

```
library(plotmo)
```

```
## Loading required package: Formula
```

```
## Loading required package: plotrix
```

```
## Loading required package: TeachingDemos
```

```
set.seed(99999)
```

```
n <- 1000 # Number of observations.
```

```
p <- 50 # Number of variables.
```

```
real_p <- 5 # Number of true predictors.
```

```
# Generate data with strandard normal distribution.
```

```
x <- matrix(rnorm(n*p), nrow=n, ncol=p)
```

```
# Generate outcomes based on true predictors.
```

```
y <- apply(x[,1:real_p], 1, sum) + rnorm(n)
```

```
# Assign variable names.
```

```
colnames(x) <- c(paste("V", seq(1,p), sep=""))
```

```
colnames(x)[1:real_p] <- c(paste("P", seq(1,real_p), sep=""))
```

```
# Duplicate the predictors
```

```
x <- cbind(x, x[,1:real_p])
```

```
colnames(x)[(p+1):(p+real_p)] <- c(paste("P", seq(1,real_p), "_rep", sep=""))
```

```
# Fit Lasso model.
```

```
fit.lasso <- glmnet(x, y, family="gaussian", alpha=1)
```

```
# 10-fold Cross validation for lambda.
```

```
cv.fit.lasso <- cv.glmnet(x, y, alpha=1, family="gaussian")
```

```
# Get ordered list of variables.
```

```
allnames <- names(coef(fit.lasso)[, ncol(coef(fit.lasso))][order(coef(fit.lasso)[, ncol(coef(fit.lasso))], d
```

```
# Remove intercept.
```

```
allnames <- setdiff(allnames, allnames[grep("Intercept", allnames)])
```

```
# Assign colors
```

```
cols <- rep("gray", length(allnames))
```

```
cols[allnames %in% c(paste("P", seq(1,real_p), sep=""))] <- "green"
```

```
cols[allnames %in% c(paste("P", seq(1,real_p), "_rep", sep=""))] <- "red"
```

```

# Plot solution path.
par(mfrow=c(1,2))
plot_glmnet(fit.lasso,label=TRUE,s=cv.fit.lasso$lambda.min,col=cols)

## Warning in TeachingDemos::spread.labs(beta[iname, ncol(beta)], mindiff = 1.2 * :
## Maximum iterations reached

plot_glmnet(fit.lasso,label=TRUE,s=cv.fit.lasso$lambda.1se,col=cols)

## Warning in TeachingDemos::spread.labs(beta[iname, ncol(beta)], mindiff = 1.2 * :
## Maximum iterations reached

```

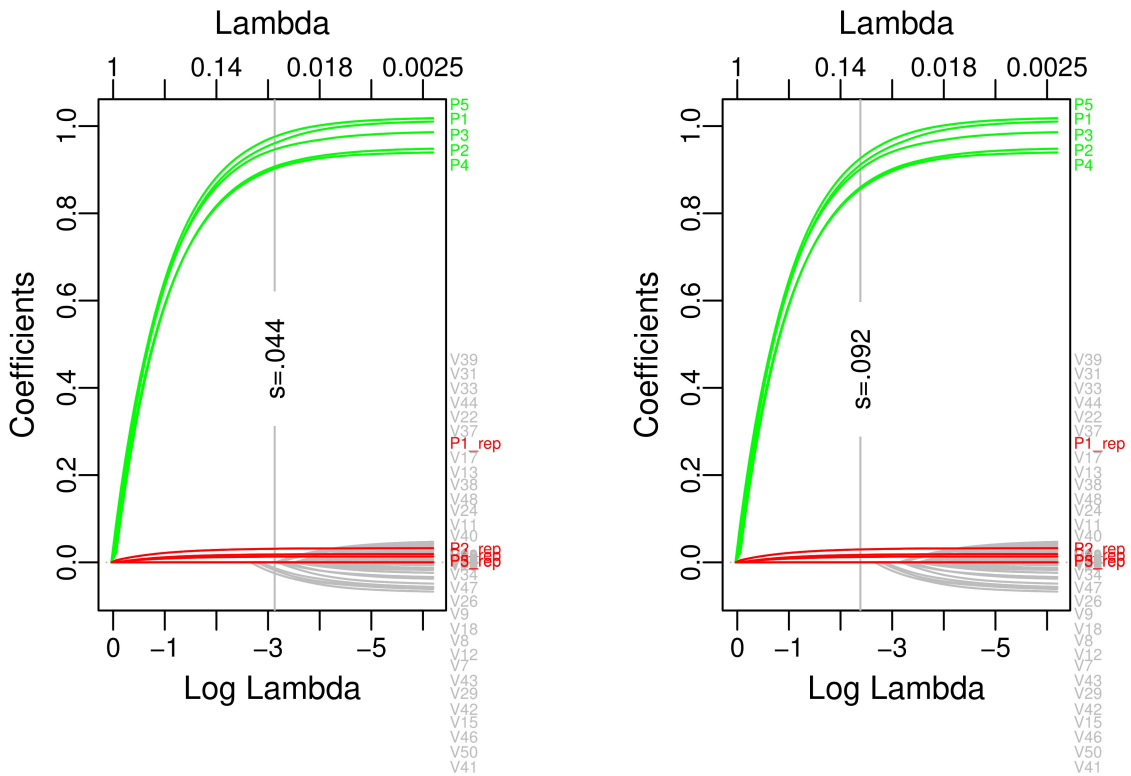

Supplement: MOESM1 [file 12859_2020_3791_MOESM1_ESM.pdf]
